# Supplementary material for: An unusual [4 + 2] fusion strategy to forge meso-N/O-heteroarene-fused (quinoidal) porphyrins with intense near-infrared Q-bands
Source: PubMed Central journal article supplement (PMC6686728; doi:10.1039/c9sc01596e), 2019-06-17

## ***Supporting Information***

### **Unusual [4+2] Fusion Strategy to Forge *meso-N/O*-Heteroarene-Fused (Quinoidal) Porphyrins with Intense Near-Infrared Q-Bands**

*Chengming Li, Lei Zhu, Wenbo Liang, Rongchuan Su, Jiangliang Yin, Yanmei Hu, Yu Lan, Di Wu,\* and Jingsong You\**

<sup>†</sup>Key laboratory of Green Chemistry and Technology of Ministry of Education, College of Chemistry, Sichuan University, 29 Wangjiang Road, Chengdu 610064, P. R. China

<sup>‡</sup>School of Chemistry and Chemical Engineering, and Chongqing Key Laboratory of Theoretical and Computational Chemistry, Chongqing University, Chongqing 400030, P. R. China

E-mail: [jsyou@scu.edu.cn](mailto:jsyou@scu.edu.cn); [wood@scu.edu.cn](mailto:wood@scu.edu.cn)

## Table of contents

|                                                                                                                                                                                     |     |
|-------------------------------------------------------------------------------------------------------------------------------------------------------------------------------------|-----|
| I. General remarks.....                                                                                                                                                             | S3  |
| II. Optimization of the oxidative annulation of O-methyl dioximes of 5,15-dioxoporphyrins <b>Zn1</b> with alkynes.....                                                              | S3  |
| III. General procedure for the synthesis of doubly pyridine-fused <i>anti</i> -quinoidal porphyrins <b>3</b> .....                                                                  | S5  |
| IV. General procedure for the synthesis of pyridinium-fused cations <b>4</b> .....                                                                                                  | S5  |
| V. Optimization of the oxidative annulation of 5,15-dioxoporphyrins <b>Zn2</b> with alkynes.....                                                                                    | S6  |
| VI. General procedure for the preparation of <b>Zn1</b> and <b>Zn2</b> .....                                                                                                        | S7  |
| VII. Preparation and characterization of the doubly pyridine-fused anti-quinoidal porphyrins <b>3</b> and pyridinium-fused porphyrin cations <b>4</b> .....                         | S12 |
| VIII. Preparation and characterization of the doubly pyran-fused porphyrins <b>5</b> and pyrylium-fused porphyrin dimer <b>6</b> .....                                              | S23 |
| IX. HPLC chromatograph for separation of <i>syn</i> - <b>5ah</b> and <i>anti</i> - <b>5ah</b> .....                                                                                 | S30 |
| X. The concentration-dependent <sup>1</sup> H NMR spectra of the mixture of <b>5ah</b> .....                                                                                        | S31 |
| XI. FI-IR spectra of <i>syn</i> - <b>5ah</b> and <i>anti</i> - <b>5ah</b> .....                                                                                                     | S32 |
| XII. DFT calculation detail.....                                                                                                                                                    | S32 |
| XIII. Optical properties of the representative products.....                                                                                                                        | S41 |
| XIV. Cyclic voltammogram measurements.....                                                                                                                                          | S42 |
| XV. Quantification of singlet oxygen generation.....                                                                                                                                | S43 |
| XVI. Single crystal X-ray structures of <b>Zn1a</b> , <b>3aa</b> , <b>4ah</b> , <i>syn</i> - <b>5aa</b> , <i>syn</i> - <b>5af</b> , <i>syn</i> - and <i>anti</i> - <b>5ah</b> ..... | S46 |
| XVII. References.....                                                                                                                                                               | S53 |
| XVIII. Copies of NMR spectra.....                                                                                                                                                   | S55 |

## I. General remarks

NMR spectra were recorded on a Varian Inova 400, or a Bruker AV II-400 spectrometer. The  $^1\text{H}$  NMR (400 MHz) chemical shifts were recorded relative to  $\text{CDCl}_3$ ,  $\text{CD}_2\text{Cl}_2$ , TMS or  $\text{DMSO}-d_6$  as the internal reference ( $\text{CDCl}_3$ :  $\delta_{\text{H}} = 7.26$  ppm;  $\text{CD}_2\text{Cl}_2$ :  $\delta_{\text{H}} = 5.32$  ppm; TMS:  $\delta_{\text{H}} = 0.00$  ppm ;  $\text{DMSO}-d_6$ :  $\delta_{\text{H}} = 2.50$  ppm). The solubility of the product proved too low in common organic solvents to allow the  $^{13}\text{C}$  NMR spectrum to be recorded. High-resolution mass spectra (HRMS) were obtained with a Shimadzu LCMS-IT-TOF (ESI). IR spectra were obtained with NEXUS670FT-IR. X-Ray single-crystal diffraction data were collected on an Oxford Xcalibur E single crystal diffractometer or an Agilent Technologies Gemini plus single crystal diffraction. UV/Vis spectra were measured on a HITACHI U-2910. Fluorescence spectra and absolute quantum yields were collected on a Horiba Jobin Yvon-Edison Fluoromax-4 fluorescence spectrometer with a calibrated integrating sphere system.

Unless otherwise noted, all reagents were obtained from commercial suppliers and used without further purification.  $[\text{Cp}^*\text{RhCl}_2]_2$ <sup>1</sup> and alkynes were prepared according to the literature procedures. The solvents were purified and dried using an Innovative Technology PS-MD-5 Solvent Purification System.  $\text{RhCl}_3 \cdot x\text{H}_2\text{O}$  were purchased from Shanxi Kaida Chemical Engineering (China) CO., Ltd.  $\text{AgSbF}_6$  was purchased from Alfa Aesar.

## II. Optimization of the oxidative annulation of O-methyl dioximes of 5,15-dioxoporphyrins Zn1 with alkynes

A schlenk tube with a magnetic stir bar was charged with metal complex (2.5  $\mu\text{mol}$ , 5.0 mol %),  $\text{AgSbF}_6$  (10  $\mu\text{mol}$ , 20 mol %), oxidant, additive, O-methyl dioxime of 5,15-dioxoporphyrin **Zn1a** (27.8 mg, 0.05 mmol), diphenylacetylene (35.6 mg, 0.2 mmol), and solvent under  $\text{N}_2$  atmosphere. The resulting solution was stirred at room temperature for 10 min and then at the indicated temperature for 24 h. After being cooled down, the reaction mixture was filtered through a Celite pad, and then washed with 30 mL of  $\text{CH}_2\text{Cl}_2$ . The

solvent of the filtrate was removed under reduced pressure. The purification was performed by column chromatography on neutral alumina (petroleum ether/ethyl acetate = 8:1 to 4:1) to provide **3aa** and further by silica gel (petroleum ether/ethyl acetate = 1:1 to 1:3, v/v) to provide **4aa**, respectively.

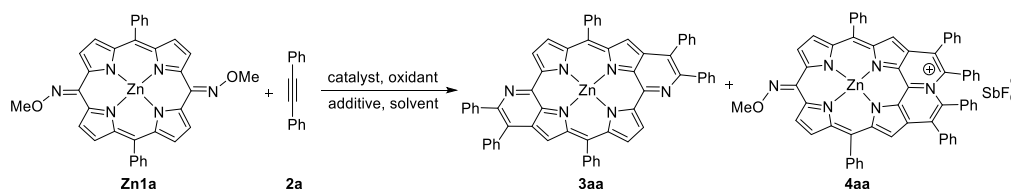

**Table S1.** Optimization for the synthesis of doubly pyridine-fused *anti*-quinoidal porphyrins **3** and pyridinium-fused cations **4**<sup>a</sup>

| Entry                 | Catalyst                                 | Oxidant<br>(equiv)                    | Additive<br>(equiv)            | Solvent (mL)         | Yield of <b>3aa</b><br>(%) <sup>b</sup> | Yield of <b>4aa</b><br>(%) <sup>b</sup> |
|-----------------------|------------------------------------------|---------------------------------------|--------------------------------|----------------------|-----------------------------------------|-----------------------------------------|
| 1                     | [Cp*RhCl <sub>2</sub> ] <sub>2</sub>     | Ag <sub>2</sub> O (2.0)               | -                              | DCE (1.0)            | 28                                      | 12                                      |
| 2 <sup>c</sup>        | [Cp*RhCl <sub>2</sub> ] <sub>2</sub>     | Ag <sub>2</sub> O (2.0)               | -                              | DCE (1.0)            | ND                                      | ND                                      |
| 3                     | [Cp*RhCl <sub>2</sub> ] <sub>2</sub>     | Ag <sub>2</sub> O (2.0)               | NaSbF <sub>6</sub> (2.0)       | DCE (1.0)            | 15                                      | 37                                      |
| 4                     | [Cp*RhCl <sub>2</sub> ] <sub>2</sub>     | Ag <sub>2</sub> O (2.0)               | Zn(OTf) <sub>2</sub> (2.0)     | DCE (1.0)            | 26                                      | trace                                   |
| 5                     | [Cp*RhCl <sub>2</sub> ] <sub>2</sub>     | Ag <sub>2</sub> O (2.0)               | NaSbF <sub>6</sub> (2.0)       | 1,4-dioxane<br>(1.0) | 21                                      | 17                                      |
| 6                     | [Cp*RhCl <sub>2</sub> ] <sub>2</sub>     | Ag <sub>2</sub> O (2.0)               | NaSbF <sub>6</sub> (2.0)       | THF (1.0)            | 35                                      | trace                                   |
| 7                     | [Cp*RhCl <sub>2</sub> ] <sub>2</sub>     | Ag <sub>2</sub> O (2.0)               | NaSbF <sub>6</sub> (2.0)       | toluene (1.0)        | 33                                      | trace                                   |
| 8                     | [Cp*RhCl <sub>2</sub> ] <sub>2</sub>     | Ag <sub>2</sub> O (2.0)               | NaSbF <sub>6</sub> (2.0)       | DMF (1.0)            | 18                                      | trace                                   |
| <b>9</b>              | <b>[Cp*RhCl<sub>2</sub>]<sub>2</sub></b> | <b>Ag<sub>2</sub>O (2.0)</b>          | <b>NaSbF<sub>6</sub> (2.0)</b> | <b>DCE (0.5)</b>     | <b>&lt;10</b>                           | <b>55</b>                               |
| 10                    | [Cp*RhCl <sub>2</sub> ] <sub>2</sub>     | Ag <sub>2</sub> O (3.0)               | NaSbF <sub>6</sub> (2.0)       | DCE (0.5)            | <10                                     | 55                                      |
| 11                    | [Cp*RhCl <sub>2</sub> ] <sub>2</sub>     | Ag <sub>2</sub> O (1.0)               | NaSbF <sub>6</sub> (2.0)       | DCE (0.5)            | <10                                     | 41                                      |
| 12                    | [Cp*RhCl <sub>2</sub> ] <sub>2</sub>     | Ag <sub>2</sub> CO <sub>3</sub> (2.0) | NaSbF <sub>6</sub> (2.0)       | DCE (0.5)            | 13                                      | 45                                      |
| 13                    | [Cp*RhCl <sub>2</sub> ] <sub>2</sub>     | AgOAc (2.0)                           | NaSbF <sub>6</sub> (2.0)       | DCE (0.5)            | 21                                      | trace                                   |
| 14                    | [Cp*IrCl <sub>2</sub> ] <sub>2</sub>     | Ag <sub>2</sub> O (2.0)               | NaSbF <sub>6</sub> (2.0)       | DCE (0.5)            | ND                                      | ND                                      |
| 15                    | [Cp*RhCl <sub>2</sub> ] <sub>2</sub>     | -                                     | -                              | THF (1.0)            | 52                                      | -                                       |
| 16                    | [Cp*RhCl <sub>2</sub> ] <sub>2</sub>     | -                                     | -                              | THF (0.5)            | 52                                      | -                                       |
| <b>17<sup>d</sup></b> | <b>[Cp*RhCl<sub>2</sub>]<sub>2</sub></b> | -                                     | -                              | <b>THF (0.5)</b>     | <b>66</b>                               | -                                       |
| 18 <sup>e</sup>       | [Cp*RhCl <sub>2</sub> ] <sub>2</sub>     | -                                     | -                              | THF (0.5)            | ND                                      | -                                       |

<sup>a</sup>Reaction conditions: **Zn1a** (0.05 mmol), **2a** (0.2 mmol), catalyst (5 mol %), AgSbF<sub>6</sub> (20 mol %), oxidant, additive, and solvent at 120 °C under N<sub>2</sub> for 24 h. <sup>b</sup>Isolated yield. <sup>c</sup>AgSbF<sub>6</sub> was not added. <sup>d</sup>The reaction was carried out at 100 °C. <sup>e</sup>The reaction was carried out at 80 °C.

### III. General procedure for the synthesis of doubly pyridine-fused *anti*-quinoidal porphyrins **3**

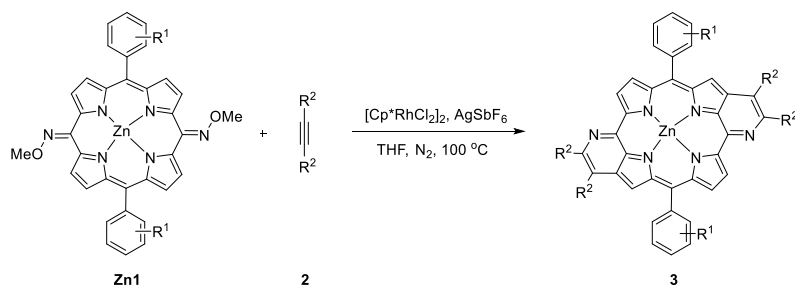

A schlenk tube with a magnetic stir bar was charged with  $[\text{Cp}^*\text{RhCl}_2]_2$  (1.5 mg, 2.5  $\mu\text{mol}$ ),  $\text{AgSbF}_6$  (3.4 mg, 10  $\mu\text{mol}$ ), O-methyl dioximes of 5,15-dioxoporphyrins **Zn1** (0.05 mmol), alkyne (0.2 mmol), and THF (0.5 mL) under  $\text{N}_2$  atmosphere. The resulting solution was stirred at room temperature for 10 min and then at 100 °C for 24 h. After being cooled down, the reaction mixture was filtered through a Celite pad, and then washed with 30 mL of  $\text{CH}_2\text{Cl}_2$ . The solvent of the filtrate was removed under reduced pressure. The purification was performed by column chromatography on neutral alumina to provide the desired product **3**.

### IV. General procedure for the synthesis of pyridinium-fused cations **4**

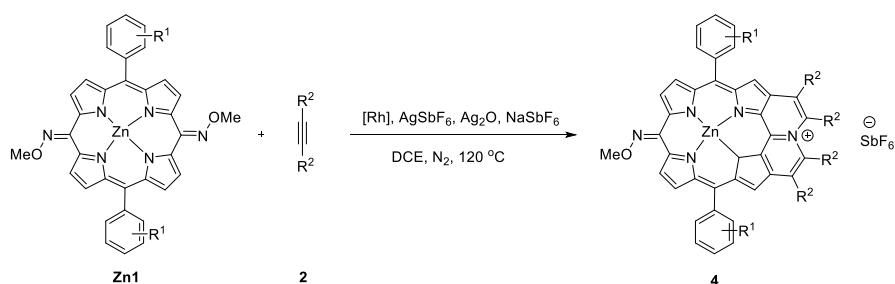

A schlenk tube with a magnetic stir bar was charged with  $[\text{Cp}^*\text{RhCl}_2]_2$  (1.5 mg, 2.5  $\mu\text{mol}$ ),  $\text{AgSbF}_6$  (3.4 mg, 10  $\mu\text{mol}$ ), O-methyl dioximes of 5,15-dioxoporphyrins **Zn1** (0.05 mmol), alkyne (0.2 mmol),  $\text{Ag}_2\text{O}$  (23.2 mg, 0.1 mmol),  $\text{NaSbF}_6$  (25.9 mg, 0.1 mmol), and DCE (0.5 mL) under  $\text{N}_2$  atmosphere. The resulting solution was stirred at room temperature for 10 min and then at 120 °C for 24 h. After being cooled down, the reaction mixture was filtered through a Celite pad, and then washed with 30 mL of  $\text{CH}_2\text{Cl}_2$ . The solvent of the filtrate was removed under reduced pressure. The purification was

performed by column chromatography on silica gel to provide the desired product **4**.

## V. Optimization of the oxidative annulation of 5,15-dioxoporphyrins Zn2 with alkynes

A schlenk tube with a magnetic stir bar was charged with metal complex (2.5  $\mu\text{mol}$ , 5.0 mol %),  $\text{AgSbF}_6$  (10  $\mu\text{mol}$ , 20 mol %), oxidant, additive, 5,15-dioxoporphyrin **Zn2a** (27.8 mg, 0.05 mmol), diphenylacetylene (35.6 mg, 0.2 mmol), and solvent under  $\text{N}_2$  atmosphere. The resulting solution was stirred at room temperature for 10 min and then at the indicated temperature for 24 h. After being cooled down, the reaction mixture was filtered through a Celite pad, and then washed with 30 mL of  $\text{CH}_2\text{Cl}_2$ . The solvent of the filtrate was removed under reduced pressure. The purification was performed by column chromatography on neutral alumina (petroleum ether/ethyl acetate = 10:1 to 5:1, v/v) to provide **5aa** (a mixture of *syn*- and *anti*-isomers).

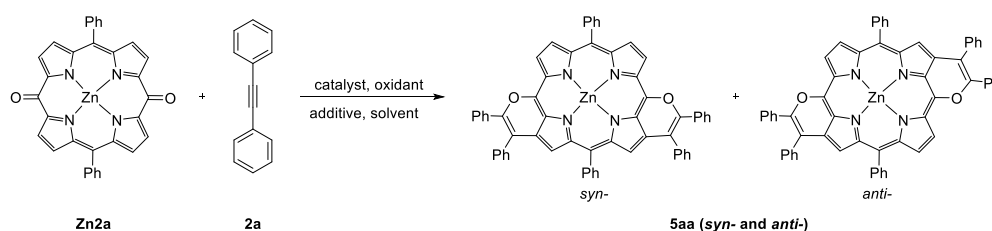

**Table S2.** Optimization for the synthesis of doubly pyran-fused porphyrin<sup>a</sup>

| Entry          | Catalyst                                         | Oxidant<br>(equiv)                            | Additive<br>(equiv)  | Solvent<br>(mL)          | Yield <sup>b</sup><br>(%) |
|----------------|--------------------------------------------------|-----------------------------------------------|----------------------|--------------------------|---------------------------|
| 1              | $[\text{Cp}^*\text{RhCl}_2]_2$                   | $\text{Ag}_2\text{O}$ (2.0)                   | -                    | DCE (1.0)                | 33                        |
| 2 <sup>c</sup> | $[\text{Cp}^*\text{RhCl}_2]_2$                   | $\text{Ag}_2\text{O}$ (2.0)                   | -                    | DCE (1.0)                | ND                        |
| <b>3</b>       | <b><math>[\text{Cp}^*\text{RhCl}_2]_2</math></b> | <b><math>\text{Ag}_2\text{O}</math> (2.0)</b> | -                    | <b>DCE (0.5)</b>         | <b>46</b>                 |
| 4 <sup>d</sup> | $[\text{Cp}^*\text{RhCl}_2]_2$                   | $\text{Ag}_2\text{O}$ (2.0)                   | -                    | DCE (0.5)                | 35                        |
| 5              | $[\text{Cp}^*\text{RhCl}_2]_2$                   | $\text{Ag}_2\text{O}$ (2.0)                   | -                    | DMF (0.5)                | trace                     |
| <b>6</b>       | <b><math>[\text{Cp}^*\text{RhCl}_2]_2</math></b> | <b><math>\text{Ag}_2\text{O}</math> (2.0)</b> | -                    | <b>1,4-dioxane (0.5)</b> | <b>60</b>                 |
| 7              | $[\text{Cp}^*\text{RhCl}_2]_2$                   | $\text{Ag}_2\text{O}$ (2.0)                   | -                    | THF (0.5)                | < 10                      |
| 8              | $[\text{Cp}^*\text{RhCl}_2]_2$                   | $\text{Ag}_2\text{O}$ (2.0)                   | -                    | toluene (0.5)            | 22                        |
| 9              | $[\text{Cp}^*\text{RhCl}_2]_2$                   | $\text{AgOAc}$ (2.0)                          | -                    | DCE (0.5)                | trace                     |
| 10             | $[\text{Cp}^*\text{RhCl}_2]_2$                   | $\text{AgNO}_3$ (2.0)                         | -                    | DCE (0.5)                | ND                        |
| 11             | $[\text{Cp}^*\text{RhCl}_2]_2$                   | $\text{Ag}_2\text{CO}_3$ (2.0)                | -                    | DCE (0.5)                | 42                        |
| 12             | $[\text{Cp}^*\text{RhCl}_2]_2$                   | $\text{Ag}_2\text{O}$ (2.0)                   | PivOH (2.0)          | DCE (0.5)                | <10                       |
| 13             | $[\text{Cp}^*\text{RhCl}_2]_2$                   | $\text{Ag}_2\text{O}$ (2.0)                   | $\text{NaOAc}$ (2.0) | DCE (0.5)                | 28                        |

|    |                                      |                         |                          |           |    |
|----|--------------------------------------|-------------------------|--------------------------|-----------|----|
| 14 | [Cp*RhCl <sub>2</sub> ] <sub>2</sub> | Ag <sub>2</sub> O (2.0) | NaSbF <sub>6</sub> (2.0) | DCE (0.5) | 18 |
| 15 | [Cp*RhCl <sub>2</sub> ] <sub>2</sub> | Ag <sub>2</sub> O (3.0) | -                        | DCE (0.5) | 46 |
| 16 | [Cp*IrCl <sub>2</sub> ] <sub>2</sub> | Ag <sub>2</sub> O (2.0) | -                        | DCE (0.5) | ND |

<sup>a</sup>Reaction conditions: **Zn2a** (0.05 mmol), **2a** (0.2 mmol), [Cp\*RhCl<sub>2</sub>]<sub>2</sub> (5 mol %), AgSbF<sub>6</sub> (20 mol %), oxidant, additive, and solvent at 120 °C under N<sub>2</sub> for 24 h. <sup>b</sup>Isolated yield. <sup>c</sup>AgSbF<sub>6</sub> was not added. <sup>d</sup>The reaction was carried out at 140 °C.

## VI. General procedure for the preparation of Zn1 and Zn2

**H<sub>2</sub>DPP 1**, 5,15-dioxoporphyrin **Zn2a**, **Zn2d**, and 5,15-dioxoporphyrin dimer **Zn2e** were prepared according to the literature procedures.<sup>2-4</sup> 5,15-Diarylporphyrin was prepared according to the literatures.<sup>5</sup> For the preparation of **H<sub>2</sub>DPP 2**, O-methyl dioximes of 5,15-dioxoporphyrins **Zn1** and 5,15-dioxoporphyrin **Zn2**, the following procedure was used.

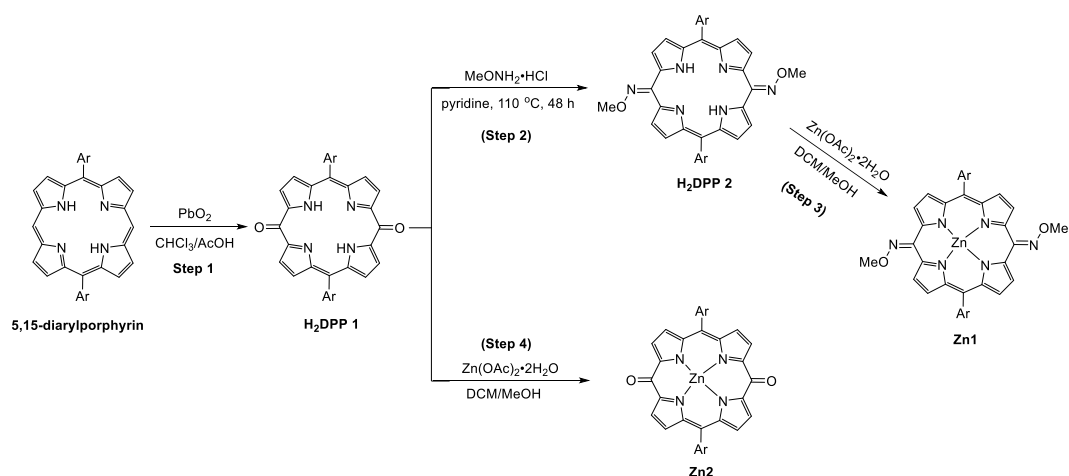

Step 1<sup>2</sup>: 5,15-Diarylporphyrin (0.24 mmol) was dissolved in a mixture of CHCl<sub>3</sub> (14 mL) and AcOH (2.9 mL). A solution of PbO<sub>2</sub> (0.57 g, 2.4 mmol) was added and the reaction mixture was stirred for 5 h open to air, whereafter the mixture was slowly poured into a saturated aqueous sodium bicarbonate solution (45 mL) to quench the AcOH. The aqueous layer was extracted twice with CH<sub>2</sub>Cl<sub>2</sub> (2 × 40 mL), and the two organic fractions were also passed through the Celite. The combined organic filtrates were evaporated and the residue was purified by column chromatography on silica gel to afford the desired product **H<sub>2</sub>DPP 1** as a black solid.

Step 2<sup>6</sup>: A suspension of **H<sub>2</sub>DPP 1** (0.10 mmol) above and MeONH<sub>2</sub>·HCl

(83.5 mg, 1.0 mmol) in pyridine (2.0 mL) was stirred at 110 °C for 48 h. Then pyridine was removed under reduce pressure and CH<sub>2</sub>Cl<sub>2</sub> (30 mL) was added to dilute it. The mixture was washed with water and dried over anhydrous MgSO<sub>4</sub>. The purification was performed by column chromatography on silica gel to provide the desired product **H<sub>2</sub>DPP 2**.

Step 3<sup>5</sup>: A suspension of **H<sub>2</sub>DPP 2** above and Zn(OAc)<sub>2</sub>·2H<sub>2</sub>O (10 equiv) in a mixture of CH<sub>2</sub>Cl<sub>2</sub> (12 mL) and MeOH (6 mL) was stirred at 23 °C for 3 h. The reaction was quenched with water (30 mL), and the mixture was extracted with CH<sub>2</sub>Cl<sub>2</sub> (3 × 30 mL). The combined extracts were washed with water and dried over anhydrous MgSO<sub>4</sub>. The solvent was removed under reduce pressure to give the product O-methyl dioximes of 5,15-dioxoporphyrins **Zn1**. The yield of step 3 was near 100%.

Step 4<sup>5</sup>: A suspension of **H<sub>2</sub>DPP 1** above and Zn(OAc)<sub>2</sub>·2H<sub>2</sub>O (10 equiv) in a mixture of CH<sub>2</sub>Cl<sub>2</sub> (24 mL) and MeOH (12 mL) was stirred at 23 °C for 3 h. The reaction was quenched with water (30 mL), and the mixture was extracted with CH<sub>2</sub>Cl<sub>2</sub> (3 × 30 mL). The combined extracts were washed with water and dried over anhydrous MgSO<sub>4</sub>. The solvent was removed under reduce pressure to give the product 5,15-dioxoporphyrin **Zn2**.

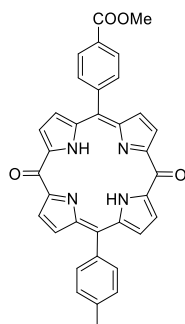

**H<sub>2</sub>DPP 1c**: Following the synthetic procedure step 1. 5-(4-methoxycarbonylphenyl)-15-(4-methylphenyl)porphyrin<sup>7</sup> (128.3 mg, 0.24 mmol) was used. Purification via column chromatography on silica gel (petroleum ether/ CH<sub>2</sub>Cl<sub>2</sub> = 1:1 to 1:3, v/v) afforded **H<sub>2</sub>DPP 1c** as a black solid (80.1 mg, 59% yield). <sup>1</sup>H NMR (CDCl<sub>3</sub>, 400 MHz): δ (ppm) 13.95 (d, *J* = 14.0 Hz, 2H), 8.15 (d, *J* = 8.4 Hz, 2H), 7.52 (d, *J* = 8.4 Hz, 2H), 7.26-7.32 (m, 4H),



7.15 (d,  $J = 4.4$  Hz, 4H), 6.48 (d,  $J = 48.4$  Hz, 4H), 3.99 (s, 3H), 2.46 (s, 3H).

HRMS (ESI<sup>+</sup>): calcd for C<sub>35</sub>H<sub>25</sub>N<sub>4</sub>O<sub>4</sub> [M+H]<sup>+</sup> 565.1870, found 565.1872.

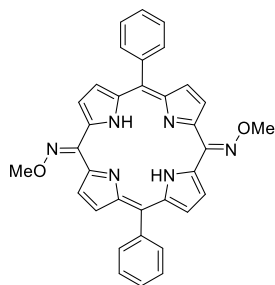

**H<sub>2</sub>DPP 2a**: Following the synthetic procedure step 2. **H<sub>2</sub>DPP 1a** (49.2 mg, 0.10 mmol) was used. Purification via column chromatography on silica gel (petroleum ether/ethyl acetate = 8:1, v/v) afforded **H<sub>2</sub>DPP 2a** as a red solid (50.4 mg, 91% yield). <sup>1</sup>H NMR (CDCl<sub>3</sub>, 400 MHz):  $\delta$  (ppm) 12.41 (s, 2H), 7.42-7.46 (m, 12H), 7.15 (d,  $J = 3.6$  Hz, 2H), 6.77 (d,  $J = 3.6$  Hz, 2H), 6.32 (s, 2H), 4.20 (s, 6H). HRMS (ESI<sup>+</sup>): calcd for C<sub>34</sub>H<sub>27</sub>N<sub>6</sub>O<sub>2</sub> [M+H]<sup>+</sup> 551.2190, found 551.2187.

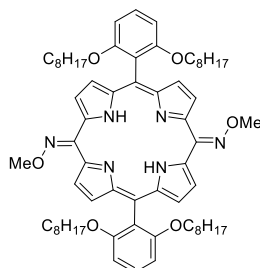

**H<sub>2</sub>DPP 2b**: Following the synthetic procedure step 2. **H<sub>2</sub>DPP 1b** (100.5 mg, 0.10 mmol) was used. Purification via column chromatography on silica gel (petroleum ether/ethyl acetate = 40:1, v/v) afforded **H<sub>2</sub>DPP 2b** as a red solid (82.9 mg, 78% yield). <sup>1</sup>H NMR (CDCl<sub>3</sub>, 400 MHz):  $\delta$  (ppm) 12.47 (s, 2H), 7.42 (d,  $J = 4.4$  Hz, 2H), 7.33 (t,  $J = 8.4$  Hz, 2H), 7.13 (d,  $J = 4.8$  Hz, 2H), 6.75 (d,  $J = 4.4$  Hz, 2H), 6.62 (d,  $J = 8.4$  Hz, 4H), 6.27-6.29 (m, 2H), 4.16 (s, 6H), 3.86-3.90 (m, 8H), 1.10-1.26 (m, 48H), 0.80 (t,  $J = 7.2$  Hz, 12H). HRMS (ESI<sup>+</sup>): calcd for C<sub>66</sub>H<sub>91</sub>N<sub>6</sub>O<sub>6</sub> [M+H]<sup>+</sup> 1063.6995, found 1063.6990.

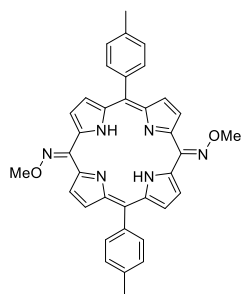

**H<sub>2</sub>DPP 2d**: Following the synthetic procedure step 2. **H<sub>2</sub>DPP 1d** (52.1 mg, 0.10 mmol) was used. Purification via column chromatography on silica gel (petroleum ether/ethyl acetate = 8:1, v/v) afforded **H<sub>2</sub>DPP 2d** as a red solid (50.1 mg, 87% yield). <sup>1</sup>H NMR (CDCl<sub>3</sub>, 400 MHz): δ (ppm) 12.39 (s, 2H), 7.40-7.42 (m, 2H), 7.33-7.35 (m, 4H), 7.24 (s, 2H), 7.13 (d, *J* = 4.4, 2H), 6.81 (d, *J* = 4.8, 2H), 6.35 (m, 2H), 4.20 (s, 6H), 2.46 (s, 6H). HRMS (ESI<sup>+</sup>): calcd for C<sub>36</sub>H<sub>31</sub>N<sub>6</sub>O<sub>2</sub> [M+H]<sup>+</sup> 579.2503, found 579.2505.

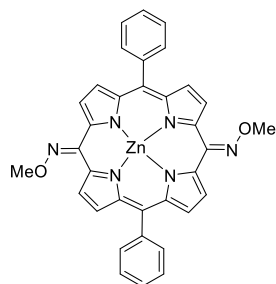

**Zn1a**: Following the synthetic procedure step 3. *O*-methyl dioxime of 5,15-dioxoporphyrin **Zn1a** was prepared as a black solid (55.1 mg, 98%). <sup>1</sup>H NMR (CDCl<sub>3</sub>, 400 MHz): δ (ppm) 7.41-7.48 (m, 10H), 7.31-7.34 (m, 2H), 7.04 (d, *J* = 4.4 Hz, 1H), 6.95 (d, *J* = 4.0 Hz, 1H), 6.68 (t, *J* = 4.0 Hz, 2H), 6.62 (d, *J* = 4.0 Hz, 2H), 4.13 (d, *J* = 6.8 Hz, 6H). HRMS (ESI<sup>+</sup>): calcd for C<sub>34</sub>H<sub>25</sub>N<sub>6</sub>O<sub>2</sub>Zn [M+H]<sup>+</sup> 613.1325, found 613.1323. Single crystals were grown by slow diffusion of *n*-hexane into a solution of **Zn1a** in dichloromethane.

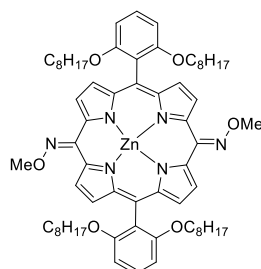

**Zn1b**: Following the synthetic procedure step 3. *O*-methyl dioxime of 5,15-dioxoporphyrin **Zn1b** was prepared as a black solid (85.2 mg, 97%). The

$^1\text{H}$  NMR was not recorded because the exist of isomers. HRMS (ESI<sup>+</sup>): calcd for  $\text{C}_{66}\text{H}_{89}\text{N}_6\text{O}_6\text{Zn}$  [M+H]<sup>+</sup> 1125.6130, found 1125.6124.

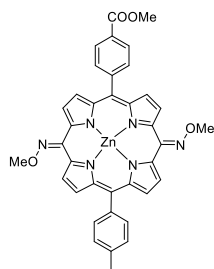

**Zn1c:** Following the synthetic procedure step 2, **H<sub>2</sub>DPP 1c** (56.5 mg, 0.10 mmol) was used. Purification via column chromatography on silica gel (petroleum ether/ethyl acetate = 4:1, v/v) afforded **H<sub>2</sub>DPP 2c** as a red solid (38.1 mg, 61% yield). Then following the procedure step 3, *O*-methyl dioxime of 5,15-dioxoporphyrin **Zn1c** was prepared as a black solid (40.7 mg, 97%).  $^1\text{H}$  NMR (DMSO-*d*<sub>6</sub>, 400 MHz):  $\delta$  (ppm) 8.11 (d, *J* = 8.0 Hz, 2H), 7.53 (d, *J* = 8.0 Hz, 2H), 7.30-7.35 (m, 4H), 7.24 (d, *J* = 8.0 Hz, 2H), 6.94-7.05 (m, 2H), 6.72 (d, *J* = 4.4 Hz, 1H), 6.66 (t, *J* = 8.4 Hz, 1H), 6.60 (t, *J* = 9.6 Hz, 1H), 6.53 (d, *J* = 4.4 Hz, 1H), 4.12-4.14 (m, 6H), 3.98 (s, 3H), 2.46 (s, 3H). HRMS (ESI<sup>+</sup>): calcd for  $\text{C}_{37}\text{H}_{29}\text{N}_6\text{O}_4\text{Zn}$  [M+H]<sup>+</sup> 685.1536, found 685.1529.

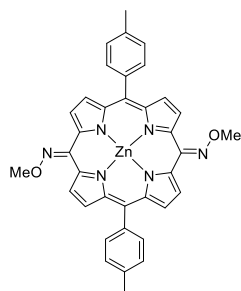

**Zn1d:** Following the synthetic procedure step 3. *O*-methyl dioxime of 5,15-dioxoporphyrin **Zn1d** was prepared as a black solid (85.2 mg, 97%).  $^1\text{H}$  NMR (DMSO-*d*<sub>6</sub>, 400 MHz):  $\delta$  (ppm) 7.26-7.33 (m, 10H), 6.98 (s, 1H), 6.87 (s, 1H), 6.57 (s, 2H), 6.49 (s, 2H), 4.07 (s, 6H), 2.43 (s, 6H). HRMS (ESI<sup>+</sup>): calcd for  $\text{C}_{36}\text{H}_{29}\text{N}_6\text{O}_2\text{Zn}$  [M+H]<sup>+</sup> 641.1638, found 641.1635.

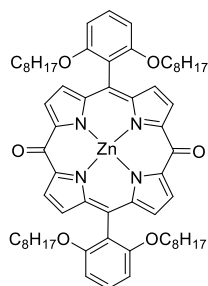

**Zn2b:** Following the synthetic procedure step 1, 5,15-Bis(2,6-diethoxyphenyl)porphyrin (234.1 mg, 0.24 mmol) was used. Purification via column chromatography on silica gel (petroleum ether/ CH<sub>2</sub>Cl<sub>2</sub> = 3:1 to 1:1, v/v) afforded **H<sub>2</sub>DPP 1b** as a brown solid (115.0 mg, 48% yield). Then following the procedure step 4, 5,15-dioxoporphyrin **Zn2b** was prepared as a black solid (119.8 mg, 98%). <sup>1</sup>H NMR (CDCl<sub>3</sub>, 400 MHz): δ (ppm) 7.26-7.30 (m, 2H), 6.87-6.91 (m, 4H), 6.52-6.56 (m, 4H), 6.22-6.28 (m, 4H), 3.85-3.88 (m, 8H), 1.19-1.25 (m, 48H), 0.80-0.84 (t, *J* = 6.6 Hz, 12H). HRMS (ESI<sup>+</sup>): calcd for C<sub>64</sub>H<sub>83</sub>N<sub>4</sub>O<sub>6</sub>Zn [M+H]<sup>+</sup> 1067.5599, found 1067.5602.

## VII. Preparation and characterization of the doubly pyridine-fused *anti*-quinoidal porphyrins **3** and pyridinium-fused porphyrin cations **4**

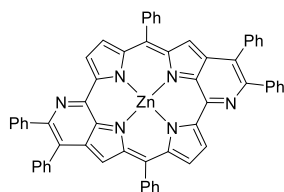

**3aa:** Following the general procedure. *O*-methyl dioxime of 5,15-dioxoporphyrin **Zn1a** (30.7 mg, 0.05 mmol) and diphenylacetylene (35.6 mg, 0.2 mmol) were used. Purification via column chromatography on neutral alumina (petroleum ether/ethyl acetate = 8:1 to 4:1) afforded **3aa** as a dark green solid (30.1 mg, 66% yield). <sup>1</sup>H NMR (DMSO-*d*<sub>6</sub>, 400 MHz): δ (ppm) 7.61 (d, *J* = 4.8 Hz, 2H), 7.51-7.55 (m, 10H), 7.26-7.32 (m, 10H), 7.17-7.20 (m, 10H), 6.78 (d, *J* = 4.8 Hz, 2H), 6.16 (s, 2H). HRMS (ESI<sup>+</sup>): calcd for C<sub>60</sub>H<sub>37</sub>N<sub>6</sub>Zn [M+H]<sup>+</sup> 905.2366; found 905.2360. Single crystals were grown by slow diffusion of *n*-hexane into a solution of **3aa** (in the presence of 1% pyridine) in dichloromethane.

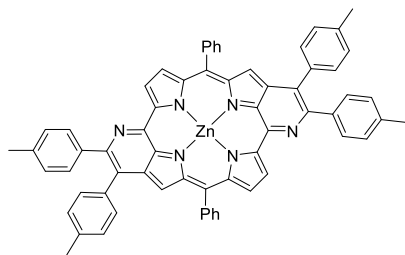

**3ab:** Following the general procedure. *O*-methyl dioxime of 5,15-dioxoporphyrin **Zn1a** (30.7 mg, 0.05 mmol) and 1,2-di-*p*-tolylethyne (41.3 mg, 0.2 mmol) were used. Purification via column chromatography on neutral alumina (petroleum ether/ethyl acetate = 8:1 to 4:1) afforded **3ab** as a dark green solid (24.1 mg, 50% yield). <sup>1</sup>H NMR (DMSO-*d*<sub>6</sub>, 400 MHz):  $\delta$  (ppm) 7.60 (d, *J* = 4.8 Hz, 2H), 7.52-7.55 (m, 10H), 7.20 (d, *J* = 8.0 Hz, 4H), 7.07 (m, 8H), 7.01 (d, *J* = 8.0 Hz, 4H), 6.77 (d, *J* = 4.4 Hz, 2H), 6.16 (s, 2H), 2.26 (d, *J* = 9.6 Hz, 12H). HRMS (ESI<sup>+</sup>): calcd for C<sub>64</sub>H<sub>45</sub>N<sub>6</sub>Zn [M+H]<sup>+</sup> 961.2992; found 961.2991.

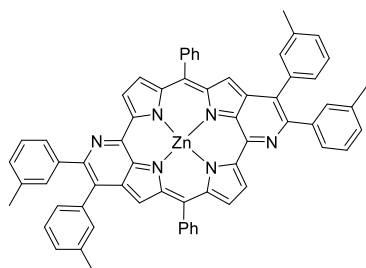

**3ac:** Following the general procedure. *O*-methyl dioxime of 5,15-dioxoporphyrin **Zn1a** (30.7 mg, 0.05 mmol) and 1,2-di-*m*-tolylethyne (41.3 mg, 0.2 mmol) were used. Purification via column chromatography on neutral alumina (petroleum ether/ethyl acetate = 8:1 to 4:1) afforded **3ac** as a dark green solid (25.4 mg, 53% yield). <sup>1</sup>H NMR (DMSO-*d*<sub>6</sub>, 400 MHz):  $\delta$  (ppm) 7.62 (d, *J* = 4.8 Hz, 2H), 7.51-7.55 (m, 10H), 7.14-7.22 (m, 4H), 6.99-7.08 (m, 10H), 6.95 (d, *J* = 7.6 Hz, 2H), 6.80 (d, *J* = 4.8 Hz, 2H), 6.15 (s, 2H), 2.20 (s, 6H), 2.17 (s, 6H). HRMS (ESI<sup>+</sup>): calcd for C<sub>64</sub>H<sub>45</sub>N<sub>6</sub>Zn [M+H]<sup>+</sup> 961.2992; found 961.2991.

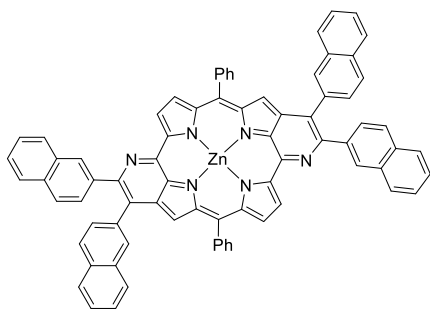

**3ad:** Following the general procedure. *O*-methyl dioxime of 5,15-dioxoporphyrin **Zn1a** (30.7 mg, 0.05 mmol) and 1,2-di(naphthalene-2-yl)ethyne (55.7 mg, 0.2 mmol) were used. Purification via column chromatography on neutral alumina (petroleum ether/ethyl acetate = 8:1 to 4:1) afforded **3ad** as a dark green solid (30.0 mg, 54% yield). <sup>1</sup>H NMR (DMSO-*d*<sub>6</sub>, 400 MHz): δ (ppm) 7.97 (s, 2H), 7.85 (d, *J* = 8.8 Hz, 4H), 7.75-7.78 (m, 6H), 7.69-7.71 (m, 4H), 7.65 (s, 1H), 7.63 (s, 1H), 7.55-7.57 (m, 4H), 7.46-7.51 (m, 10H), 7.38-7.42 (m, 6H), 7.30 (d, *J* = 8.4 Hz, 2H), 6.83 (d, *J* = 4.8 Hz, 2H), 6.25 (s, 2H). HRMS (ESI<sup>+</sup>): calcd for C<sub>76</sub>H<sub>45</sub>N<sub>6</sub>Zn [M+H]<sup>+</sup> 1105.2992; found 1105.2992.

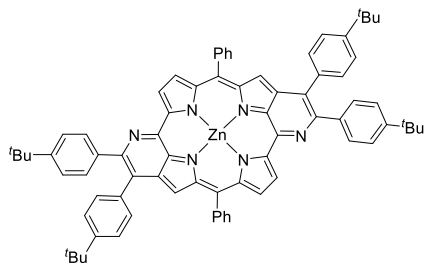

**3ae:** Following the general procedure. *O*-methyl dioxime of 5,15-dioxoporphyrin **Zn1a** (30.7 mg, 0.05 mmol) and 1,2-bis(4-*tert*-butylphenyl)ethyne (58.1 mg, 0.2 mmol) were used. Purification via column chromatography on neutral alumina (petroleum ether/ethyl acetate = 8:1 to 4:1) afforded **3ae** as a dark green solid (33.9 mg, 60% yield). <sup>1</sup>H NMR (CDCl<sub>3</sub>, 400 MHz): δ (ppm) 7.70 (d, *J* = 4.8 Hz, 2H), 7.37-7.47 (m, 10H), 7.24 (d, *J* = 8.4 Hz, 4H), 7.19 (d, *J* = 8.4 Hz, 4H), 7.06-7.13 (m, 8H), 6.74 (d, *J* = 4.4 Hz, 2H), 6.40 (s, 2H), 1.29 (s, 18H), 1.24 (s, 18H). HRMS (ESI<sup>+</sup>): calcd for C<sub>76</sub>H<sub>69</sub>N<sub>6</sub>Zn [M+H]<sup>+</sup> 1129.4870; found 1129.4872.

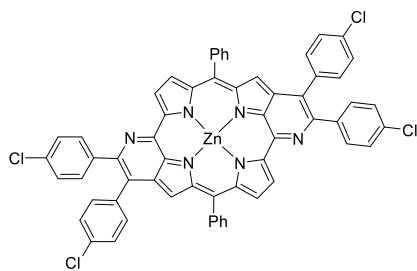

**3af:** Following the general procedure. O-methyl dioxime of 5,15-dioxoporphyrin **Zn1a** (30.7 mg, 0.05 mmol) and 1,2-bis(4-chlorophenyl)ethyne (49.4 mg, 0.2 mmol) were used. Purification via column chromatography on neutral alumina (petroleum ether/ethyl acetate = 8:1 to 4:1) afforded **3af** as a dark green solid (26.5 mg, 51% yield).  $^1\text{H}$  NMR (DMSO- $d_6$ , 400 MHz):  $\delta$  (ppm) 7.65 (d,  $J = 4.8$  Hz, 2H), 7.42-7.46 (m, 10H), 7.27 (d,  $J = 7.2$  Hz, 4H), 7.12-7.21 (m, 16H), 6.78 (d,  $J = 4.8$  Hz, 2H), 6.28 (s, 2H). HRMS (ESI $^+$ ): calcd for  $\text{C}_{60}\text{H}_{33}\text{Cl}_4\text{N}_6\text{Zn}$   $[\text{M}+\text{H}]^+$  1041.0807 ( $^{35}\text{Cl}$ ), 1043.0777 ( $^{37}\text{Cl}$ ); found 1041.0811, 1043.0771.

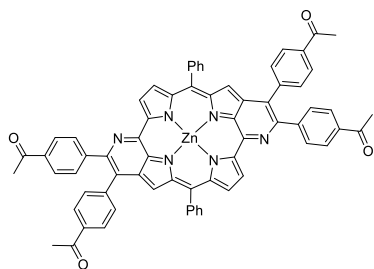

**3ag:** Following the general procedure. **Zn1a** (30.7mg, 0.05mmol) and 1,1'-(4,4'-(ethyne-1,2-diyl)bis(4,1-phenylene))diethanone (52.5 mg, 0.2 mmol) were used. Purification via column chromatography on neutral alumina (petroleum ether/ethyl acetate = 1:1 to 1:3) afforded **3ag** as a dark green solid (33.3 mg, 62% yield). The solubility of the product proved too low in common organic solvents to allow the  $^1\text{H}$  NMR spectrum to be recorded. HRMS (ESI $^+$ ): calcd for  $\text{C}_{68}\text{H}_{45}\text{O}_4\text{N}_6\text{Zn}$   $[\text{M}+\text{H}]^+$  1073.2788; found 1073.2800.

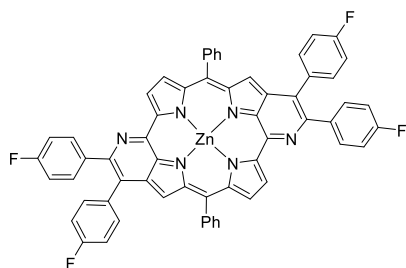

**3ah:** Following the general procedure. *O*-methyl dioxime of 5,15-dioxoporphyrin **Zn1a** (30.7 mg, 0.05 mmol) and 1, 2-bis(4-fluorophenyl)ethyne (42.8 mg, 0.2 mmol) were used. Purification via column chromatography on neutral alumina (petroleum ether/ethyl acetate = 8:1 to 4:1) afforded **3ah** as a dark green solid (19.5 mg, 40% yield). <sup>1</sup>H NMR (DMSO-*d*<sub>6</sub>, 400 MHz): δ (ppm) 7.59 (d, *J* = 4.8 Hz, 2H), 7.51-7.54 (m, 10H), 7.30-7.34 (m, 4H), 7.20-7.23 (m, 4H), 7.12-7.17 (m, 4H), 7.04-7.08 (m, 4H), 6.77 (d, *J* = 4.8 Hz, 2H), 6.13 (s, 2H). HRMS (ESI<sup>+</sup>): calcd for C<sub>60</sub>H<sub>33</sub>F<sub>4</sub>N<sub>6</sub>Zn [M+H]<sup>+</sup> 977.1989; found 977.1993.

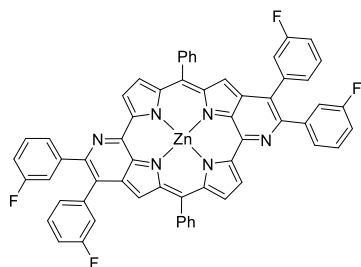

**3ai:** Following the general procedure. *O*-methyl dioxime of 5,15-dioxoporphyrin **Zn1a** (30.7 mg, 0.05 mmol) and 1, 2-bis(3-fluorophenyl)ethyne (42.8 mg, 0.2 mmol) were used. Purification via column chromatography on neutral alumina (petroleum ether/ethyl acetate = 8:1 to 4:1) afforded **3ai** as a dark green solid (26.9 mg, 55% yield). <sup>1</sup>H NMR (DMSO-*d*<sub>6</sub>, 400 MHz): δ (ppm) 7.52-7.60 (m, 12H), 7.32-7.38 (m, 2H), 7.22-7.28 (m, 2H), 7.10-7.16 (m, 6H), 7.01-7.07 (m, 6H), 6.75-6.78 (m, 2H), 6.13 (s, 2H). HRMS (ESI<sup>+</sup>): calcd for C<sub>60</sub>H<sub>33</sub>F<sub>4</sub>N<sub>6</sub>Zn [M+H]<sup>+</sup> 977.1989; found 977.1994.

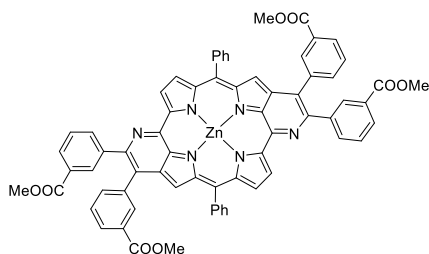

**3aj:** Following the general procedure. *O*-methyl dioxime of 5,15-dioxoporphyrin **Zn1a** (30.7 mg, 0.05 mmol) and 1, 2-bis(3-(methoxycarbonyl)phenyl)ethyne (58.9 mg, 0.2 mmol) were used. Purification via column chromatography on



neutral alumina (petroleum ether/ethyl acetate = 3:1 to 1:1) afforded **3aj** as a dark green solid (29.1 mg, 51% yield).  $^1\text{H}$  NMR (DMSO- $d_6$ , 400 MHz):  $\delta$  (ppm) 7.97 (t,  $J = 3.6$  Hz, 2H), 7.84-7.87 (m, 2H), 7.78-7.80 (m, 4H), 7.60 (d,  $J = 4.4$  Hz, 2H), 7.50-7.54 (m, 12H), 7.43-7.45 (m, 4H), 7.33 (t,  $J = 7.8$  Hz, 2H), 6.81 (d,  $J = 4.8$  Hz, 2H), 6.13 (s, 2H), 3.80 (s, 6H), 3.78 (s, 6H). HRMS (ESI $^+$ ): calcd for  $\text{C}_{68}\text{H}_{45}\text{O}_8\text{N}_6\text{Zn}$   $[\text{M}+\text{H}]^+$  1137.2585; found 1137.2578.

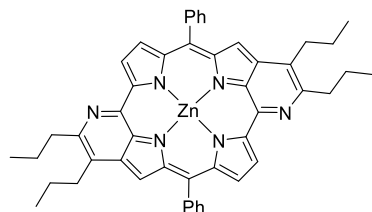

**3ak**: Following the general procedure. O-methyl dioxime of 5,15-dioxoporphyrin **Zn1a** (30.7 mg, 0.05 mmol) and 4-octyne (22.1 mg, 0.2 mmol) were used. Purification via column chromatography on neutral alumina (petroleum ether/ethyl acetate = 8:1 to 4:1) afforded **3ak** as a dark green solid (16.2 mg, 42% yield).  $^1\text{H}$  NMR (DMSO- $d_6$ , 400 MHz):  $\delta$  (ppm) 7.55-7.59 (m, 12H), 6.74 (d,  $J = 4.8$  Hz, 2H), 6.30 (s, 2H), 2.66-2.74 (m, 8H), 1.72-1.77 (m, 4H), 1.50-1.55 (m, 4H), 0.96 (t,  $J = 7.4$  Hz, 6H), 0.87 (t,  $J = 7.4$  Hz, 6H). HRMS (ESI $^+$ ): calcd for  $\text{C}_{48}\text{H}_{45}\text{N}_6\text{Zn}$   $[\text{M}+\text{H}]^+$  769.2992; found 769.2994.

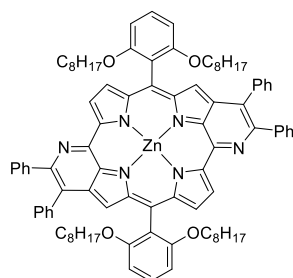

**3ba**: Following the general procedure. O-methyl dioxime of 5,15-dioxoporphyrin **Zn1b** (56.3 mg, 0.05 mmol) and diphenylacetylene (35.6 mg, 0.2 mmol) were used. Purification via column chromatography on neutral alumina (petroleum ether/ethyl acetate = 20:1 to 10:1) afforded **3ba** as a dark green solid (28.3 mg, 40% yield).  $^1\text{H}$  NMR ( $\text{CDCl}_3$ , 400 MHz):  $\delta$  (ppm) 7.70 (d,  $J = 4.8$  Hz, 2H), 7.37-7.39 (m, 4H), 7.30 (t,  $J = 8.2$  Hz, 2H), 7.20-7.22 (m, 10H), 7.16-7.19 (m, 6H), 6.82 (d,  $J = 4.8$  Hz, 2H), 6.61 (d,  $J = 8.4$  Hz, 4H), 6.41 (s,

2H), 3.86-3.96 (m, 8H), 1.25-1.26 (m, 8H), 1.08-1.12 (m, 40H), 0.72 (t,  $J = 6.8$  Hz, 12H). HRMS (ESI<sup>+</sup>): calcd for C<sub>92</sub>H<sub>101</sub>O<sub>4</sub>N<sub>6</sub>Zn [M+H]<sup>+</sup> 1439.6990; found 1439.6998.

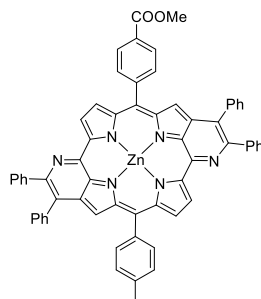

**3ca:** Following the general procedure. O-methyl dioxime of 5,15-dioxoporphyrin **Zn1c** (34.3 mg, 0.05 mmol) and diphenylacetylene (35.6 mg, 0.2 mmol) were used. Purification via column chromatography on neutral alumina (petroleum ether/ethyl acetate = 8:1 to 4:1) afforded **3ca** as a dark green solid (14.7 mg, 30% yield). <sup>1</sup>H NMR (DMSO-*d*<sub>6</sub>, 400 MHz):  $\delta$  (ppm) 8.08 (d,  $J = 8.4$  Hz, 2H), 7.77 (t,  $J = 4.6$  Hz, 2H), 7.54 (t,  $J = 7.4$  Hz, 2H), 7.34-7.38 (m, 6H), 7.17-7.24 (m, 18H), 6.87 (d,  $J = 4.8$  Hz, 1H), 6.73 (d,  $J = 4.8$  Hz, 1H), 6.48 (s, 1H), 6.32 (s, 1H), 3.99 (s, 3H), 2.46 (s, 3H). HRMS (ESI<sup>+</sup>): calcd for C<sub>63</sub>H<sub>41</sub>O<sub>2</sub>N<sub>6</sub>Zn [M+H]<sup>+</sup> 977.2577; found 977.2586.

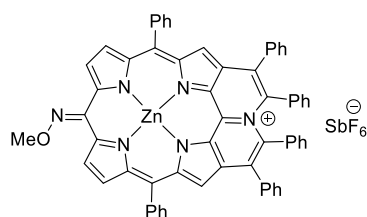

**4aa:** Following the general procedure. O-methyl dioxime of 5,15-dioxoporphyrin **Zn1a** (30.7 mg, 0.05 mmol) and diphenylacetylene (35.6 mg, 0.2 mmol) were used. Purification via column chromatography on silica gel (petroleum ether/ethyl acetate = 1:1 to 1:3) afforded **4aa** as a black solid (32.2 mg, 55% yield). <sup>1</sup>H NMR (DMSO-*d*<sub>6</sub>, 400 MHz):  $\delta$  (ppm) 7.82 (s, 2H), 7.59-7.66 (m, 10H), 7.10-7.18 (m, 8H), 6.99 (s, 4H), 6.86-6.89 (m, 2H), 6.75-6.79 (m, 4H), 6.39-6.48 (m, 6H), 4.45 (s, 3H). HRMS (ESI<sup>+</sup>): calcd for C<sub>61</sub>H<sub>39</sub>ON<sub>6</sub>Zn [M]<sup>+</sup> 935.2471; found 935.2473.

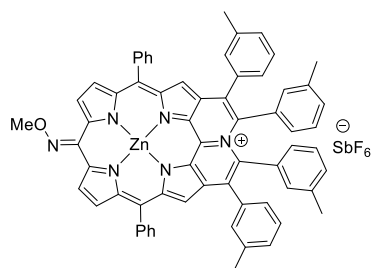

**4ac:** Following the general procedure. O-methyl dioxime of 5,15-dioxoporphyrin **Zn1a** (30.7 mg, 0.05 mmol) and 1,2-di-*m*-tolylethyne (41.3 mg, 0.2 mmol) were used. Purification via column chromatography on silica gel (petroleum ether/ethyl acetate = 1:1 to 1:3) afforded **4ac** as a black solid (24.5 mg, 40% yield).  $^1\text{H}$  NMR (DMSO- $d_6$ , 400 MHz):  $\delta$  (ppm) 7.81 (d,  $J = 4.8$  Hz, 1H), 7.65 (d,  $J = 4.8$  Hz, 1H), 7.58-7.61 (m, 10H), 6.40-7.19 (m, 20H), 4.44 (s, 3H), 1.72-2.19 (m, 12H). HRMS (ESI $^+$ ): calcd for  $\text{C}_{65}\text{H}_{47}\text{ON}_6\text{Zn}$  [M] $^+$  991.3097; found 991.3098.

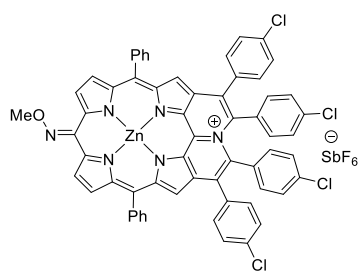

**4af:** Following the general procedure. O-methyl dioxime of 5,15-dioxoporphyrin **Zn1a** (30.7 mg, 0.05 mmol) and 1,2-bis(4-chlorophenyl)ethyne (49.4 mg, 0.2 mmol) were used. Purification via column chromatography on silica gel (petroleum ether/ethyl acetate = 1:1 to 1:3) afforded **4af** as a black solid (32.8 mg, 50% yield).  $^1\text{H}$  NMR (DMSO- $d_6$ , 400 MHz):  $\delta$  (ppm) 7.81 (d,  $J = 4.8$  Hz, 1H), 7.66 (d,  $J = 5.2$  Hz, 1H), 7.58-7.63 (m, 10H), 7.30 (d,  $J = 0.8$  Hz, 2H), 7.28 (d,  $J = 1.2$  Hz, 2H), 7.12 (d,  $J = 4.8$  Hz, 1H), 7.09 (d,  $J = 5.2$  Hz, 1H), 7.03-7.06 (m, 4H), 6.91-6.94 (m, 4H), 6.54-6.59 (t,  $J = 8.4$  Hz, 4H), 6.46 (s, 1H), 6.38 (s, 1H), 4.45 (s, 3H). HRMS (ESI $^+$ ): calcd for  $\text{C}_{61}\text{H}_{35}\text{Cl}_4\text{ON}_6\text{Zn}$  [M] $^+$  1071.0912 ( $^{35}\text{Cl}$ ), 1073.0883 ( $^{37}\text{Cl}$ ); found 1071.0912, 1073.0877.

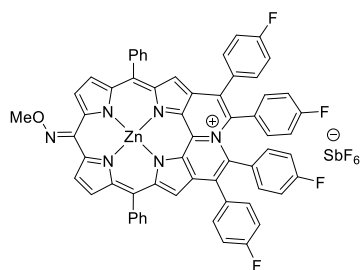

**4ah:** Following the general procedure. *O*-methyl dioxime of 5,15-dioxoporphyrin **Zn1a** (30.7 mg, 0.05 mmol) and 1, 2-bis(4-fluorophenyl)ethyne (42.8 mg, 0.2 mmol) were used. Purification via column chromatography on silica gel (petroleum ether/ethyl acetate = 1:1 to 1:3) afforded **4ah** as a black solid (18.6 mg, 30% yield).  $^1\text{H}$  NMR (DMSO- $d_6$ , 400 MHz):  $\delta$  (ppm) 7.87 (d,  $J = 4.8$  Hz, 1H), 7.70 (d,  $J = 4.8$  Hz, 1H), 7.56-7.64 (m, 10H), 7.16 (d,  $J = 4.8$  Hz, 1H), 7.13 (d,  $J = 4.8$  Hz, 1H), 7.03-7.07 (m, 8H), 6.70-6.75 (m, 4H), 6.55-6.60 (m, 4H), 6.50 (s, 1H), 6.42 (s, 1H), 6.47 (s, 3H). HRMS (ESI $^+$ ): calcd for  $\text{C}_{61}\text{H}_{35}\text{F}_4\text{ON}_6\text{Zn}$  [M] $^+$  1007.2094; found 1007.2099. Single crystals were grown by slow diffusion of *n*-hexane into a solution of **4ah** (in the presence of 1% tetrahydrofuran) in dichloromethane.

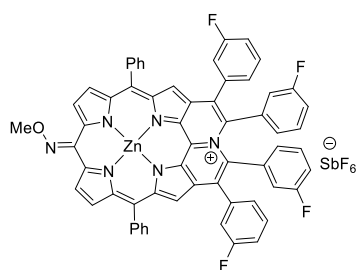

**4ai:** Following the general procedure. *O*-methyl dioxime of 5,15-dioxoporphyrin **Zn1a** (30.7 mg, 0.05 mmol) and 1, 2-bis(4-fluorophenyl)ethyne (42.8 mg, 0.2 mmol) were used. Purification via column chromatography on silica gel (petroleum ether/ethyl acetate = 1:1 to 1:3) afforded **4ai** as a black solid (31.1 mg, 50% yield).  $^1\text{H}$  NMR (DMSO- $d_6$ , 400 MHz):  $\delta$  (ppm) 7.85 (d,  $J = 4.8$  Hz, 1H), 7.69 (d,  $J = 4.8$  Hz, 1H), 7.59-7.64 (m, 10H), 6.66-7.35 (m, 18H), 6.50 (s, 1H), 6.42 (s, 1H), 4.46 (s, 3H). HRMS (ESI $^+$ ): calcd for  $\text{C}_{61}\text{H}_{35}\text{F}_4\text{ON}_6\text{Zn}$  [M] $^+$  1007.2094; found 1007.2088.

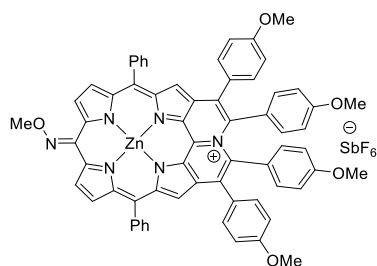

**4aI**: Following the general procedure. *O*-methyl dioxime of 5,15-dioxoporphyrin **Zn1a** (30.7 mg, 0.05 mmol) and 1, 2-bis(4-methoxyphenyl)ethyne (47.7 mg, 0.2 mmol) were used. Purification via column chromatography on silica gel (petroleum ether/ethyl acetate = 1:1 to 1:3) afforded **4aI** as a black solid (39.1 mg, 60% yield).  $^1\text{H}$  NMR (DMSO- $d_6$ , 400 MHz):  $\delta$  (ppm) 7.85 (d,  $J = 4.4$  Hz, 1H), 7.68 (d,  $J = 4.8$  Hz, 1H), 7.57-7.62 (m, 10H), 7.13 (d,  $J = 4.8$  Hz, 1H), 7.10 (d,  $J = 4.4$  Hz, 1H), 6.88-6.91 (m, 4H), 6.76 (d,  $J = 8.0$  Hz, 4H), 6.52 (s, 1H), 6.44 (s, 1H), 6.35-6.41 (m, 8H), 4.45 (s, 3H), 3.67 (s, 6H), 3.61 (d,  $J = 2.8$  Hz, 6H). HRMS (ESI $^+$ ): calcd for  $\text{C}_{65}\text{H}_{47}\text{O}_5\text{N}_6\text{Zn}$  [M] $^+$  1055.2894; found 1055.2899.

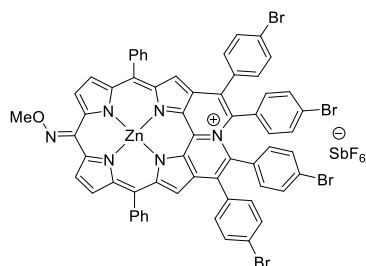

**4aM**: Following the general procedure. *O*-methyl dioxime of 5,15-dioxoporphyrin **Zn1a** (30.7 mg, 0.05 mmol) and 1, 2-bis(4-bromophenyl)ethyne (67.2 mg, 0.2 mmol) were used. Purification via column chromatography on silica gel (petroleum ether/ethyl acetate = 1:1 to 1:3) afforded **4aM** as a black solid (48.4 mg, 65% yield).  $^1\text{H}$  NMR (DMSO- $d_6$ , 400 MHz):  $\delta$  (ppm) 7.82 (d,  $J = 4.8$  Hz, 1H), 7.66 (d,  $J = 4.8$  Hz, 1H), 7.58-7.63 (m, 10H), 7.43 (d,  $J = 7.6$  Hz, 4H), 7.12 (d,  $J = 4.8$  Hz, 1H), 7.10 (d,  $J = 4.4$  Hz, 1H), 7.04-7.07 (m, 4H), 6.97-7.00 (m, 4H), 6.49 (t,  $J = 8.4$  Hz, 4H), 6.46 (s, 1H), 6.38 (s, 1H), 4.45 (s, 3H). HRMS (ESI $^+$ ): calcd for  $\text{C}_{61}\text{H}_{35}\text{Br}_4\text{ON}_6\text{Zn}$  [M] $^+$  1246.8892 ( $^{79}\text{Br}$ ), 1248.8871 ( $^{81}\text{Br}$ ); found 1246.8886, 1248.8863.

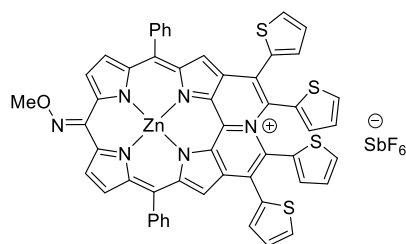

**4an:** Following the general procedure. O-methyl dioxime of 5,15-dioxoporphyrin **Zn1a** (30.7 mg, 0.05 mmol) and 1,2-di(thiophen-2-yl)ethyne (38.1 mg, 0.2 mmol) were used. Purification via column chromatography on silica gel (petroleum ether/ethyl acetate = 1:1 to 1:2) afforded **4an** as a black solid (20.9 mg, 35% yield).  $^1\text{H}$  NMR (DMSO- $d_6$ , 400 MHz):  $\delta$  (ppm) 7.83 (d,  $J = 4.8$  Hz, 1H), 7.68 (d,  $J = 4.8$  Hz, 1H), 7.61-7.64 (m, 10H), 7.54-7.57 (m, 2H), 7.45-7.49 (m, 2H), 7.16 (d,  $J = 4.8$  Hz, 1H), 7.13 (d,  $J = 5.2$  Hz, 1H), 6.99-7.04 (m, 4H), 6.65-6.69 (m, 3H), 6.60 (s, 1H), 6.34-6.37 (m, 2H), 4.46 (s, 3H). HRMS (ESI $^+$ ): calcd for  $\text{C}_{53}\text{H}_{31}\text{S}_4\text{ON}_6\text{Zn}$  [M] $^+$  959.0728; found 959.0729.

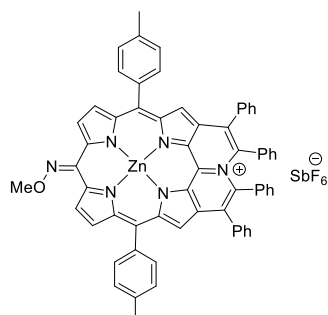

**4da:** Following the general procedure. O-methyl dioxime of 5,15-dioxoporphyrin **Zn1d** (30.7 mg, 0.05 mmol) and diphenylacetylene (35.6 mg, 0.2 mmol) were used. Purification via column chromatography on silica gel (petroleum ether/ethyl acetate = 1:1 to 1:3) afforded **4da** as a black solid (18.0 mg, 30% yield).  $^1\text{H}$  NMR (DMSO- $d_6$ , 400 MHz):  $\delta$  (ppm) 7.81 (d,  $J = 4.8$  Hz, 1H), 7.65 (d,  $J = 5.2$  Hz, 1H), 7.48 (d,  $J = 7.6$  Hz, 4H), 7.38 (d,  $J = 8.0$  Hz, 4H), 7.11-7.19 (m, 10H), 6.97-7.00 (m, 4H), 6.85-6.88 (m, 2H), 6.74-6.79 (m, 4H), 6.52 (s, 1H), 6.43-6.47 (m, 3H), 4.45 (s, 3H), 2.44 (d,  $J = 2.4$  Hz, 6H). HRMS (ESI $^+$ ): calcd for  $\text{C}_{63}\text{H}_{43}\text{ON}_6\text{Zn}$  [M] $^+$  963.2784; found 963.2781.

## VIII. Preparation and characterization of the doubly pyran-fused porphyrins **5** and pyrylium-fused porphyrin dimer **6**

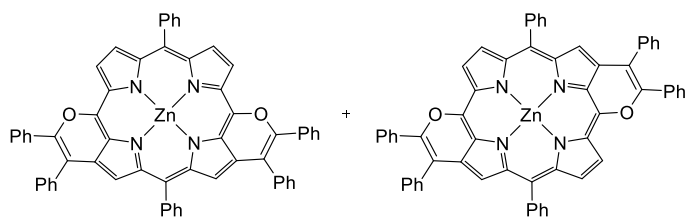

**5aa**: A schlenk tube with a magnetic stir bar was charged with  $[\text{Cp}^*\text{RhCl}_2]_2$  (1.5 mg, 2.5  $\mu\text{mol}$ ),  $\text{AgSbF}_6$  (3.4 mg, 10  $\mu\text{mol}$ ),  $\text{Ag}_2\text{O}$  (23.2 mg, 0.1 mmol), 5,15-dioxoporphyrin **Zn2a** (27.8 mg, 0.05 mmol), diphenylacetylene (35.6 mg, 0.2 mmol), and dioxane (0.5 mL) under  $\text{N}_2$  atmosphere. The resulting solution was stirred at room temperature for 10 min and then at 120  $^\circ\text{C}$  for 24 h. After being cooled down, the reaction mixture was filtered through a Celite pad, and then washed with 30 mL of  $\text{CH}_2\text{Cl}_2$ . The solvent of the filtrate was removed under reduced pressure and the residue was absorbed to small amounts of silica gel. Purification via column chromatography on neutral  $\text{Al}_2\text{O}_3$  (petroleum ether/ethyl acetate = 6:1, v/v) afforded **5aa** as a dark green solid of a mixture of *syn*- and *anti*-configurations in a ratio of ca. 2:1 (27.2 mg, 60% yield). HRMS (ESI<sup>+</sup>): calcd for  $\text{C}_{60}\text{H}_{37}\text{N}_4\text{O}_2\text{Zn}$   $[\text{M}+\text{H}]^+$  909.2202; found 909.2198. Slow diffusion of *n*-hexane into a solution of **5aa** in dichloromethane (in the presence of 1% tetrahydrofuran) gave the single crystals of *syn*-configuration.

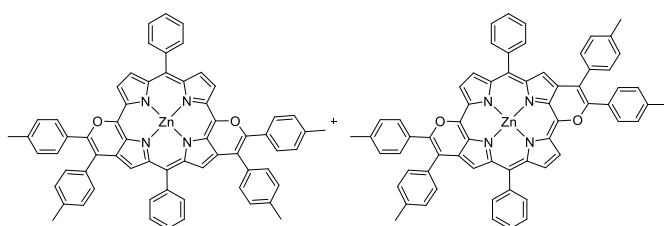

**5ab**: A schlenk tube with a magnetic stir bar was charged with  $[\text{Cp}^*\text{RhCl}_2]_2$  (1.5 mg, 2.5  $\mu\text{mol}$ ),  $\text{AgSbF}_6$  (3.4 mg, 10  $\mu\text{mol}$ ),  $\text{Ag}_2\text{O}$  (23.2 mg, 0.1 mmol), 5,15-dioxoporphyrin **Zn2a** (27.8 mg, 0.05 mmol), 1,2-di-*p*-tolylethyne (41.3 mg, 0.2 mmol), and DCE (0.5 mL) under  $\text{N}_2$  atmosphere. The resulting solution was stirred at room temperature for 10 min and then at 120  $^\circ\text{C}$  for 24 h. After being

cooled down, the reaction mixture was filtered through a Celite pad, and then washed with 30 mL of CH<sub>2</sub>Cl<sub>2</sub>. The solvent of the filtrate was removed under reduced pressure and the residue was absorbed to small amounts of silica gel. Purification via column chromatography on neutral Al<sub>2</sub>O<sub>3</sub> (petroleum ether/ethyl acetate = 6:1, v/v) afforded **5ab** as a dark green solid of a mixture of *syn*- and *anti*-configurations in a ratio of 3.8:1 (21.7 mg, 45% yield). HRMS (ESI<sup>+</sup>): calcd for C<sub>64</sub>H<sub>45</sub>N<sub>4</sub>O<sub>2</sub>Zn [M+H]<sup>+</sup> 965.2828; found 965.2831.

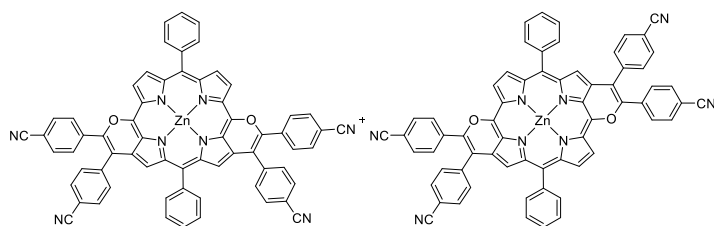

**5ao**: A schlenk tube with a magnetic stir bar was charged with [Cp\**RhCl*<sub>2</sub>]<sub>2</sub> (1.5 mg, 2.5 μmol), AgSbF<sub>6</sub> (3.4 mg, 10 μmol), Ag<sub>2</sub>O (23.2 mg, 0.1 mmol), 5,15-dioxoporphyrin **Zn2a** (27.8 mg, 0.05 mmol), 4,4'-(Ethyne-1,2-diyl)dibenzonitrile (45.7 mg, 0.2 mmol), and DCE (0.5 mL) under N<sub>2</sub> atmosphere. The resulting solution was stirred at room temperature for 10 min and then at 120 °C for 24 h. After being cooled down, the reaction mixture was filtered through a Celite pad, and then washed with 30 mL of CH<sub>2</sub>Cl<sub>2</sub>. The solvent of the filtrate was removed under reduced pressure and the residue was absorbed to small amounts of silica gel. Purification via column chromatography on neutral Al<sub>2</sub>O<sub>3</sub> (petroleum ether/ethyl acetate = 6:1 to 1:1 v/v) afforded **5ao** as a dark green solid of a mixture of *syn*- and *anti*-configurations in a ratio of 4:1 (29.8 mg, 59% yield). HRMS (ESI<sup>+</sup>): calcd for C<sub>64</sub>H<sub>33</sub>N<sub>8</sub>O<sub>2</sub>Zn [M+H]<sup>+</sup> 1009.2012; found 1009.2021.

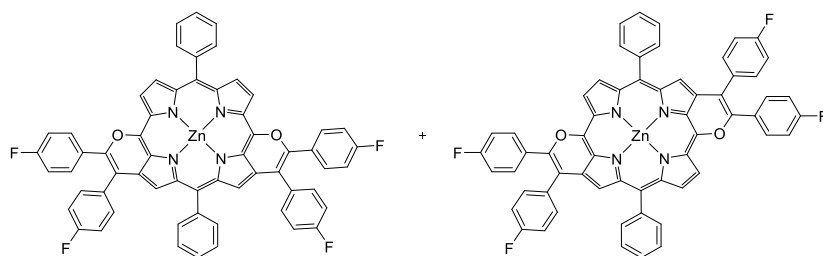

**5ah**: A schlenk tube with a magnetic stir bar was charged with [Cp\**RhCl*<sub>2</sub>]<sub>2</sub> (1.5



mg, 2.5  $\mu\text{mol}$ ),  $\text{AgSbF}_6$  (3.4 mg, 10  $\mu\text{mol}$ ),  $\text{Ag}_2\text{O}$  (23.2 mg, 0.1 mmol), 5,15-dioxoporphyrin **Zn2b** (53.4 mg, 0.05 mmol), 1,2-bis(4-fluorophenyl)ethyne (42.8 mg, 0.2 mmol), and DCE (0.5 mL) under  $\text{N}_2$  atmosphere. The resulting solution was stirred at room temperature for 10 min and then at 120  $^\circ\text{C}$  for 24 h. After being cooled down, the reaction mixture was filtered through a Celite pad, and then washed with 30 mL of  $\text{CH}_2\text{Cl}_2$ . The solvent of the filtrate was removed under reduced pressure and the residue was absorbed to small amounts of silica gel. Purification via column chromatography on neutral  $\text{Al}_2\text{O}_3$  (petroleum ether/ethyl acetate = 4:1, v/v) afforded **5ah** as a dark green solid of a mixture of *syn*- and *anti*-configurations in a ratio of ca. 1:1 (30.1 mg, 58% yield). HRMS ( $\text{ESI}^+$ ): calcd for  $\text{C}_{60}\text{H}_{33}\text{F}_4\text{N}_4\text{O}_2\text{Zn}$   $[\text{M}+\text{H}]^+$  981.1826; found 981.1819.

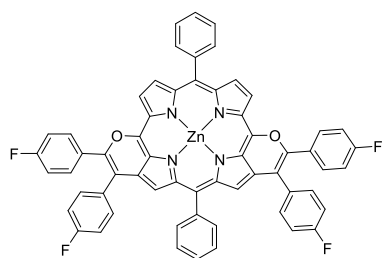

*syn*-**5ah**: HPLC chromatograph was performed with the mixture of **5ah** to afford single *syn* isomer using  $\text{CH}_2\text{Cl}_2$  (0.1% DEA)/*n*-Hexane as eluent.  $^1\text{H}$  NMR ( $\text{CDCl}_3$ , 400 MHz):  $\delta$  (ppm) 9.56 (d,  $J = 4.4$  Hz, 2H), 8.91 (d,  $J = 4.4$  Hz, 2H), 8.38 (s, 2H), 8.25 (d,  $J = 7.2$  Hz, 2H), 8.15 (d,  $J = 6.8$  Hz, 2H), 7.87-7.91 (m, 4H), 7.80 (d,  $J = 6.4$  Hz, 2H), 7.70-7.76 (m, 6H), 7.18-7.24 (m, 10H). HRMS ( $\text{ESI}^+$ ): calcd for  $\text{C}_{60}\text{H}_{33}\text{F}_4\text{N}_4\text{O}_2\text{Zn}$   $[\text{M}+\text{H}]^+$  981.1826; found 981.1821. Slow diffusion of *n*-hexane into a solution of *syn*-**5ah** in dichloromethane (in the presence of 1% tetrahydrofuran) gave the single crystals for X-ray diffraction analysis.

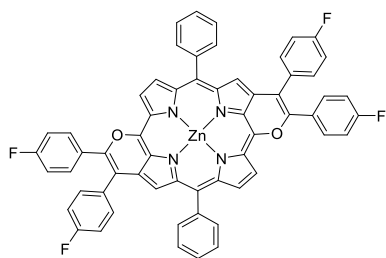

**anti-5ah**: HPLC chromatograph was performed with the mixture of **5ah** to afford single *anti* isomer using CH<sub>2</sub>Cl<sub>2</sub> (0.1% DEA)/*n*-Hexane as eluent. <sup>1</sup>H NMR (CDCl<sub>3</sub>, 400 MHz): δ (ppm) 9.68 (d, *J* = 4.4 Hz, 2H), 8.93 (d, *J* = 4.4 Hz, 2H), 8.53 (s, 2H), 8.22-8.24 (m, 4H), 7.91-7.95 (m, 4H), 7.76-7.81 (m, 10H), 7.19-7.28 (m, 8H). HRMS (ESI<sup>+</sup>): calcd for C<sub>60</sub>H<sub>33</sub>F<sub>4</sub>N<sub>4</sub>O<sub>2</sub>Zn [M+H]<sup>+</sup> 981.1826; found 981.1823. Slow diffusion of *n*-hexane into a solution of *anti-5ah* in dichloromethane (in the presence of 1% tetrahydrofuran) gave the single crystals for X-ray diffraction analysis.

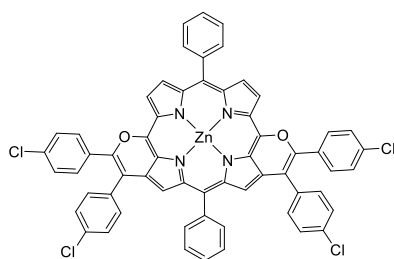

**syn-5af**: A schlenk tube with a magnetic stir bar was charged with [Cp\**Rh*Cl<sub>2</sub>]<sub>2</sub> (1.5 mg, 2.5 μmol), AgSbF<sub>6</sub> (3.4 mg, 10 μmol), Ag<sub>2</sub>O (23.2 mg, 0.1 mmol), 5,15-dioxoporphyrin **Zn2a** (27.8 mg, 0.05 mmol), 1,2-bis(4-chlorophenyl)ethyne (49.4 mg, 0.2 mmol), and DCE (0.5 mL) under N<sub>2</sub> atmosphere. The resulting solution was stirred at room temperature for 10 min and then at 120 °C for 24 h. After being cooled down, the reaction mixture was filtered through a Celite pad, and then washed with 30 mL of CH<sub>2</sub>Cl<sub>2</sub>. The solvent of the filtrate was removed under reduced pressure and the residue was absorbed to small amounts of silica gel. Purification via column chromatography on neutral Al<sub>2</sub>O<sub>3</sub> (petroleum ether/ethyl acetate = 6:1 to 2:1, v/v) afforded crude product of a mixture of *syn*- and *anti*-configurations in a ratio of above 10:1, which was further purified by re-crystallization from

petroleum ether/ ethyl acetate to give pure *syn-5af* (25.1 mg, 48% yield) as a dark green solid.  $^1\text{H NMR}$  ( $\text{CDCl}_3$ , 400 MHz):  $\delta$  (ppm) 9.58 (d,  $J = 4.4$  Hz, 2H), 8.94 (d,  $J = 4.4$  Hz, 2H), 8.41 (s, 2H), 8.27 (d,  $J = 5.2$  Hz, 2H), 8.14 (d,  $J = 6.8$  Hz, 2H), 7.80-7.85 (m, 6H), 7.71-7.74 (m, 6H), 7.48-7.54 (m, 10H). HRMS (ESI $^+$ ): calcd for  $\text{C}_{60}\text{H}_{32}\text{Cl}_4\text{N}_4\text{NaO}_2\text{Zn}$   $[\text{M}+\text{Na}]^+$  1067.0463 ( $^{35}\text{Cl}$ ), 1069.0434 ( $^{37}\text{Cl}$ ); found 1067.0462, 1069.0425. Slow diffusion of *n*-hexane into a solution of *syn-5af* in dichloromethane (in the presence of 1% pyridine) gave the single crystals for X-ray diffraction analysis.

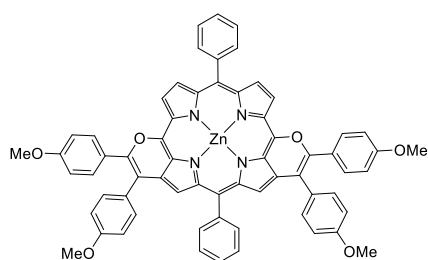

***syn-5al***: A schlenk tube with a magnetic stir bar was charged with  $[\text{Cp}^*\text{RhCl}_2]_2$  (1.5 mg, 2.5  $\mu\text{mol}$ ),  $\text{AgSbF}_6$  (3.4 mg, 10  $\mu\text{mol}$ ),  $\text{Ag}_2\text{O}$  (23.2 mg, 0.1 mmol), 5,15-dioxoporphyrin **Zn2a** (27.8 mg, 0.05 mmol), 1,2-bis(4-methoxyphenyl)ethyne (47.7 mg, 0.2 mmol), and DCE (0.5 mL) under  $\text{N}_2$  atmosphere. The resulting solution was stirred at room temperature for 10 min and then at 120  $^\circ\text{C}$  for 24 h. After being cooled down, the reaction mixture was filtered through a Celite pad, and then washed with 30 mL of  $\text{CH}_2\text{Cl}_2$ . The solvent of the filtrate was removed under reduced pressure and the residue was absorbed to small amounts of silica gel. Purification via column chromatography on neutral  $\text{Al}_2\text{O}_3$  (petroleum ether/ethyl acetate = 1:1 to 1:3, v/v) afforded crude product of a mixture of *syn*- and *anti*-configurations in a ratio of ca. 9:1, which was further purified by re-crystallization from petroleum ether/ $\text{CH}_2\text{Cl}_2$  to give pure *syn-5al* (18.3 mg, 35% yield) as a dark green solid.  $^1\text{H NMR}$  ( $\text{CDCl}_3$ , 400 MHz):  $\delta$  (ppm) 9.58 (d,  $J = 4.0$  Hz, 2H), 8.89 (d,  $J = 4.4$  Hz, 2H), 8.39 (s, 2H), 8.27 (d,  $J = 6.8$  Hz, 2H), 8.16 (d,  $J = 6.4$  Hz, 2H), 7.86 (d,  $J = 8.0$  Hz, 4H), 7.80 (d,  $J = 5.2$  Hz, 4H), 7.70-7.72 (m, 6H), 7.07 (d,  $J = 4.0$  Hz, 4H), 7.01 (d,  $J = 8.8$  Hz, 4H), 3.94 (s, 6H), 3.91 (s, 6H). HRMS

(ESI<sup>+</sup>): calcd for C<sub>64</sub>H<sub>45</sub>N<sub>4</sub>O<sub>6</sub>Zn [M+H]<sup>+</sup> 1029.2625; found 1029.2624.

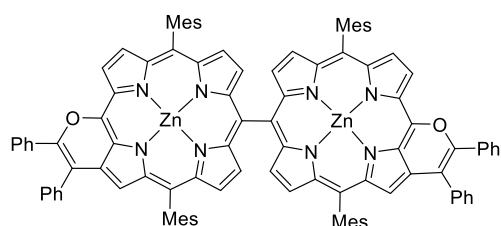

**5ea**: A schlenk tube with a magnetic stir bar was charged with [Cp\*RhCl<sub>2</sub>]<sub>2</sub> (1.5 mg, 2.5 μmol), AgSbF<sub>6</sub> (3.4 mg, 10 μmol), Ag<sub>2</sub>O (23.2 mg, 0.1 mmol), 5,15-dioxoporphyrin dimer **Zn2e** (62.4 mg, 0.05 mmol), diphenylacetylene (35.6 mg, 0.2 mmol), and DCE (0.5 mL) under N<sub>2</sub> atmosphere. The resulting solution was stirred at room temperature for 10 min and then at 120 °C for 24 h. After being cooled down, the reaction mixture was filtered through a Celite pad, and then washed with 30 mL of CH<sub>2</sub>Cl<sub>2</sub>. The solvent of the filtrate was removed under reduced pressure and the residue was absorbed to small amounts of silica gel. Purification via column chromatography on neutral Al<sub>2</sub>O<sub>3</sub> (petroleum ether/ethyl acetate = 6:1, v/v) afforded **5ea** as a dark green solid (40.1 mg, 50% yield). <sup>1</sup>H NMR (CDCl<sub>3</sub>, 400 MHz): δ (ppm) 9.70 (d, *J* = 4.4 Hz, 2H), 8.75 (d, *J* = 4.4 Hz, 2H), 8.39 (s, 2H), 8.38 (d, *J* = 4.4 Hz, 2H), 8.30 (d, *J* = 4.8 Hz, 2H), 8.03 (d, *J* = 4.8 Hz, 2H), 7.99 (d, *J* = 4.8 Hz, 2H), 7.95-7.97 (m, 4H), 7.85-7.87 (m, 4H), 7.48-7.59 (m, 12H), 7.20 (s, 4H), 7.15 (s, 4H), 2.54 (s, 6H), 2.49 (s, 6H), 1.89-1.94 (m, 24H). HRMS (ESI<sup>+</sup>): calcd for C<sub>104</sub>H<sub>78</sub>N<sub>8</sub>O<sub>2</sub>Zn<sub>2</sub> [M]<sup>+</sup> 1598.4831; found 1598.4846.

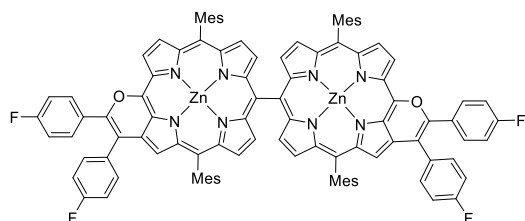

**5eh**: A schlenk tube with a magnetic stir bar was charged with [Cp\*RhCl<sub>2</sub>]<sub>2</sub> (1.5 mg, 2.5 μmol), AgSbF<sub>6</sub> (3.4 mg, 10 μmol), Ag<sub>2</sub>O (23.2 mg, 0.1 mmol), 5,15-dioxoporphyrin dimer **Zn2e** (62.4 mg, 0.05 mmol), diphenylacetylene (42.8 mg, 0.2 mmol), and DCE (0.5 mL) under N<sub>2</sub> atmosphere. The resulting solution was stirred at room temperature for 10 min and then at 120 °C for 24 h.

After being cooled down, the reaction mixture was filtered through a Celite pad, and then washed with 30 mL of CH<sub>2</sub>Cl<sub>2</sub>. The solvent of the filtrate was removed under reduced pressure and the residue was absorbed to small amounts of silica gel. Purification via column chromatography on neutral Al<sub>2</sub>O<sub>3</sub> (petroleum ether/ethyl acetate = 6:1, v/v) afforded **5eh** as a dark green solid (36.8 mg, 44% yield). <sup>1</sup>H NMR (CDCl<sub>3</sub>, 400 MHz): δ (ppm) 9.67 (d, *J* = 4.4 Hz, 2H), 8.76 (d, *J* = 4.4 Hz, 2H), 8.39 (d, *J* = 4.8 Hz, 2H), 8.32 (s, 2H), 8.31 (d, *J* = 4.8 Hz, 2H), 8.03 (d, *J* = 4.8 Hz, 2H), 7.99 (d, *J* = 4.8 Hz, 2H), 7.91-7.95 (m, 4H), 7.79-7.82 (m, 4H), 7.22-7.30 (m, 8H), 7.21 (s, 4H), 7.17 (s, 4H), 2.54 (s, 6H), 2.50 (s, 6H), 1.88-1.93 (m, 24H). HRMS (ESI<sup>+</sup>): calcd for C<sub>104</sub>H<sub>74</sub>F<sub>4</sub>N<sub>8</sub>O<sub>2</sub>Zn<sub>2</sub> [M+H]<sup>+</sup> 1671.4527; found 1671.4532.

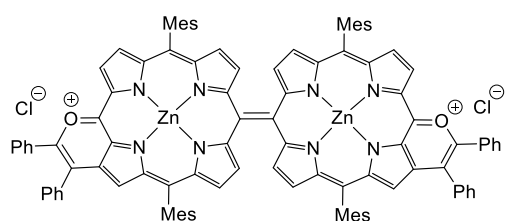

**6**: A flask containing **5ea** (10.0 mg, 6 μmol) was purged with argon, and then charged with dry CH<sub>2</sub>Cl<sub>2</sub> (0.6 mL). A solution of FeCl<sub>3</sub> (9.5 mg, 60 μmol) and DDQ (14 mg, 60 μmol) in MeNO<sub>2</sub> (0.2 mL) was added slowly to the mixture. The mixture was stirred at room temperature for 2 h. The reaction was quenched by addition of saturated aqueous NaHCO<sub>3</sub> solution. The organic phase was separated and washed with brine, and dried over anhydrous Na<sub>2</sub>SO<sub>4</sub>. After removal of the solvent in vacuo, the residue was separated by silica gel chromatography eluting with petroleum ether/ethyl acetate = 1:2 (v/v) to give **6** as a dark solid (4.1 mg, 41% yield). <sup>1</sup>H NMR (CD<sub>2</sub>Cl<sub>2</sub>, 400 MHz): δ (ppm) 7.26-7.31 (m, 16H), 7.19-7.20 (m, 4H), 7.10-7.14 (m, 3H), 7.05-7.07 (m, 2H), 6.91-6.97 (m, 9H), 6.45 (s, 2H), 6.30 (s, 2H), 5.95 (s, 2H), 5.80 (s, 2H), 2.08-2.34 (m, 36H). HRMS (ESI<sup>+</sup>): calcd for C<sub>104</sub>H<sub>78</sub>N<sub>8</sub>O<sub>2</sub>Zn<sub>2</sub> [M]<sup>2+</sup> 799.2410; found 799.2404.

### IX. HPLC chromatograph for separation of *syn*-5ah and *anti*-5ah

Normal phase HPLC was performed firstly using different eluents such as  $\text{CH}_2\text{Cl}_2 / \text{CH}_3\text{OH}$ , ethyl ester/ $\text{CH}_3\text{OH}$  and  $\text{CH}_2\text{Cl}_2/n$ -hexane, and only one peak was observed in all the condition above. When  $\text{CH}_2\text{Cl}_2/n$ -hexane/DEA (60/40/0.1, v: v: v) were chosen as eluent, the mixture of **5ah** showed two peaks with peak area in a ratio of 42.3%:57.7%. The two isomers were further isolated at preparative column by using  $\text{CH}_2\text{Cl}_2$  (0.1% DEA)/ $n$ -hexane as eluent.

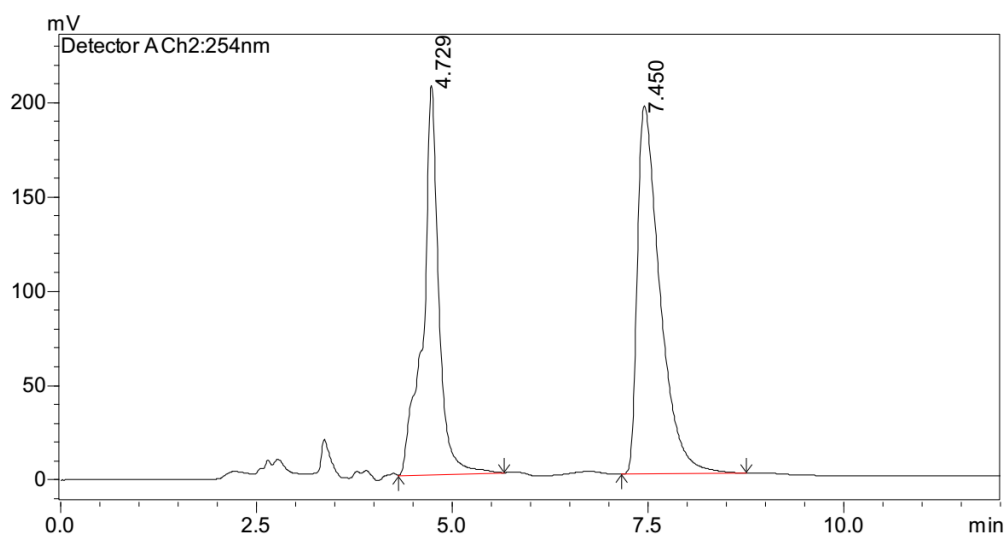

**Figure S1.** HPLC analysis of *syn*- and *anti*-5ah ( $\text{CH}_2\text{Cl}_2$  (0.1% DEA)/ $n$ -hexane gradient).

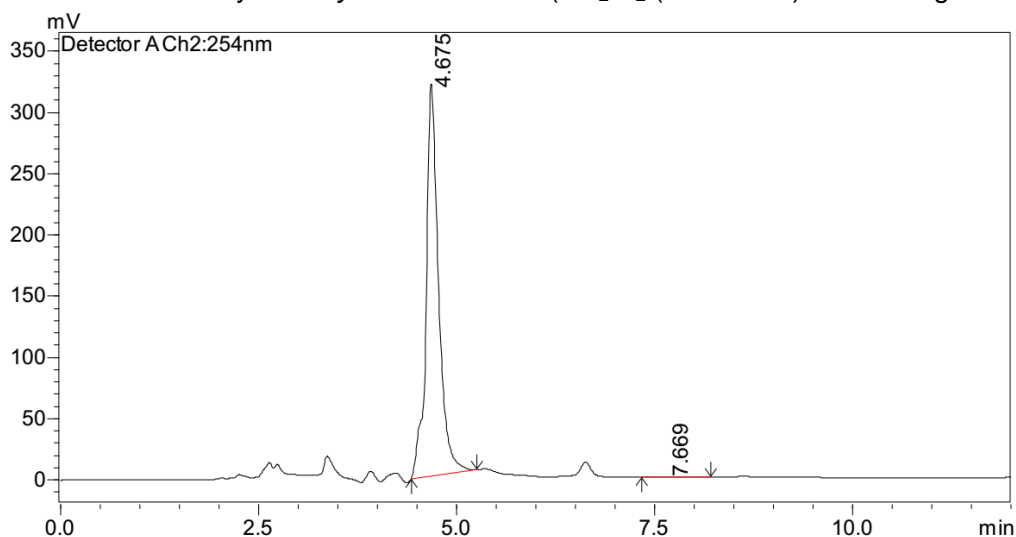

**Figure S2.** HPLC analysis of isolated *syn*-5ah ( $\text{CH}_2\text{Cl}_2$  (0.1% DEA)/ $n$ -hexane gradient).

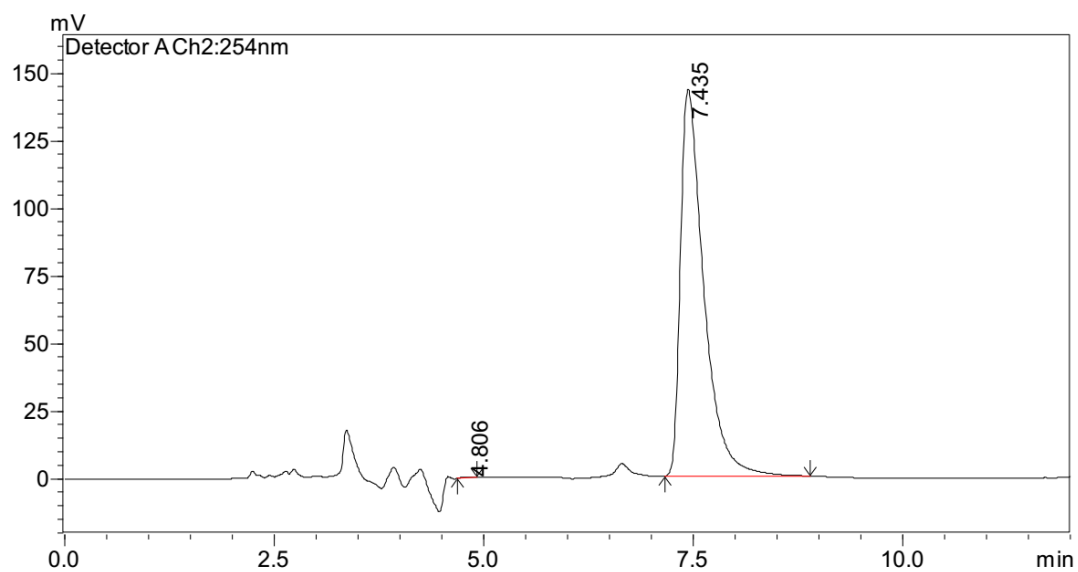

**Figure S3.** HPLC analysis of isolated *anti*-**5ah** ( $\text{CH}_2\text{Cl}_2$  (0.1% DEA)/*n*-hexane gradient).

### X. The concentration-dependent $^1\text{H}$ NMR spectra of the mixture of **5ah**

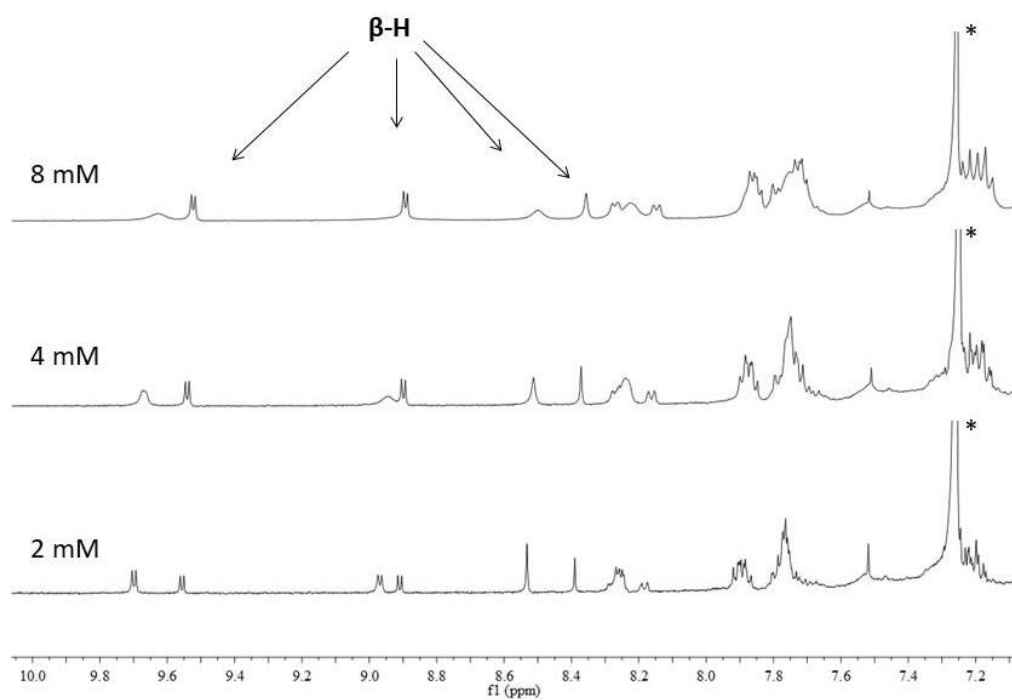

**Figure S4.** The concentration-dependent  $^1\text{H}$  NMR spectra of **5ah** in  $\text{CDCl}_3$  solution. \* represent the peak of  $\text{CDCl}_3$ .

## XI. FI-IR spectra of *syn-5ah* and *anti-5ah*

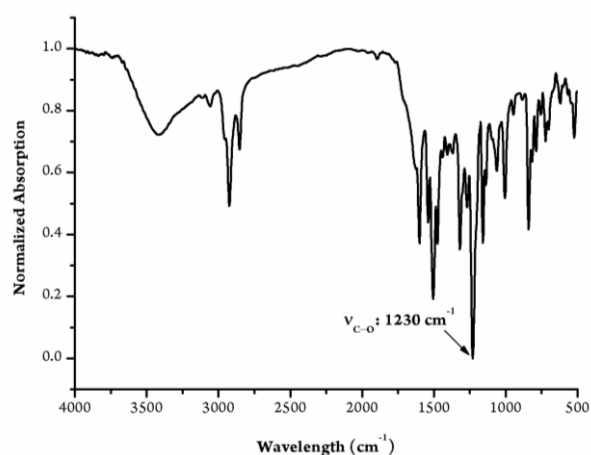

Figure S5. Normalized FI-IR spectrum of *syn-5ah*.

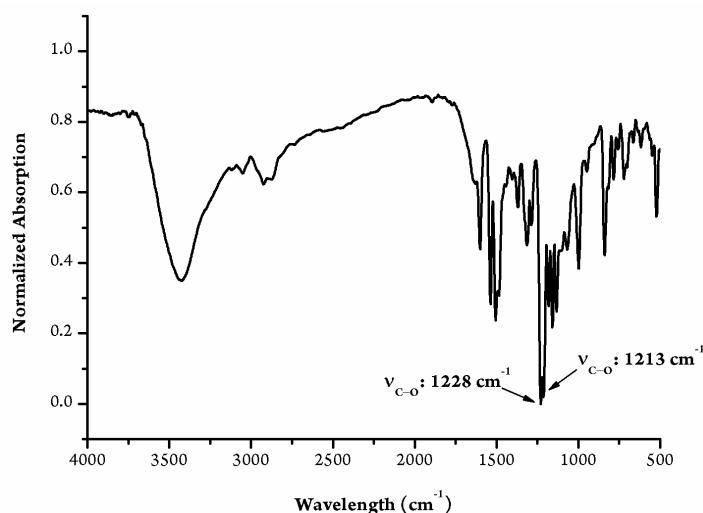

Figure S6. Normalized FI-IR spectrum of *anti-5ah*.

## XII. DFT calculation detail

All the DFT calculations were carried out with the GAUSSIAN 09<sup>8</sup> series of programs. DFT method B3-LYP<sup>9</sup> with a standard 6–31G(d) basis set (lan12dz<sup>10</sup> basis set for Zn atoms) was used for geometry optimizations. Harmonic vibrational frequency calculations were performed for all of the stationary points to confirm them as a local minima. The NICS(1) values and isosurface plots of ACID were carried out using the optimized structures.

### **Geometries for all the optimized compounds:**

|           |            |            |            |   |            |             |             |
|-----------|------------|------------|------------|---|------------|-------------|-------------|
|           |            |            |            | C | 2.33089800 | 1.76741200  | 0.19420500  |
| <b>M3</b> |            |            |            | C | 1.16296700 | 2.59590500  | 0.39246100  |
| C         | 0.45038100 | 0.51658200 | 0.12756400 | N | 0.02691800 | 1.77714900  | 0.34014500  |
| C         | 1.89429500 | 0.48355100 | 0.03456500 | H | 2.50725900 | -0.38899200 | -0.14285300 |



|    |             |             |             |   |             |             |             |
|----|-------------|-------------|-------------|---|-------------|-------------|-------------|
| H  | 3.35238000  | 2.12015100  | 0.16619800  | H | -8.41254200 | -1.85483800 | 2.16449800  |
| C  | -0.43569300 | -0.62896500 | -0.00284300 | H | -9.20504800 | -0.04145700 | -1.66039100 |
| C  | -1.85589400 | -0.54671500 | 0.03747100  | H | -9.92560400 | -1.51314800 | 0.21594400  |
| C  | -2.65712400 | -1.72929500 | -0.14079300 | C | -3.26688400 | 7.98448800  | 1.37576200  |
| C  | -3.99643900 | -1.29901600 | -0.02345100 | C | -1.86377000 | 7.91498300  | 1.29502800  |
| H  | -4.88419100 | -1.90848400 | -0.09712200 | C | -0.97271200 | 9.09193200  | 1.49688100  |
| C  | -5.11095100 | 0.93010500  | 0.37573600  | C | -1.02072000 | 9.84125200  | 2.68510500  |
| C  | -5.10403200 | 2.30842600  | 0.57042800  | C | -0.04076800 | 9.46134500  | 0.51111800  |
| C  | -6.27065900 | 3.13436400  | 0.78646800  | C | -0.16472100 | 10.92648600 | 2.88094700  |
| C  | -4.39057600 | 4.38615100  | 0.84702700  | H | -1.73087600 | 9.56633700  | 3.45981200  |
| H  | -7.29181700 | 2.78116500  | 0.81867200  | C | 0.80928200  | 10.55351800 | 0.70207300  |
| C  | -3.50435600 | 5.53140700  | 0.97955000  | H | 0.00496200  | 8.89604000  | -0.41617100 |
| C  | -2.08601500 | 5.45666000  | 0.88863500  | C | 0.75177400  | 11.28971500 | 1.88907900  |
| C  | -1.28485300 | 6.64187000  | 1.04914100  | H | -0.21536800 | 11.49001600 | 3.80935600  |
| C  | 0.01919200  | 4.81923000  | 0.72583100  | H | 1.51593100  | 10.82858000 | -0.07726900 |
| C  | 1.16929700  | 3.97563400  | 0.57543600  | H | 1.41467800  | 12.13790700 | 2.04024000  |
| N  | -2.64442300 | 0.54190800  | 0.24253400  | C | -4.01177300 | 9.26186400  | 1.59111000  |
| N  | -3.96814700 | 3.12770500  | 0.62004100  | C | -4.96823300 | 9.36039600  | 2.61706500  |
| N  | -1.29761600 | 4.36726200  | 0.68722500  | C | -3.81806700 | 10.37588500 | 0.75584300  |
| C  | -5.83356200 | 4.41710600  | 0.95339600  | C | -5.70152200 | 10.53468200 | 2.80854400  |
| C  | 0.05514200  | 6.20766500  | 0.95573900  | H | -5.12508000 | 8.51341300  | 3.28119500  |
| C  | -3.96095600 | 0.08908400  | 0.20850200  | C | -4.55044800 | 11.54949200 | 0.94440400  |
| H  | -6.44606400 | 5.28833700  | 1.13864500  | H | -3.09269000 | 10.31810600 | -0.05059500 |
| H  | 0.94351400  | 6.81215900  | 1.05959800  | C | -5.49482400 | 11.63540700 | 1.97243500  |
| Zn | -1.97081500 | 2.45376400  | 0.47100000  | H | -6.42977500 | 10.58966600 | 3.61420600  |
| C  | 2.50544500  | 4.65462400  | 0.62530800  | H | -4.38592200 | 12.39708500 | 0.28350100  |
| C  | 3.35015800  | 4.48767400  | 1.73379600  | H | -6.06379800 | 12.55001700 | 2.11910500  |
| C  | 2.93384300  | 5.46823700  | -0.43584200 | C | -2.07627000 | -3.00887600 | -0.34677300 |
| C  | 4.59512900  | 5.12130400  | 1.78165400  | C | -0.67157600 | -3.08593400 | -0.37393200 |
| H  | 3.02334000  | 3.86628300  | 2.56348300  | C | 0.07442400  | -4.35729200 | -0.61948500 |
| C  | 4.18279800  | 6.09300500  | -0.39269900 | C | 1.08364400  | -4.77040900 | 0.26797200  |
| H  | 2.28804400  | 5.60149500  | -1.29979000 | C | -0.16940100 | -5.14319100 | -1.75922500 |
| C  | 5.01620300  | 5.92366000  | 0.71734400  | C | 1.82051600  | -5.93402400 | 0.02985300  |
| H  | 5.23402200  | 4.98714200  | 2.65088700  | H | 1.28045000  | -4.18132500 | 1.16092300  |
| H  | 4.50363700  | 6.71247600  | -1.22649500 | C | 0.56663600  | -6.30484700 | -2.00002200 |
| H  | 5.98557800  | 6.41414200  | 0.75265700  | H | -0.93644600 | -4.83652200 | -2.46455500 |
| C  | -6.44671200 | 0.25017900  | 0.33139400  | C | 1.56411700  | -6.70703400 | -1.10596600 |
| C  | -6.85813700 | -0.58804300 | 1.38022000  | H | 2.59088600  | -6.23748200 | 0.73478900  |
| C  | -7.30803500 | 0.43981600  | -0.76080400 | H | 0.36325000  | -6.89456000 | -2.89061500 |
| C  | -8.10630600 | -1.21460000 | 1.34107100  | H | 2.13591800  | -7.61235600 | -1.29358300 |
| H  | -6.19920800 | -0.74118300 | 2.23072500  | C | -2.96399600 | -4.19784100 | -0.48012400 |
| C  | -8.55269500 | -0.19471200 | -0.80434400 | C | -2.84670700 | -5.29139000 | 0.39535100  |
| H  | -6.99481500 | 1.08076700  | -1.58085400 | C | -3.96106400 | -4.23883600 | -1.47068900 |
| C  | -8.95653200 | -1.02178700 | 0.24777300  | C | -3.69871200 | -6.39154500 | 0.28335400  |

|            |             |             |             |   |              |             |             |
|------------|-------------|-------------|-------------|---|--------------|-------------|-------------|
| H          | -2.08533000 | -5.27445300 | 1.16998400  | C | 2.56612500   | 4.56477700  | 0.49029200  |
| C          | -4.80762600 | -5.34389200 | -1.58979900 | C | 3.44980500   | 4.30796000  | 1.55083100  |
| H          | -4.06071500 | -3.40474900 | -2.16050500 | C | 2.96877600   | 5.44292100  | -0.52958300 |
| C          | -4.68086200 | -6.42427800 | -0.71174000 | C | 4.70713800   | 4.91673900  | 1.59194900  |
| H          | -3.59387100 | -7.22492400 | 0.97371300  | H | 3.14315500   | 3.63782400  | 2.34950900  |
| H          | -5.56563900 | -5.35962200 | -2.36920900 | C | 4.23074000   | 6.04058600  | -0.49460700 |
| H          | -5.34116700 | -7.28319700 | -0.80133000 | H | 2.29389400   | 5.64520300  | -1.35698700 |
| C          | 0.09703400  | -1.91026000 | -0.20271600 | C | 5.10253200   | 5.78185900  | 0.56783500  |
| C          | -4.03526400 | 6.80639000  | 1.22084700  | H | 5.37612400   | 4.71354300  | 2.42426100  |
| H          | 1.17390500  | -2.02211500 | -0.26227300 | H | 4.53213200   | 6.70839700  | -1.29765500 |
| H          | -5.11243800 | 6.92036000  | 1.26888400  | H | 6.08216300   | 6.25178400  | 0.59733500  |
|            |             |             |             | C | -6.51207800  | 0.37872700  | 0.22020900  |
|            |             |             |             | C | -7.22782500  | 0.13702200  | 1.40286600  |
| <b>3aa</b> |             |             |             | C | -7.07923300  | -0.00098500 | -1.00655300 |
| C          | 0.39315100  | 0.49327900  | -0.02610800 | C | -8.48548600  | -0.47140400 | 1.35988500  |
| C          | 1.82993000  | 0.40388300  | -0.15267100 | H | -6.79245600  | 0.41990700  | 2.35771900  |
| C          | 2.31043100  | 1.67095500  | 0.00775900  | C | -8.34036900  | -0.60105500 | -1.04958900 |
| C          | 1.17157100  | 2.54139000  | 0.24306800  | H | -6.53353800  | 0.18492500  | -1.92797600 |
| N          | 0.00743100  | 1.75745900  | 0.20667100  | C | -9.04625500  | -0.83952500 | 0.13365100  |
| H          | 2.37276400  | -0.50857600 | -0.35211300 | H | -9.02545800  | -0.65598200 | 2.28506400  |
| H          | 3.34100700  | 1.99349700  | -0.04320000 | H | -8.77035600  | -0.88126000 | -2.00787100 |
| C          | -0.52760200 | -0.63005500 | -0.14410100 | H | -10.02591100 | -1.30914000 | 0.09995400  |
| C          | -1.93720300 | -0.50465800 | -0.10042200 | C | -3.22083000  | 7.86304900  | 1.38534600  |
| C          | -2.74362800 | -1.68497500 | -0.19632000 | C | -1.80613900  | 7.85024000  | 1.34173000  |
| C          | -4.08138400 | -1.23864800 | -0.06284800 | C | -0.95215000  | 9.03034900  | 1.64671400  |
| H          | -4.97557800 | -1.84372600 | -0.05765100 | C | -1.06504100  | 9.70562000  | 2.87447900  |
| C          | -5.16182000 | 1.03000100  | 0.26599500  | C | 0.01718900   | 9.46867800  | 0.72746000  |
| C          | -5.11594700 | 2.39961000  | 0.48335800  | C | -0.23595400  | 10.78811100 | 3.17216400  |
| C          | -6.26005900 | 3.28163700  | 0.63337500  | H | -1.80587200  | 9.37611900  | 3.59743100  |
| C          | -4.33781100 | 4.44272100  | 0.78449400  | C | 0.84017400   | 10.55885600 | 1.02098200  |
| H          | -7.29498100 | 2.97179800  | 0.58789200  | H | 0.11207700   | 8.96152000  | -0.22936000 |
| C          | -3.41577900 | 5.56027600  | 0.93960000  | C | 0.71777100   | 11.22189100 | 2.24551500  |
| C          | -2.00884900 | 5.44633200  | 0.82622600  | H | -0.33662700  | 11.29480300 | 4.12873400  |
| C          | -1.19858700 | 6.60819700  | 1.04029300  | H | 1.57621300   | 10.88950300 | 0.29214700  |
| C          | 0.07972300  | 4.78418800  | 0.63268000  | H | 1.35951900   | 12.06839700 | 2.47618800  |
| C          | 1.21791500  | 3.91456700  | 0.44690300  | C | -4.02181500  | 9.10361300  | 1.62259300  |
| N          | -2.70847600 | 0.60249100  | 0.06283500  | C | -5.10827700  | 9.06722300  | 2.51313200  |
| N          | -3.94928900 | 3.17468300  | 0.58296400  | C | -3.75778600  | 10.30138500 | 0.93852300  |
| N          | -1.23972600 | 4.35403900  | 0.57429300  | C | -5.89275900  | 10.20099900 | 2.73243900  |
| C          | -5.77957500 | 4.54470200  | 0.82206300  | H | -5.33211000  | 8.13862900  | 3.03012100  |
| C          | 0.14018100  | 6.15988200  | 0.92589100  | C | -4.54847700  | 11.43360100 | 1.14901600  |
| C          | -4.02475000 | 0.15998300  | 0.08579700  | H | -2.93671000  | 10.34728600 | 0.22938500  |
| H          | -6.32626100 | 5.46564600  | 0.96371600  | C | -5.61536100  | 11.39074800 | 2.05116100  |
| H          | 1.03776300  | 6.74539400  | 1.05600800  | H | -6.72329000  | 10.15445800 | 3.43287100  |
| Zn         | -1.97226900 | 2.47301600  | 0.35116400  |   |              |             |             |

|            |             |             |             |    |             |             |             |
|------------|-------------|-------------|-------------|----|-------------|-------------|-------------|
| H          | -4.33159600 | 12.34879900 | 0.60346400  | C  | -4.22208300 | 4.26380800  | 0.60738900  |
| H          | -6.22780300 | 12.27347700 | 2.21760700  | H  | -7.12620300 | 2.79717100  | 0.02196300  |
| C          | -2.13013500 | -2.95167100 | -0.34466600 | C  | -3.34235300 | 5.42026600  | 0.87188200  |
| C          | -0.71682700 | -2.95992400 | -0.42103900 | C  | -1.89707900 | 5.34404000  | 1.13394300  |
| N          | -3.96893900 | 6.75154200  | 1.20681900  | C  | -1.07826900 | 6.37433900  | 1.71382900  |
| N          | 0.02933700  | -1.83828800 | -0.30635600 | C  | 0.16831300  | 4.55659600  | 1.19632600  |
| C          | 0.08428200  | -4.20249300 | -0.64726700 | C  | 1.28693200  | 3.72185800  | 1.04838400  |
| C          | 1.24704100  | -4.42525600 | 0.10993600  | N  | -2.53442400 | 0.44247700  | -0.07019400 |
| C          | -0.25750900 | -5.13739400 | -1.63810100 | N  | -3.81351300 | 2.99589300  | 0.47166100  |
| C          | 2.03173100  | -5.56068300 | -0.09996300 | N  | -1.15182800 | 4.25211700  | 0.84555500  |
| H          | 1.52986000  | -3.69616800 | 0.86357100  | C  | -5.65333600 | 4.36580100  | 0.44673900  |
| C          | 0.53233400  | -6.26868400 | -1.85606600 | C  | 0.19904600  | 5.88208000  | 1.75443100  |
| H          | -1.13924900 | -4.97560200 | -2.25071900 | C  | -3.84065600 | -0.01012300 | -0.15051400 |
| C          | 1.67669500  | -6.48909900 | -1.08411400 | H  | -6.22495000 | 5.27921900  | 0.50285600  |
| H          | 2.92234400  | -5.71923500 | 0.50355900  | H  | 1.07301200  | 6.37738800  | 2.15182900  |
| H          | 0.25383800  | -6.97624700 | -2.63326800 | Zn | -1.85142900 | 2.33915500  | 0.40637400  |
| H          | 2.28850100  | -7.37217100 | -1.25108800 | C  | 2.62703000  | 4.30487300  | 1.34928900  |
| C          | -2.97414900 | -4.17745700 | -0.35297700 | C  | 3.42749100  | 3.76833100  | 2.37386500  |
| C          | -2.77925700 | -5.19544700 | 0.59663400  | C  | 3.11132100  | 5.39851500  | 0.60945200  |
| C          | -4.01667100 | -4.32134300 | -1.28536900 | C  | 4.67568200  | 4.32374900  | 2.66050800  |
| C          | -3.60010900 | -6.32414400 | 0.61105300  | H  | 3.05843300  | 2.93143600  | 2.96021300  |
| H          | -1.98145200 | -5.09701400 | 1.32741500  | C  | 4.36992200  | 5.93728200  | 0.88390900  |
| C          | -4.83177500 | -5.45602600 | -1.27775500 | H  | 2.50768900  | 5.81101400  | -0.19423900 |
| H          | -4.17627200 | -3.54600400 | -2.03044800 | C  | 5.15242200  | 5.40552900  | 1.91318500  |
| C          | -4.62754700 | -6.46127100 | -0.32808100 | H  | 5.27528900  | 3.91168900  | 3.46759600  |
| H          | -3.43553100 | -7.09857200 | 1.35610300  | H  | 4.73752300  | 6.77259500  | 0.29424900  |
| H          | -5.62592500 | -5.55352100 | -2.01401900 | H  | 6.12782000  | 5.83125700  | 2.13190400  |
| H          | -5.26318000 | -7.34304700 | -0.31899900 | C  | -6.32759900 | 0.20791600  | -0.21495800 |
|            |             |             |             | C  | -7.23644500 | 0.15392900  | 0.85536000  |
|            |             |             |             | C  | -6.69515200 | -0.35420100 | -1.44965900 |
|            |             |             |             | C  | -8.48457100 | -0.45259700 | 0.69469600  |
|            |             |             |             | H  | -6.95654500 | 0.57397600  | 1.81776700  |
|            |             |             |             | C  | -7.95024300 | -0.94409300 | -1.61243700 |
|            |             |             |             | H  | -6.00368000 | -0.31040700 | -2.28687300 |
|            |             |             |             | C  | -8.84641000 | -0.99852500 | -0.54011000 |
|            |             |             |             | H  | -9.17290700 | -0.49680200 | 1.53430700  |
|            |             |             |             | H  | -8.22796800 | -1.35991700 | -2.57722400 |
|            |             |             |             | H  | -9.82031400 | -1.46330500 | -0.66657800 |
|            |             |             |             | C  | -1.88218000 | -3.10524300 | -0.38304000 |
|            |             |             |             | C  | -0.49846500 | -3.14377900 | -0.37269500 |
|            |             |             |             | N  | -4.04674800 | 6.52682700  | 0.83264500  |
|            |             |             |             | N  | 0.26009200  | -1.93821600 | -0.47070100 |
|            |             |             |             | C  | 0.23517000  | -4.39451000 | -0.02378600 |
|            |             |             |             | C  | 0.97471000  | -4.42452800 | 1.17190500  |
| <b>4aa</b> |             |             |             |    |             |             |             |
| C          | 0.48262600  | 0.39330600  | 0.05960800  |    |             |             |             |
| C          | 1.89939600  | 0.28258000  | -0.00920700 |    |             |             |             |
| C          | 2.39464100  | 1.54174000  | 0.34925400  |    |             |             |             |
| C          | 1.26183700  | 2.35333700  | 0.62829300  |    |             |             |             |
| N          | 0.09240600  | 1.63670400  | 0.42954800  |    |             |             |             |
| H          | 3.42763100  | 1.85458000  | 0.37595000  |    |             |             |             |
| C          | -0.35056600 | -0.71202500 | -0.21344900 |    |             |             |             |
| C          | -1.75517900 | -0.65886100 | -0.21998600 |    |             |             |             |
| C          | -2.53635900 | -1.83685900 | -0.38787700 |    |             |             |             |
| C          | -3.87296100 | -1.41470200 | -0.33465900 |    |             |             |             |
| H          | -4.75615900 | -2.03310600 | -0.38911100 |    |             |             |             |
| C          | -4.99003500 | 0.85192500  | -0.03952700 |    |             |             |             |
| C          | -4.95988400 | 2.21973200  | 0.21565000  |    |             |             |             |
| C          | -6.10621700 | 3.10115400  | 0.20834600  |    |             |             |             |

|   |             |             |             |               |             |             |             |
|---|-------------|-------------|-------------|---------------|-------------|-------------|-------------|
| C | 0.11716200  | -5.56925500 | -0.77983400 | H             | 3.60174600  | -0.74266900 | -3.04891400 |
| C | 1.58859000  | -5.60362600 | 1.59672200  | C             | 6.65961100  | -0.72272700 | -1.54762800 |
| H | 1.05905300  | -3.52527800 | 1.77784900  | H             | 6.99040000  | -0.85662900 | 0.58195300  |
| C | 0.73582600  | -6.74589600 | -0.35676300 | H             | 6.01022600  | -0.60135200 | -3.60299500 |
| H | -0.44935800 | -5.55890300 | -1.70514800 | H             | 7.71682900  | -0.66582400 | -1.79204100 |
| C | 1.47242600  | -6.76821700 | 0.83150600  | H             | -1.41628800 | 7.33634300  | 2.05895200  |
| H | 2.14975500  | -5.61415800 | 2.52745300  |               |             |             |             |
| H | 0.64146100  | -7.64680900 | -0.95675100 | <b>syn-M4</b> |             |             |             |
| H | 1.94948400  | -7.68732000 | 1.16076200  | C             | 0.45366100  | 0.41667400  | 0.18434700  |
| C | -2.73235400 | -4.33087800 | -0.26910200 | C             | 1.89517500  | 0.38426000  | 0.14545500  |
| C | -2.82474000 | -5.04608200 | 0.93441200  | C             | 2.33344500  | 1.66539300  | 0.34744300  |
| C | -3.50944400 | -4.73696600 | -1.36515000 | C             | 1.16253600  | 2.49392400  | 0.51909600  |
| C | -3.66906500 | -6.15391100 | 1.03464300  | N             | 0.03669800  | 1.70533800  | 0.41107900  |
| H | -2.23212000 | -4.73740100 | 1.79109300  | H             | 2.50912800  | -0.49066000 | -0.02307400 |
| C | -4.34868200 | -5.85024000 | -1.26576700 | H             | 3.35721400  | 2.01223600  | 0.36758600  |
| H | -3.44911200 | -4.18599200 | -2.30093500 | C             | -0.40477700 | -0.69954000 | 0.00721600  |
| C | -4.43031200 | -6.56121800 | -0.06523800 | C             | -1.79843200 | -0.64999900 | 0.01823700  |
| H | -3.73044500 | -6.69976000 | 1.97233200  | C             | -2.61574600 | -1.83509300 | -0.18399800 |
| H | -4.93717100 | -6.15988500 | -2.12542600 | C             | -3.92306300 | -1.41906300 | -0.09884700 |
| H | -5.08337400 | -7.42609200 | 0.01354400  | H             | -4.81207300 | -2.02436300 | -0.19787300 |
| O | -3.36848600 | 7.68054300  | 1.01938700  | C             | -5.04853500 | 0.82788700  | 0.27955800  |
| C | -4.26593700 | 8.80575500  | 0.91598200  | C             | -5.02366900 | 2.22582800  | 0.48902000  |
| H | -5.03688600 | 8.74022500  | 1.68838200  | C             | -6.18649300 | 3.06785200  | 0.66225800  |
| H | -3.63604700 | 9.68241300  | 1.07293400  | C             | -4.28509100 | 4.28615200  | 0.80180800  |
| H | -4.71827200 | 8.82976800  | -0.07903500 | H             | -7.21120500 | 2.72619800  | 0.65822200  |
| C | 2.47330800  | -0.90846700 | -0.55700100 | C             | -3.48407700 | 5.41106500  | 0.99708800  |
| C | 1.64689100  | -1.97883700 | -0.83476800 | C             | -2.06489500 | 5.41376000  | 0.99674400  |
| C | 2.09030100  | -3.09107800 | -1.72427400 | C             | -1.22547700 | 6.56578100  | 1.21805900  |
| C | 3.19218600  | -3.90290200 | -1.41981400 | C             | 0.04089700  | 4.71998900  | 0.87709500  |
| C | 1.44985600  | -3.24920900 | -2.96625400 | C             | 1.17586400  | 3.88903100  | 0.74274600  |
| C | 3.63798000  | -4.85905200 | -2.33272700 | N             | -2.60054000 | 0.44151500  | 0.21259800  |
| H | 3.69429600  | -3.79345300 | -0.46425200 | N             | -3.88511100 | 2.99628000  | 0.58089100  |
| C | 1.89916900  | -4.20363200 | -3.87994100 | N             | -1.27297700 | 4.31037800  | 0.79302000  |
| H | 0.60507800  | -2.61408200 | -3.22310700 | C             | -5.73653500 | 4.35352800  | 0.84674100  |
| C | 2.99470200  | -5.01331700 | -3.56439000 | C             | 0.07329600  | 6.13854200  | 1.14810200  |
| H | 4.48927400  | -5.48524600 | -2.08024000 | C             | -3.90591500 | 0.00598600  | 0.14611100  |
| H | 1.39943000  | -4.30868200 | -4.83936600 | H             | 0.96690800  | 6.73303900  | 1.27756000  |
| H | 3.34645600  | -5.75662700 | -4.27469100 | Zn            | -1.92125400 | 2.36833500  | 0.49827000  |
| C | 3.92465200  | -0.88149500 | -0.91906900 | C             | 2.51965500  | 4.54915500  | 0.84970100  |
| C | 4.89158900  | -0.90206500 | 0.09807500  | C             | 3.32326800  | 4.35953400  | 1.98563300  |
| C | 4.34163800  | -0.76590500 | -2.25363700 | C             | 3.00016000  | 5.37067500  | -0.18298200 |
| C | 6.25191100  | -0.82929800 | -0.21499400 | C             | 4.57339000  | 4.97646000  | 2.08835100  |
| H | 4.57860900  | -0.98613000 | 1.13634100  | H             | 2.96006300  | 3.73018300  | 2.79416300  |
| C | 5.70083700  | -0.68774600 | -2.56482900 | C             | 4.25200200  | 5.98473200  | -0.08398400 |

|   |             |             |             |                |              |             |             |
|---|-------------|-------------|-------------|----------------|--------------|-------------|-------------|
| H | 2.38952900  | 5.52129100  | -1.06963100 | C              | -8.61775000  | 5.89982700  | 2.33383800  |
| C | 5.04240000  | 5.79056400  | 1.05288100  | C              | -8.69488700  | 5.13000400  | 0.04752900  |
| H | 5.17882100  | 4.82176600  | 2.97812300  | C              | -10.01142300 | 5.83496400  | 2.40349300  |
| H | 4.60906400  | 6.61332700  | -0.89611000 | H              | -8.04622200  | 6.22024500  | 3.20058900  |
| H | 6.01513400  | 6.26953200  | 1.13115000  | C              | -10.08920000 | 5.07098000  | 0.11310300  |
| C | -6.39117900 | 0.16492300  | 0.18815500  | H              | -8.18537100  | 4.85353300  | -0.87234000 |
| C | -6.86682200 | -0.64550900 | 1.23197600  | C              | -10.75296700 | 5.42342000  | 1.29227000  |
| C | -7.20036700 | 0.33699500  | -0.94691300 | H              | -10.51729000 | 6.10626200  | 3.32686600  |
| C | -8.11641400 | -1.26565900 | 1.14463500  | H              | -10.65627100 | 4.74828000  | -0.75675700 |
| H | -6.25245500 | -0.78471600 | 2.11802400  | H              | -11.83766000 | 5.37449700  | 1.34526700  |
| C | -8.44963200 | -0.28342700 | -1.03740400 | C              | -6.31979000  | 8.08484500  | 1.46783200  |
| H | -6.84141900 | 0.95683900  | -1.76495800 | C              | -5.95411600  | 8.88720700  | 2.56454900  |
| C | -8.91205600 | -1.08706700 | 0.00904200  | C              | -7.23306500  | 8.61333500  | 0.53757600  |
| H | -8.46755600 | -1.88736800 | 1.96459600  | C              | -6.49683500  | 10.16291200 | 2.73660000  |
| H | -9.05934700 | -0.14054800 | -1.92638400 | H              | -5.25753200  | 8.50331300  | 3.30619400  |
| H | -9.88360900 | -1.56993200 | -0.05973200 | C              | -7.77022700  | 9.89114000  | 0.70380200  |
| C | -2.03187400 | -3.15049200 | -0.40314100 | H              | -7.51915700  | 8.01627200  | -0.32318100 |
| C | -0.67439500 | -3.25988000 | -0.41963600 | C              | -7.40684000  | 10.67150600 | 1.80558000  |
| C | 0.04874500  | -4.53709300 | -0.68314300 | H              | -6.20891400  | 10.75781600 | 3.59999300  |
| C | 1.03629000  | -5.00528100 | 0.20325500  | H              | -8.47260200  | 10.27763400 | -0.03063400 |
| C | -0.19881300 | -5.28213600 | -1.85041500 | H              | -7.82677600  | 11.66555900 | 1.93622100  |
| C | 1.73755000  | -6.18510100 | -0.05728000 | C              | 0.23083700   | -2.05885600 | -0.22124300 |
| H | 1.24346700  | -4.45644100 | 1.11889000  | H              | 0.89322600   | -2.00741400 | -1.09916900 |
| C | 0.50649000  | -6.45726200 | -2.11601700 | H              | 0.91125800   | -2.28069900 | 0.61449800  |
| H | -0.94744100 | -4.93242100 | -2.55501300 | C              | -4.19929700  | 6.72798000  | 1.23897300  |
| C | 1.47644500  | -6.91607600 | -1.21965800 | H              | -3.83933300  | 7.16144800  | 2.18380700  |
| H | 2.48636500  | -6.53303600 | 0.65015700  | H              | -3.88846000  | 7.45675300  | 0.47429000  |
| H | 0.29867100  | -7.01374000 | -3.02664000 |                |              |             |             |
| H | 2.02416500  | -7.83213200 | -1.42561000 |                |              |             |             |
| C | -2.96207700 | -4.31144600 | -0.55222600 | <b>syn-5aa</b> |              |             |             |
| C | -2.95786300 | -5.36240900 | 0.37851800  | C              | 0.26290500   | 0.32954100  | 0.16709700  |
| C | -3.88569800 | -4.35676900 | -1.61013300 | C              | 1.69514000   | 0.27732800  | 0.13252700  |
| C | -3.84406300 | -6.43468600 | 0.25059500  | C              | 2.13580200   | 1.55976300  | 0.34761900  |
| H | -2.25475800 | -5.33577200 | 1.20652300  | C              | 0.97166900   | 2.39546900  | 0.51953700  |
| C | -4.76858200 | -5.43133000 | -1.74315100 | N              | -0.15984500  | 1.61138100  | 0.39950000  |
| H | -3.90517800 | -3.54862500 | -2.33726100 | H              | 2.28884800   | -0.60874200 | -0.04618100 |
| C | -4.75134400 | -6.47454200 | -0.81218300 | H              | 3.16149300   | 1.90055400  | 0.37344800  |
| H | -3.82495300 | -7.23886400 | 0.98210000  | C              | -0.63351500  | -0.75247100 | -0.01906600 |
| H | -5.47052200 | -5.45211700 | -2.57329000 | C              | -2.02375900  | -0.71196600 | -0.03395400 |
| H | -5.44037500 | -7.30933000 | -0.91290700 | C              | -2.79884300  | -1.90864200 | -0.25347200 |
| H | -1.56491300 | 7.57554600  | 1.40784400  | C              | -4.12334400  | -1.51448500 | -0.19432800 |
| C | -6.44710500 | 5.60151500  | 1.08489100  | H              | -4.99876700  | -2.13581400 | -0.31290800 |
| C | -5.71603000 | 6.73582400  | 1.26989700  | C              | -5.27969400  | 0.72977400  | 0.17106700  |
| C | -7.93993500 | 5.55405700  | 1.15410400  | C              | -5.25101800  | 2.12869400  | 0.39054200  |
|   |             |             |             | C              | -6.39466000  | 2.98934900  | 0.56642500  |

|    |              |             |             |   |              |             |             |
|----|--------------|-------------|-------------|---|--------------|-------------|-------------|
| C  | -4.47576800  | 4.16027700  | 0.72735700  | C | 0.87692300   | -6.28047600 | -1.81471300 |
| H  | -7.42664500  | 2.67050200  | 0.55536100  | H | -0.91870100  | -5.17847300 | -2.24752300 |
| C  | -3.66662700  | 5.27062400  | 0.94578500  | C | 2.03123400   | -6.36293500 | -1.02999200 |
| C  | -2.25029500  | 5.31937700  | 0.97075300  | H | 3.17030500   | -5.44229200 | 0.55720000  |
| C  | -1.43190000  | 6.47211300  | 1.20905000  | H | 0.68542300   | -7.02470100 | -2.58345800 |
| C  | -0.15137000  | 4.62582300  | 0.87598100  | H | 2.73742400   | -7.17556200 | -1.17977300 |
| C  | 0.98356900   | 3.79079500  | 0.75114600  | C | -2.90617600  | -4.41868900 | -0.56948900 |
| N  | -2.82841500  | 0.36421800  | 0.14852600  | C | -2.77637200  | -5.45666600 | 0.36771300  |
| N  | -4.09073700  | 2.88053000  | 0.49650000  | C | -3.84265500  | -4.56276900 | -1.60719800 |
| N  | -1.46630400  | 4.21413000  | 0.77103300  | C | -3.54883000  | -6.61514600 | 0.26068700  |
| C  | -5.91352700  | 4.26992200  | 0.77029400  | H | -2.06639100  | -5.35173200 | 1.18369600  |
| C  | -0.12922000  | 6.04175100  | 1.15453600  | C | -4.61426300  | -5.72252000 | -1.71606700 |
| C  | -4.13358600  | -0.09389100 | 0.05361800  | H | -3.95908200  | -3.76457700 | -2.33601500 |
| H  | 0.76086600   | 6.63807400  | 1.29916500  | C | -4.46908700  | -6.75366300 | -0.78286000 |
| Zn | -2.11979900  | 2.27606200  | 0.45352200  | H | -3.43406900  | -7.40800400 | 0.99568100  |
| C  | 2.32679600   | 4.44681300  | 0.87758600  | H | -5.32911900  | -5.81889200 | -2.52955400 |
| C  | 3.12846500   | 4.22609700  | 2.00950100  | H | -5.07131400  | -7.65486000 | -0.86537900 |
| C  | 2.80987700   | 5.29505800  | -0.13224700 | O | -0.03672200  | -1.97299400 | -0.22601900 |
| C  | 4.37865700   | 4.83924200  | 2.13069600  | H | -1.79362400  | 7.47460800  | 1.39255400  |
| H  | 2.76331900   | 3.57599200  | 2.80046000  | C | -6.50986500  | 5.55487400  | 1.03720200  |
| C  | 4.06219800   | 5.90466200  | -0.01494700 | C | -5.65828400  | 6.61820000  | 1.20791500  |
| H  | 2.20123000   | 5.46923600  | -1.01584600 | O | -4.29374800  | 6.47303100  | 1.16996100  |
| C  | 4.85028200   | 5.67987900  | 1.11786800  | C | -7.99117800  | 5.66168700  | 1.17046800  |
| H  | 4.98224700   | 4.66084100  | 3.01727800  | C | -8.58334400  | 6.07533800  | 2.37471800  |
| H  | 4.42148700   | 6.55366800  | -0.80983400 | C | -8.82614700  | 5.29836400  | 0.10027700  |
| H  | 5.82335100   | 6.15560000  | 1.21047300  | C | -9.97276400  | 6.14061300  | 2.50067700  |
| C  | -6.62128900  | 0.07261000  | 0.05606300  | H | -7.94921600  | 6.34484000  | 3.21508400  |
| C  | -7.09635100  | -0.78090000 | 1.06601200  | C | -10.21604300 | 5.36675100  | 0.22441900  |
| C  | -7.43509400  | 0.29328400  | -1.06797800 | H | -8.38145500  | 4.96945900  | -0.83564400 |
| C  | -8.34715300  | -1.39498100 | 0.95666200  | C | -10.79441500 | 5.78953700  | 1.42526900  |
| H  | -6.48022200  | -0.95720700 | 1.94414800  | H | -10.41296500 | 6.46270700  | 3.44112000  |
| C  | -8.68572200  | -0.32058600 | -1.18049900 | H | -10.84622100 | 5.08818400  | -0.61666000 |
| H  | -7.07762100  | 0.94607800  | -1.86057400 | H | -11.87581300 | 5.83967800  | 1.52369900  |
| C  | -9.14643800  | -1.16728500 | -0.16765000 | C | -6.01055100  | 8.03627700  | 1.44866900  |
| H  | -8.69710700  | -2.04943400 | 1.75136600  | C | -5.26402200  | 8.79526500  | 2.36885700  |
| H  | -9.29782100  | -0.13965400 | -2.06095200 | C | -7.05494000  | 8.66254300  | 0.74667600  |
| H  | -10.11917300 | -1.64510400 | -0.25356300 | C | -5.56887700  | 10.13789700 | 2.59580400  |
| C  | -2.11263100  | -3.16275500 | -0.44116100 | H | -4.44885400  | 8.32533100  | 2.91071800  |
| C  | -0.73973700  | -3.13321800 | -0.43571200 | C | -7.35397700  | 10.00693900 | 0.97222000  |
| C  | 0.19724800   | -4.26146700 | -0.64116100 | H | -7.62695700  | 8.09946800  | 0.01680200  |
| C  | 1.36936100   | -4.34428100 | 0.13323000  | C | -6.61622200  | 10.74915200 | 1.89951200  |
| C  | -0.03254500  | -5.23911100 | -1.62473900 | H | -4.98754700  | 10.70654300 | 3.31719800  |
| C  | 2.27445500   | -5.38922400 | -0.05627600 | H | -8.16131400  | 10.47637300 | 0.41601200  |
| H  | 1.56351200   | -3.58941500 | 0.88907100  | H | -6.85205100  | 11.79575700 | 2.07413600  |

*anti-5aa*

C 0.34972400 0.43935100 0.04588100  
C 1.77831200 0.34161200 -0.06330900  
C 2.26744900 1.61199800 0.09399400  
C 1.13748100 2.49217200 0.30547800  
N -0.02095200 1.74338800 0.26659800  
H 2.33449600 -0.56694500 -0.25035100  
H 3.30259100 1.92175000 0.05608400  
C -0.58295400 -0.61250100 -0.06427500  
C -1.97639200 -0.52754100 -0.00597100  
C -2.79715500 -1.70060000 -0.15669100  
C -4.10580500 -1.26254200 -0.03907100  
H -5.00461800 -1.85822200 -0.09957500  
C -5.16135800 1.03096100 0.33923500  
C -5.08001800 2.43103400 0.53143600  
C -6.20992700 3.31128000 0.74335200  
C -4.29165400 4.48270900 0.79953600  
H -7.24565200 3.00276500 0.77413800  
C -3.35882700 5.53375600 0.91589200  
C -1.96647100 5.45370000 0.82812000  
C -1.14414600 6.62153700 1.00938300  
C 0.11473900 4.76411800 0.65885100  
C 1.21870300 3.89185900 0.50000400  
N -2.73545600 0.57619300 0.19347900  
N -3.92142200 3.17953000 0.57310000  
N -1.20805600 4.35169400 0.61627400  
C -5.72048600 4.58093000 0.90513600  
C 0.16483200 6.17987400 0.91066100  
C -4.05735600 0.15909700 0.17774400  
H -6.27771500 5.49146900 1.07891000  
H 1.06502500 6.76735100 1.01636600  
Zn -1.97144000 2.46315600 0.41009400  
C 2.58498900 4.50678200 0.54908600  
C 3.43798900 4.27876800 1.64170200  
C 3.04065300 5.32823800 -0.49558100  
C 4.71008700 4.85592900 1.68991000  
H 3.09527200 3.65048700 2.45996100  
C 4.31385600 5.90295800 -0.45128400  
H 2.39316800 5.50744100 -1.35026800  
C 5.15284400 5.66954200 0.64266100  
H 5.35332000 4.67109700 2.54684500  
H 4.65061600 6.53047600 -1.27297900  
H 6.14271000 6.11750100 0.67854800

C -6.52758000 0.41472100 0.30115800  
C -6.97590800 -0.40573700 1.34975300  
C -7.38737800 0.63996900 -0.78681700  
C -8.24839300 -0.98264600 1.31350900  
H -6.32281400 -0.58469600 2.20012400  
C -8.65937100 0.06184200 -0.82619600  
H -7.05064300 1.26818000 -1.60768100  
C -9.09453200 -0.75134700 0.22464900  
H -8.57829400 -1.61114600 2.13714800  
H -9.30851500 0.24595800 -1.67886900  
H -10.08413400 -1.20042300 0.19556400  
C -3.14534800 7.91342900 1.31811800  
C -1.77439900 7.89126300 1.28038400  
C -0.92606300 9.08465800 1.56163900  
C -0.99421200 9.74766400 2.79779200  
C -0.00072500 9.53771000 0.60596400  
C -0.17230500 10.84457300 3.06531000  
H -1.69497300 9.39836400 3.55126900  
C 0.81999600 10.63658800 0.87192900  
H 0.06769400 9.03028500 -0.35305400  
C 0.73614800 11.29507100 2.10261200  
H -0.23992400 11.34509800 4.02805000  
H 1.52516800 10.97702400 0.11761600  
H 1.37624300 12.14852700 2.31115400  
C -4.03182300 9.07950800 1.53568200  
C -5.17572300 8.94583200 2.34424300  
C -3.78121200 10.31801800 0.92008200  
C -6.03164000 10.02853500 2.54983000  
H -5.38563000 7.99115800 2.81696700  
C -4.64176700 11.39764500 1.12390900  
H -2.91745900 10.43322200 0.27378700  
C -5.76745800 11.25971500 1.94168500  
H -6.90544600 9.90980800 3.18550800  
H -4.43480600 12.34671600 0.63609800  
H -6.43553400 12.10251300 2.09936000  
C -2.16406000 -2.98320900 -0.34828400  
C -0.79394600 -3.00107900 -0.41446300  
C 0.09372000 -4.16538200 -0.63611900  
C 1.30492700 -4.26411300 0.07375000  
C -0.22230100 -5.16454300 -1.57315500  
C 2.16394200 -5.34432300 -0.13181800  
H 1.56572500 -3.49323800 0.79240300  
C 0.64093300 -6.24155600 -1.77919700  
H -1.13911900 -5.09301500 -2.14849100

|   |             |             |             |
|---|-------------|-------------|-------------|
| C | 1.83477200  | -6.33901700 | -1.05788700 |
| H | 3.09101000  | -5.40853000 | 0.43222800  |
| H | 0.38237400  | -7.00200900 | -2.51157900 |
| H | 2.50493100  | -7.17926500 | -1.22022900 |
| C | -3.00652100 | -4.21236700 | -0.40168300 |
| C | -2.87182200 | -5.22507400 | 0.56204200  |
| C | -3.99302500 | -4.35363900 | -1.39236400 |
| C | -3.68862800 | -6.35726400 | 0.52595100  |
| H | -2.12256100 | -5.12147500 | 1.34232800  |
| C | -4.80911200 | -5.48716000 | -1.43029500 |
| H | -4.11327400 | -3.57449300 | -2.14097600 |
| C | -4.65873000 | -6.49397300 | -0.47168800 |
| H | -3.56889600 | -7.13118300 | 1.28009700  |
| H | -5.56232400 | -5.58228100 | -2.20857100 |
| H | -5.29496100 | -7.37493200 | -0.49928700 |
| O | -3.89932900 | 6.77702300  | 1.14747100  |
| O | -0.04176100 | -1.85947000 | -0.27222000 |



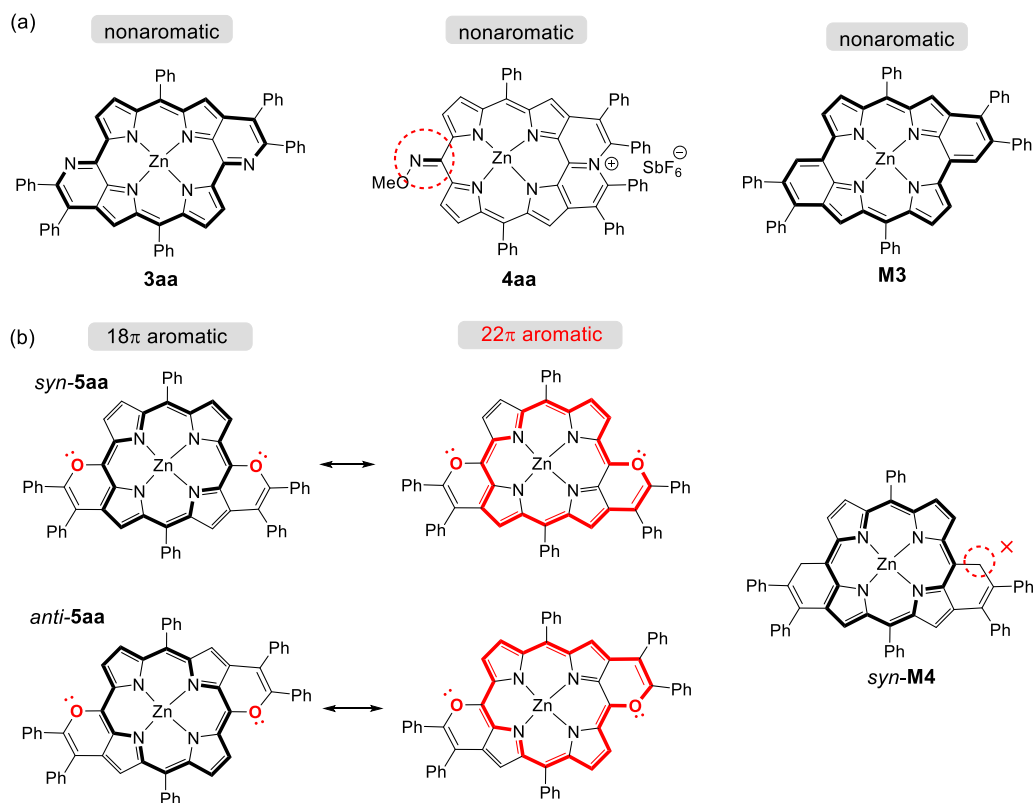

**Scheme S1.** The aromaticity of **3aa**, **4aa**, simulated **M3** and *syn-M4*, and the resonance structures of *syn-5aa* and *anti-5aa*.

### XIII. Optical properties of the representative products

**Table S3.** UV-*vis*-NIR absorption spectra measured in CH<sub>2</sub>Cl<sub>2</sub> solution (4.0 × 10<sup>-5</sup> M).

| Product    | $\lambda_{\text{abs}}/\text{nm}$ ( $\epsilon/10^3 \text{ M}^{-1} \text{ cm}^{-1}$ ) |           |            |
|------------|-------------------------------------------------------------------------------------|-----------|------------|
|            | B                                                                                   |           | Q          |
| <b>3aa</b> | 448 (51.6)                                                                          |           | 631 (28.4) |
| <b>3ad</b> | 454 (50.2)                                                                          | -         | 642 (32.0) |
| <b>3aj</b> | 444 (54.0)                                                                          | -         | 624 (30.9) |
| <b>3ak</b> | 441 (52.2)                                                                          | -         | 616 (24.9) |
| <b>3ba</b> | 448 (71.6)                                                                          | -         | 632 (39.0) |
| <b>4aa</b> | 461 (55.0)                                                                          | 596 (8.4) | 730 (5.7)  |
| <b>4al</b> | 467 (13.4)                                                                          | 629 (3.0) | 751 (1.8)  |
| <b>4ah</b> | 466 (28.3)                                                                          | 625 (5.7) | 749 (3.3)  |
| <b>4an</b> | 460 (11.4)                                                                          | 600 (1.6) | 738 (1.0)  |

**Table S4.** Photophysical data of *syn-5ah*, *anti-5ah*, **5ea**, **5eh** and **6** measured in CH<sub>2</sub>Cl<sub>2</sub> solution (1.0 × 10<sup>-5</sup> M).

| Product         | $\lambda_{\text{abs}}/\text{nm}$ ( $\epsilon / 10^4 \text{ M}^{-1} \text{ cm}^{-1}$ ) |
|-----------------|---------------------------------------------------------------------------------------|
| <i>syn-5ah</i>  | 456 (7.98), 582 (0.89), 631, (1.93), 741 (0.57)                                       |
| <i>anti-5ah</i> | 448 (15.19), 548 (0.99), 587 (1.16), 612 (0.93), 670, (3.70), 881(0.40)               |
| <b>5ea</b>      | 467 (20.26), 593 (2.37), 624 (2.69)                                                   |
| <b>5eh</b>      | 466 (21.40), 592 (2.47), 622 (2.77)                                                   |
| <b>6</b>        | 548 (8.44), 622 (9.02), 799 (2.48), 1005 (2.82), 1113 (5.0)                           |

#### XIV. Cyclic voltammogram measurements

General procedure: Cyclic voltammogram measurements were conducted on LK2005A using a platinum plate working electrode, an Ag/Ag<sup>+</sup> (0.01 M of AgNO<sub>3</sub> in CH<sub>3</sub>CN) reference electrode, and a platinum wire counter electrode. Electrochemical experiments were carried out in dry HPLC grade CH<sub>3</sub>CN or CH<sub>2</sub>Cl<sub>2</sub> using ferrocene/ferrocenium as reference. Unless otherwise stated, the cyclic voltammogram measurements were performed at a scan rate of 50 mV/s and the supporting electrolyte was tetrabutylammonium hexafluorophosphate (TBAPF<sub>6</sub>, 0.1 M) in all cases.

**Table S5.** Electrochemical properties of **3aa**, **4aa**, *syn-5ah* and *anti-5ah*.

| Compound        | $E_{\text{ox}, 1}$ | $E_{\text{ox}, 2}$ | $E_{\text{ox}, 3}$ | $E_{\text{red}, 1}$ | $E_{\text{red}, 2}$ | $E_{\text{red}, 3}$ | $E_{\text{ox}, 1} - E_{\text{red}, 1}$ |
|-----------------|--------------------|--------------------|--------------------|---------------------|---------------------|---------------------|----------------------------------------|
| <b>3aa</b>      | 0.30               | 0.55               |                    |                     |                     |                     |                                        |
| <b>4aa</b>      | 0.34               | 0.63               | 0.97               | -0.76               | -1.06               | -1.45               | 1.10                                   |
| <i>syn-5ah</i>  | 0.15               | 0.77               | 1.18               | -1.58               | -1.98               |                     | 1.73                                   |
| <i>anti-5ah</i> | 0.07               | 0.49               |                    | -1.50               | -1.89               |                     | 1.57                                   |

$E_{\text{ox}, 1}$  and  $E_{\text{red}, 1}$  are the first oxidation and reduction potentials, respectively.  $E_{\text{ox}, 2}$  and  $E_{\text{red}, 2}$  are the potentials of the second oxidative and reductive redox wave, respectively, with potentials versus Fc/Fc<sup>+</sup> couple.  $E_{\text{ox}, 3}$  are the third oxidation potential, respectively.

## XV. Quantification of singlet oxygen generation

Singlet oxygen generation studies of *syn-5aI* and methylene blue (**MB**) were detected through monitoring the oxidation of 1,3-diphenylisobenzofuran (DPBF).<sup>11</sup> Specifically, an oxygen-saturated *N,N*-Dimethylformamide (DMF) solution of photosensitizer containing DPBF was prepared in the dark and irradiated with a 680 nm laser at a power of 150 mW cm<sup>-2</sup> in an interval of 30 s. DPBF oxidation was monitored by UV-Vis-NIR spectrophotometer. *Syn-5aI* exhibited good ability to sensitize the singlet oxygen (<sup>1</sup>O<sub>2</sub>), leading to obvious decrease in the absorbance of DPBF at 416 nm. The singlet oxygen quantum yields ( $\Phi_{\Delta}$ ) were obtained by the relative method using methylene blue (**MB**) in DMF ( $\Phi_{\Delta} = 0.52$ ) as the standard and calculated with eq. 1,<sup>11</sup>

$$\Phi_{\Delta} (^1\text{O}_2)^{\text{bod}} = \Phi_{\Delta} (^1\text{O}_2)^{\text{MB}} \frac{m^{\text{bod}}F^{\text{MB}}}{m^{\text{MB}}F^{\text{bod}}} \quad (\text{eq. 1})$$

where superscripts 'bod' and 'MB' represent sample and methylene blue (**MB**), respectively.  $\Phi_{\Delta} [^1\text{O}_2]$  is the quantum yield of singlet oxygen, 'm' is the slope of a plot of difference in change in absorbance of DPBF (at 416 nm) with the irradiation time and 'F' is the absorption correction factor, which is given by  $F = 1 - 10^{-\text{OD}}$  (OD represents the optical density of sample and **MB** at or 680 nm).

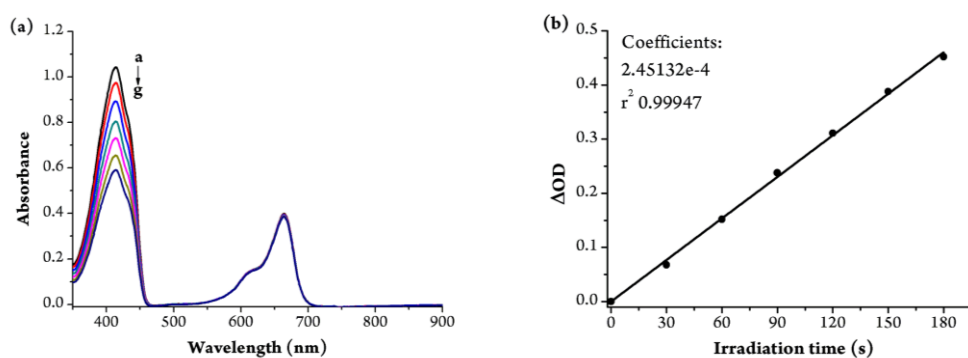

**Figure S7.** (a) Changes in the absorption spectrum of DPBF at 416 nm upon irradiation in the presence of **MB**. a) 0 and g) 180 s (recorded at every 30 s intervals). (b) Plot of change in absorbance of DPBF at 416 nm vs irradiation time ( $\lambda_{\text{irr}} = 635$  nm) in the presence of **MB**.

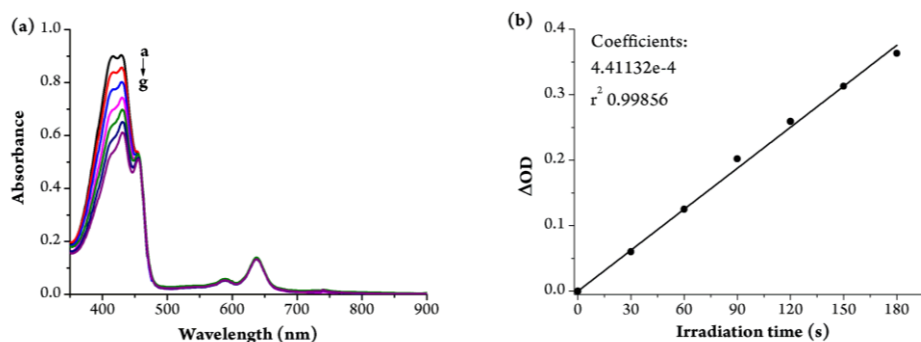

**Figure S8.** (a) Changes in the absorption spectrum of DPBF at 416 nm upon irradiation in the presence of *syn-5af*. a) 0 and g) 180 s (recorded at every 30 s intervals). (b) Plot of change in absorbance of DPBF at 416 nm vs irradiation time ( $\lambda_{irr} = 635$  nm) in the presence of *syn-5af*.

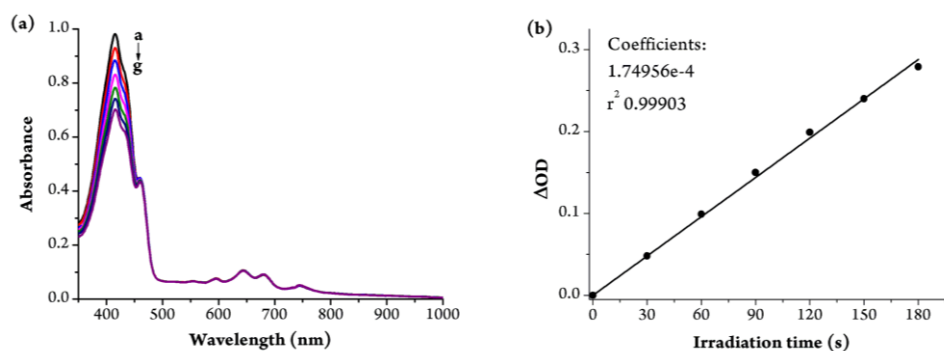

**Figure S9.** (a) Changes in the absorption spectrum of DPBF at 416 nm upon irradiation in the presence of *syn-5al*. a) 0 and g) 180 s (recorded at every 30 s intervals). (b) Plot of change in absorbance of DPBF at 416 nm vs irradiation time ( $\lambda_{irr} = 635$  nm) in the presence of *syn-5al*.

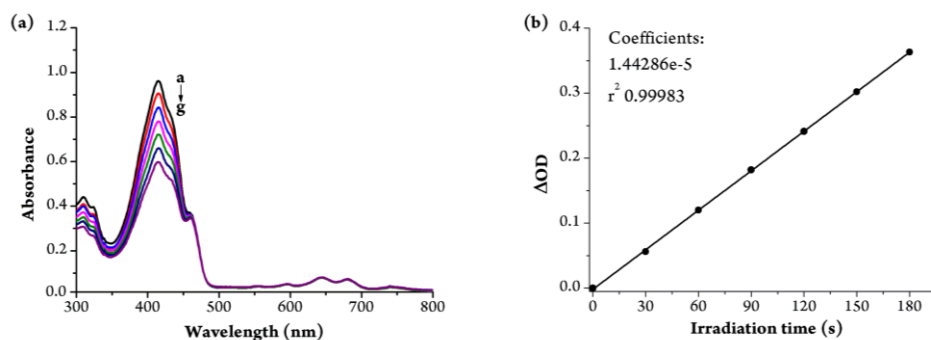

**Figure S10.** (a) Changes in the absorption spectrum of DPBF at 416 nm upon irradiation ( $\lambda_{irr} = 680$  nm) in the presence of *syn-5al*. a) 0 and g) 150 s (recorded at every 30 s intervals). (b) Plot of change in absorbance of DPBF at 416 nm vs irradiation time ( $\lambda_{irr} = 680$  nm) in the presence of *syn-5al*.

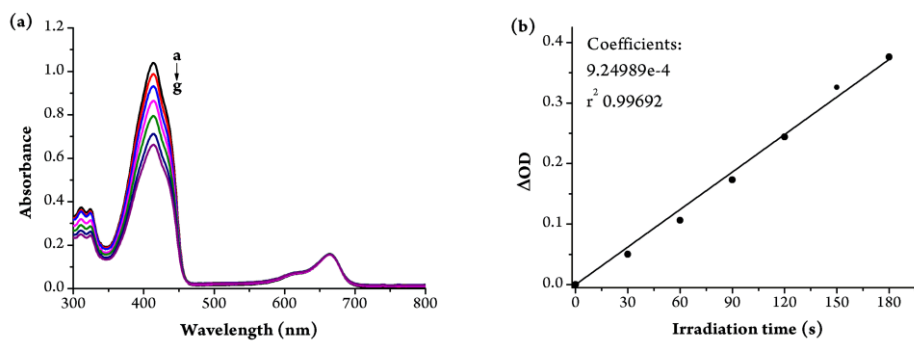

**Figure S11.** (a) Changes in the absorption spectrum of DPBF at 416 nm upon irradiation ( $\lambda_{irr} = 680$  nm) in the presence of **MB**. a) 0 and g) 180 s (recorded at every 30 s intervals). (b) Plot of change in absorbance of DPBF at 416 nm vs irradiation time ( $\lambda_{irr} = 680$  nm) in the presence of **MB**.

## XVI. Single crystal X-ray structures of Zn1a, 3aa, 4ah, *syn*-5aa, *syn*-5af, *syn*- and *anti*-5ah

**Table S6.** Crystal Data and Structure Refinement for **Zn1a**

|                                             |                                                                  |
|---------------------------------------------|------------------------------------------------------------------|
| Identification code                         | <b>Zn1a</b>                                                      |
| Empirical formula                           | C <sub>34</sub> H <sub>24</sub> N <sub>6</sub> O <sub>2</sub> Zn |
| Formula weight                              | 613.96                                                           |
| Temperature/K                               | 296.4(5)                                                         |
| Crystal system                              | monoclinic                                                       |
| Space group                                 | C2/c                                                             |
| a/Å                                         | 11.1672(4)                                                       |
| b/Å                                         | 27.7657(7)                                                       |
| c/Å                                         | 9.6241(3)                                                        |
| α/°                                         | 90                                                               |
| β/°                                         | 114.758(4)                                                       |
| γ/°                                         | 90                                                               |
| Volume/Å <sup>3</sup>                       | 2709.82(17)                                                      |
| Z                                           | 4                                                                |
| ρ <sub>calc</sub> /cm <sup>3</sup>          | 1.505                                                            |
| μ/mm <sup>-1</sup>                          | 1.625                                                            |
| F(000)                                      | 1264.0                                                           |
| Crystal size/mm <sup>3</sup>                | 0.45 × 0.2 × 0.1                                                 |
| Radiation                                   | CuKα (λ = 1.54184)                                               |
| 2θ range for data collection/°              | 9.284 to 145.704                                                 |
| Index ranges                                | -13 ≤ h ≤ 13, -32 ≤ k ≤ 34, -7 ≤ l ≤ 11                          |
| Reflections collected                       | 7639                                                             |
| Independent reflections                     | 2670 [R <sub>int</sub> = 0.0263, R <sub>sigma</sub> = 0.0250]    |
| Data/restraints/parameters                  | 2670/7/199                                                       |
| Goodness-of-fit on F <sup>2</sup>           | 1.040                                                            |
| Final R indexes [I ≥ 2σ (I)]                | R <sub>1</sub> = 0.0623, wR <sub>2</sub> = 0.1746                |
| Final R indexes [all data]                  | R <sub>1</sub> = 0.0706, wR <sub>2</sub> = 0.1856                |
| Largest diff. peak/hole / e Å <sup>-3</sup> | 0.96/-0.61                                                       |

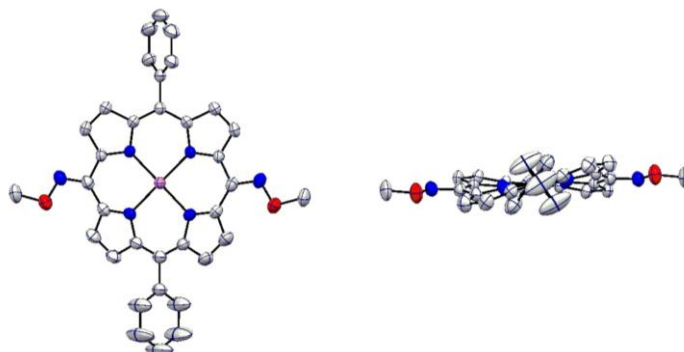

**Table S7.** Crystal Data and Structure Refinement for **3aa**

|                                             |                                                               |
|---------------------------------------------|---------------------------------------------------------------|
| Identification code                         | <b>3aa</b>                                                    |
| Empirical formula                           | C <sub>70</sub> H <sub>46</sub> N <sub>8</sub> Zn             |
| Formula weight                              | 1064.57                                                       |
| Temperature/K                               | 150                                                           |
| Crystal system                              | triclinic                                                     |
| Space group                                 | P-1                                                           |
| a/Å                                         | 10.1189(3)                                                    |
| b/Å                                         | 16.2647(5)                                                    |
| c/Å                                         | 19.3022(6)                                                    |
| α/°                                         | 67.268(3)                                                     |
| β/°                                         | 82.291(3)                                                     |
| γ/°                                         | 82.584(3)                                                     |
| Volume/Å <sup>3</sup>                       | 2893.15(16)                                                   |
| Z                                           | 1                                                             |
| ρ <sub>calc</sub> /cm <sup>3</sup>          | 1.359                                                         |
| μ/mm <sup>-1</sup>                          | 2.268                                                         |
| F(000)                                      | 1220.0                                                        |
| Crystal size/mm <sup>3</sup>                | 0.6 × 0.3 × 0.3                                               |
| Radiation                                   | CuKα (λ = 1.54184)                                            |
| 2θ range for data collection/°              | 8.85 to 127.382                                               |
| Index ranges                                | -11 ≤ h ≤ 11, -18 ≤ k ≤ 18, -22 ≤ l ≤ 18                      |
| Reflections collected                       | 28348                                                         |
| Independent reflections                     | 9511 [R <sub>int</sub> = 0.0469, R <sub>sigma</sub> = 0.0379] |
| Data/restraints/parameters                  | 9511/0/751                                                    |
| Goodness-of-fit on F <sup>2</sup>           | 1.352                                                         |
| Final R indexes [ I  ≥ 2σ (I)]              | R <sub>1</sub> = 0.0980, wR <sub>2</sub> = 0.2969             |
| Final R indexes [all data]                  | R <sub>1</sub> = 0.1104, wR <sub>2</sub> = 0.3133             |
| Largest diff. peak/hole / e Å <sup>-3</sup> | 1.90/-1.16                                                    |

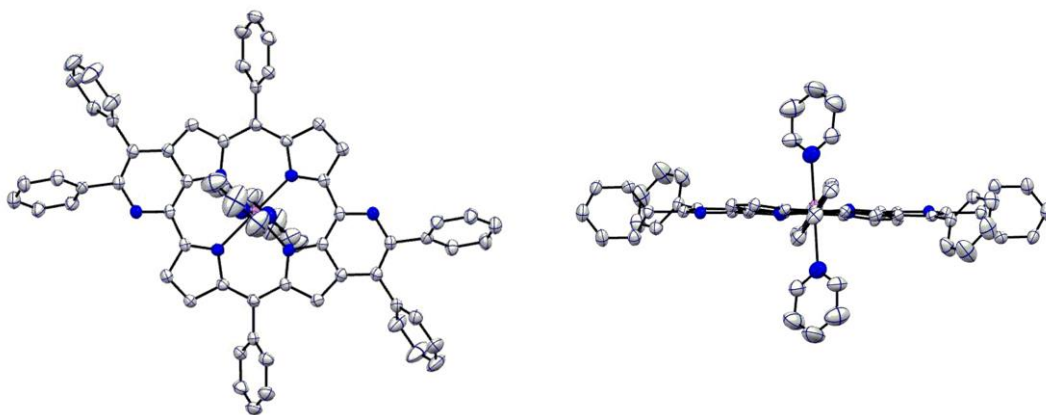

**Table S8.** Crystal Data and Structure Refinement for **4ah**

|                                               |                                                                    |
|-----------------------------------------------|--------------------------------------------------------------------|
| Identification code                           | <b>4ah</b>                                                         |
| Empirical formula                             | $C_{65}H_{39}F_{10}N_6O_2SbZn$                                     |
| Formula weight                                | 1313.19                                                            |
| Temperature/K                                 | 150                                                                |
| Crystal system                                | monoclinic                                                         |
| Space group                                   | $P2_1/c$                                                           |
| $a/\text{\AA}$                                | 20.2843(2)                                                         |
| $b/\text{\AA}$                                | 17.94042(16)                                                       |
| $c/\text{\AA}$                                | 17.71991(20)                                                       |
| $\alpha/^\circ$                               | 90                                                                 |
| $\beta/^\circ$                                | 104.6455(12)                                                       |
| $\gamma/^\circ$                               | 90                                                                 |
| Volume/ $\text{\AA}^3$                        | 6238.92(12)                                                        |
| Z                                             | 4                                                                  |
| $\rho_{\text{calc}}/\text{g/cm}^3$            | 1.569                                                              |
| $\mu/\text{mm}^{-1}$                          | 5.419                                                              |
| F(000)                                        | 2976.0                                                             |
| Crystal size/ $\text{mm}^3$                   | 0.3 × 0.2 × 0.1                                                    |
| Radiation                                     | $\text{CuK}\alpha$ ( $\lambda = 1.54184$ )                         |
| $2\theta$ range for data collection/ $^\circ$ | 9.012 to 145.488                                                   |
| Index ranges                                  | $-24 \leq h \leq 23$ , $-18 \leq k \leq 21$ , $-15 \leq l \leq 21$ |
| Reflections collected                         | 32809                                                              |
| Independent reflections                       | 11878 [ $R_{\text{int}} = 0.0386$ , $R_{\text{sigma}} = 0.0430$ ]  |
| Data/restraints/parameters                    | 11878/2/860                                                        |
| Goodness-of-fit on $F^2$                      | 1.026                                                              |
| Final R indexes [ $ I  \geq 2\sigma(I)$ ]     | $R_1 = 0.0570$ , $wR_2 = 0.1520$                                   |
| Final R indexes [all data]                    | $R_1 = 0.0694$ , $wR_2 = 0.1619$                                   |
| Largest diff. peak/hole / $e \text{\AA}^{-3}$ | 1.63/-1.47                                                         |

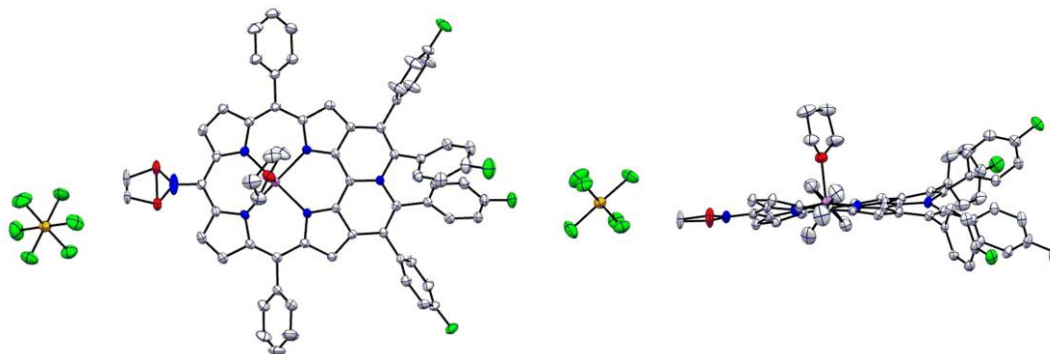



**Table S9.** Crystal Data and Structure Refinement for *syn-5aa*

|                                             |                                                                  |
|---------------------------------------------|------------------------------------------------------------------|
| Identification code                         | <i>syn-5aa</i>                                                   |
| Empirical formula                           | C <sub>64</sub> H <sub>44</sub> N <sub>4</sub> O <sub>3</sub> Zn |
| Formula weight                              | 982.40                                                           |
| Temperature/K                               | 293.75(10)                                                       |
| Crystal system                              | triclinic                                                        |
| Space group                                 | P-1                                                              |
| a/Å                                         | 13.4002(4)                                                       |
| b/Å                                         | 13.4625(4)                                                       |
| c/Å                                         | 17.1704(5)                                                       |
| α/°                                         | 103.438(2)                                                       |
| β/°                                         | 101.949(2)                                                       |
| γ/°                                         | 98.725(2)                                                        |
| Volume/Å <sup>3</sup>                       | 2881.73(15)                                                      |
| Z                                           | 2                                                                |
| ρ <sub>calc</sub> /cm <sup>3</sup>          | 1.132                                                            |
| μ/mm <sup>-1</sup>                          | 0.949                                                            |
| F(000)                                      | 1020.0                                                           |
| Crystal size/mm <sup>3</sup>                | 0.6 × 0.4 × 0.2                                                  |
| Radiation                                   | CuKα (λ = 1.54184)                                               |
| 2θ range for data collection/°              | 8.676 to 145.97                                                  |
| Index ranges                                | -16 ≤ h ≤ 16, -10 ≤ k ≤ 16, -21 ≤ l ≤ 21                         |
| Reflections collected                       | 31404                                                            |
| Independent reflections                     | 11234 [R <sub>int</sub> = 0.0613, R <sub>sigma</sub> = 0.0615]   |
| Data/restraints/parameters                  | 11234/237/711                                                    |
| Goodness-of-fit on F <sup>2</sup>           | 1.016                                                            |
| Final R indexes [I ≥ 2σ (I)]                | R <sub>1</sub> = 0.0824, wR <sub>2</sub> = 0.2351                |
| Final R indexes [all data]                  | R <sub>1</sub> = 0.1050, wR <sub>2</sub> = 0.2705                |
| Largest diff. peak/hole / e Å <sup>-3</sup> | 30.86/-0.40                                                      |

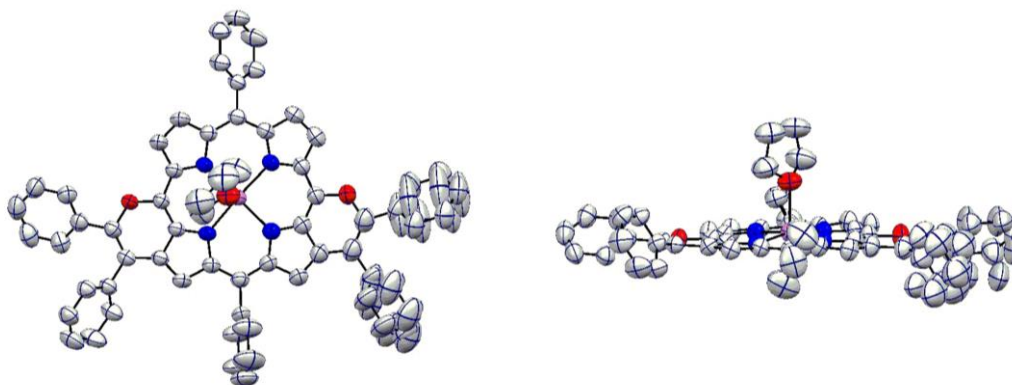

**Table S10.** Crystal Data and Structure Refinement for *syn-5af*

|                                             |                                                                                  |
|---------------------------------------------|----------------------------------------------------------------------------------|
| Identification code                         | <b><i>syn-5af</i></b>                                                            |
| Empirical formula                           | C <sub>65</sub> H <sub>37</sub> Cl <sub>4</sub> N <sub>5</sub> O <sub>2</sub> Zn |
| Formula weight                              | 1127.16                                                                          |
| Temperature/K                               | 293.15                                                                           |
| Crystal system                              | monoclinic                                                                       |
| Space group                                 | P2 <sub>1</sub> /c                                                               |
| a/Å                                         | 13.4669(11)                                                                      |
| b/Å                                         | 28.4544(20)                                                                      |
| c/Å                                         | 17.1786(14)                                                                      |
| α/°                                         | 90                                                                               |
| β/°                                         | 109.813(9)                                                                       |
| γ/°                                         | 90                                                                               |
| Volume/Å <sup>3</sup>                       | 6193.0(9)                                                                        |
| Z                                           | 4                                                                                |
| ρ <sub>calc</sub> /g/cm <sup>3</sup>        | 1.209                                                                            |
| μ/mm <sup>-1</sup>                          | 0.614                                                                            |
| F(000)                                      | 2304.0                                                                           |
| Crystal size/mm <sup>3</sup>                | 0.4 × 0.35 × 0.3                                                                 |
| Radiation                                   | MoKα (λ = 0.71073)                                                               |
| 2θ range for data collection/°              | 5.798 to 52.744                                                                  |
| Index ranges                                | -16 ≤ h ≤ 16, -35 ≤ k ≤ 20, -21 ≤ l ≤ 20                                         |
| Reflections collected                       | 29117                                                                            |
| Independent reflections                     | 12644 [R <sub>int</sub> = 0.0356, R <sub>sigma</sub> = 0.0484]                   |
| Data/restraints/parameters                  | 12644/0/694                                                                      |
| Goodness-of-fit on F <sup>2</sup>           | 1.052                                                                            |
| Final R indexes [I ≥ 2σ (I)]                | R <sub>1</sub> = 0.0487, wR <sub>2</sub> = 0.1224                                |
| Final R indexes [all data]                  | R <sub>1</sub> = 0.0712, wR <sub>2</sub> = 0.1345                                |
| Largest diff. peak/hole / e Å <sup>-3</sup> | 0.52/-0.37                                                                       |

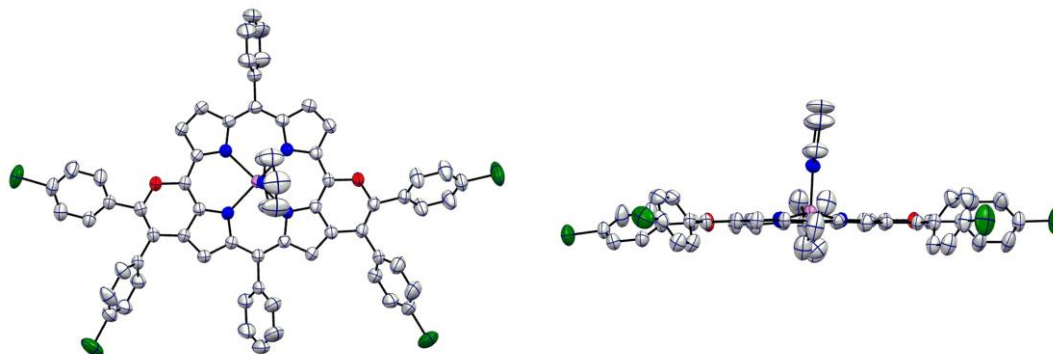

**Table S11.** Crystal Data and Structure Refinement for *syn-5ah*

|                                                |                                                                   |
|------------------------------------------------|-------------------------------------------------------------------|
| Identification code                            | <b><i>syn-5ah</i></b>                                             |
| Empirical formula                              | $C_{64}H_{40}F_4N_4O_3Zn$                                         |
| Formula weight                                 | 1054.37                                                           |
| Temperature/K                                  | 293.15                                                            |
| Crystal system                                 | triclinic                                                         |
| Space group                                    | P-1                                                               |
| a/Å                                            | 13.4252(11)                                                       |
| b/Å                                            | 14.2425(13)                                                       |
| c/Å                                            | 14.4941(9)                                                        |
| $\alpha/^\circ$                                | 102.982(7)                                                        |
| $\beta/^\circ$                                 | 94.647(6)                                                         |
| $\gamma/^\circ$                                | 95.015(7)                                                         |
| Volume/Å <sup>3</sup>                          | 2675.7(4)                                                         |
| Z                                              | 2                                                                 |
| $\rho_{\text{calc}}/\text{g}/\text{cm}^3$      | 1.309                                                             |
| $\mu/\text{mm}^{-1}$                           | 0.523                                                             |
| F(000)                                         | 1084.0                                                            |
| Crystal size/mm <sup>3</sup>                   | 0.35 × 0.03 × 0.03                                                |
| Radiation                                      | MoK $\alpha$ ( $\lambda = 0.71073$ )                              |
| 2 $\theta$ range for data collection/ $^\circ$ | 5.8 to 52.74                                                      |
| Index ranges                                   | -16 ≤ h ≤ 15, -16 ≤ k ≤ 17, -17 ≤ l ≤ 18                          |
| Reflections collected                          | 22340                                                             |
| Independent reflections                        | 10919 [ $R_{\text{int}} = 0.1005$ , $R_{\text{sigma}} = 0.2786$ ] |
| Data/restraints/parameters                     | 10919/0/685                                                       |
| Goodness-of-fit on $F^2$                       | 0.862                                                             |
| Final R indexes [ $ I  \geq 2\sigma(I)$ ]      | $R_1 = 0.0874$ , $wR_2 = 0.1567$                                  |
| Final R indexes [all data]                     | $R_1 = 0.2308$ , $wR_2 = 0.2051$                                  |
| Largest diff. peak/hole / e Å <sup>-3</sup>    | 0.62/-0.47                                                        |

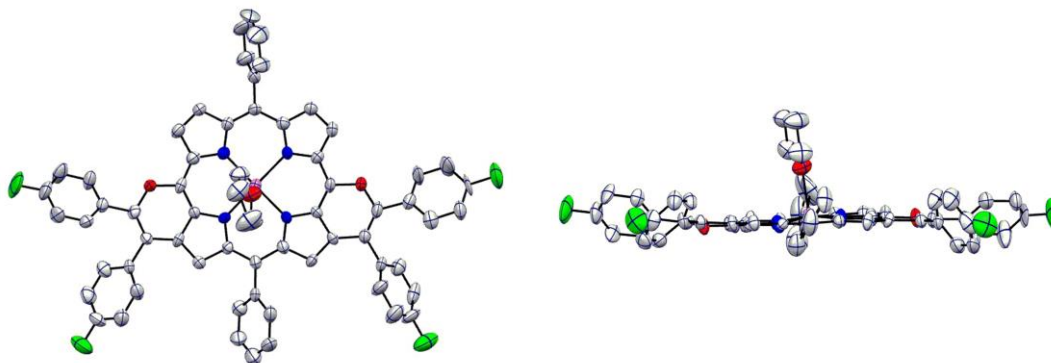

**Table S12.** Crystal Data and Structure Refinement for *anti-5ah*

|                                             |                                                                                 |
|---------------------------------------------|---------------------------------------------------------------------------------|
| Identification code                         | <i>anti-5ah</i>                                                                 |
| Empirical formula                           | C <sub>68</sub> H <sub>48</sub> F <sub>4</sub> N <sub>4</sub> O <sub>4</sub> Zn |
| Formula weight                              | 1126.47                                                                         |
| Temperature/K                               | 293.15                                                                          |
| Crystal system                              | triclinic                                                                       |
| Space group                                 | P-1                                                                             |
| a/Å                                         | 9.8040(6)                                                                       |
| b/Å                                         | 10.8952(7)                                                                      |
| c/Å                                         | 13.1775(9)                                                                      |
| α/°                                         | 73.385(6)                                                                       |
| β/°                                         | 77.153(5)                                                                       |
| γ/°                                         | 81.794(5)                                                                       |
| Volume/Å <sup>3</sup>                       | 1310.32(15)                                                                     |
| Z                                           | 1                                                                               |
| ρ <sub>calc</sub> /g/cm <sup>3</sup>        | 1.428                                                                           |
| μ/mm <sup>-1</sup>                          | 0.541                                                                           |
| F(000)                                      | 582.0                                                                           |
| Crystal size/mm <sup>3</sup>                | 0.35 × 0.08 × 0.03                                                              |
| Radiation                                   | MoKα (λ = 0.71073)                                                              |
| 2θ range for data collection/°              | 5.872 to 52.744                                                                 |
| Index ranges                                | -12 ≤ h ≤ 11, -13 ≤ k ≤ 13, -16 ≤ l ≤ 14                                        |
| Reflections collected                       | 10060                                                                           |
| Independent reflections                     | 5358 [R <sub>int</sub> = 0.0424, R <sub>sigma</sub> = 0.1166]                   |
| Data/restraints/parameters                  | 5358/0/361                                                                      |
| Goodness-of-fit on F <sup>2</sup>           | 1.035                                                                           |
| Final R indexes [I >= 2σ (I)]               | R <sub>1</sub> = 0.0806, wR <sub>2</sub> = 0.1882                               |
| Final R indexes [all data]                  | R <sub>1</sub> = 0.1428, wR <sub>2</sub> = 0.2328                               |
| Largest diff. peak/hole / e Å <sup>-3</sup> | 1.09/-1.02                                                                      |

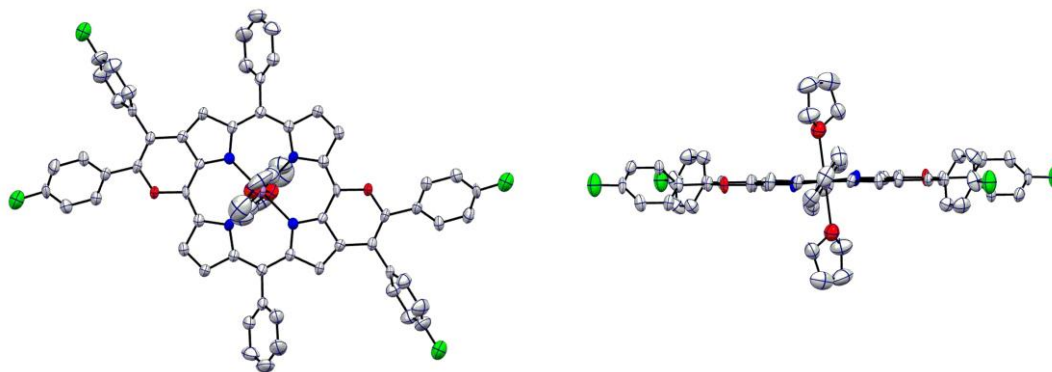

## XVII. References

1. J. W. Kang, K. Moseley and P. M. Maitlis, *J. Am. Chem. Soc.* 1969, **91**, 5970.
2. N. L. Bill, M. Ishida, S. Bähring, J. M. Lim, S. Lee, C. M. Davis, V. M. Lynch, K. A. Nielsen, J. O. Jeppesen, K. Ohkubo, S. Fukuzumi, D. Kim and J. L. Sessler, *J. Am. Chem. Soc.* 2013, **135**, 10852.
3. D.-M. Shen, C. Liu, X.-G. Chen and Q.-Y. Chen, *Synlett.* 2009, **6**, 945.
4. Y. Jun-i, N. Fukui, K. Furukawa and A. Osuka, *Chem. Eur. J.* 2018, **24**, 1528.
5. A. Yella, H.-W. Lee, H. N. Tsao, C. Yi, A. K. Chandiran, M. K. Nazeeruddin, E. W.-G. Diao, C.-Y. Yeh, S. M. Zakeeruddin and M. Grätzel, *Science* 2011, **334**, 629.
6. C.-H. Yeh, W.-C. Chen, P. Gandeepan, Y.-C. Hong, C.-H. Shih and C.-H. Cheng, *Org. Biomol. Chem.* 2014, **12**, 9105.
7. M. O. Senge, Y. M. Shaker, M. Pintea, C. Ryppa, S. S. Hatscher, A. Ryan and Y. Sergeeva, *Eur. J. Org. Chem.* 2010, 237.
8. M. J. Frisch, G. W. Trucks, H. B. Schlegel, G. E. Scuseria, M. A. Robb, J. R. Cheeseman, G. Scalmani, V. Barone, B. Mennucci, G. A. Petersson, H. Nakatsuji, M. Caricato, X. Li, H. P. Hratchian, A. F. Izmaylov, J. Bloino, G. Zheng, J. L. Sonnenberg, M. Hada, M. Ehara, K. Toyota, R. Fukuda, J. Hasegawa, M. Ishida, T. Nakajima, Y. Honda, O. Kitao, H. Nakai, T. Vreven, J. A. Jr. Montgomery, J. E. Peralta, F. Ogliaro, M. Bearpark, J. J. Heyd, E. Brothers, K. N. Kudin, V. N. Staroverov, R. Kobayashi, J. Normand, K. Raghavachari, A. Rendell, J. C. Burant, S. S. Iyengar, J. Tomasi, M. Cossi, N. Rega, N. J. Millam, M. Klene, J. E. Knox, J. B. Cross, V. Bakken, C. Adamo, J. Jaramillo, R. Gomperts, R. E. Stratmann, O. Yazyev, A. J. Austin, R. Cammi, C. Pomelli, J. W. Ochterski, R. L. Martin, K. Morokuma, V. G. Zakrzewski, G. A. Voth, P. Salvador, J. J. Dannenberg, S. Dapprich, A. D. Daniels, Ö. Farkas, J. B. Foresman, J. V. Ortiz, J. Cioslowski and D. J. Fox, *Gaussian 09*, Revision

D.01, Gaussian, Inc., Wallingford CT, 2009.

9. (a) A. D. Becke, *J. Chem. Phys.* 1993, **98**, 5648; (b) C. Lee, W. Yang and R. G. Parr, *Phys. Rev. B.* 1988, **37**, 785.

10. (a) P. J. Hay and W. R. Wadt, *J. Chem. Phys.* 1985, **82**, 270; (b) W. R. Wadt and P. J. Hay, *J. Chem. Phys.* 1985, **82**, 284; (c) P. J. Hay and W. R. Wadt, *J. Chem. Phys.* 1985, **82**, 299.

11. J. Tian, L. Ding, H.-J. Xu, Z. Shen, H. Ju, L. Jia, L. Bao and J.-S. Yu, *J. Am. Chem. Soc.* 2013, **135**, 18850.

## XVIII. Copies of NMR spectra

### $^1\text{H}$ NMR spectra of $\text{H}_2\text{DPP 1c}$ ( $\text{CDCl}_3$ )

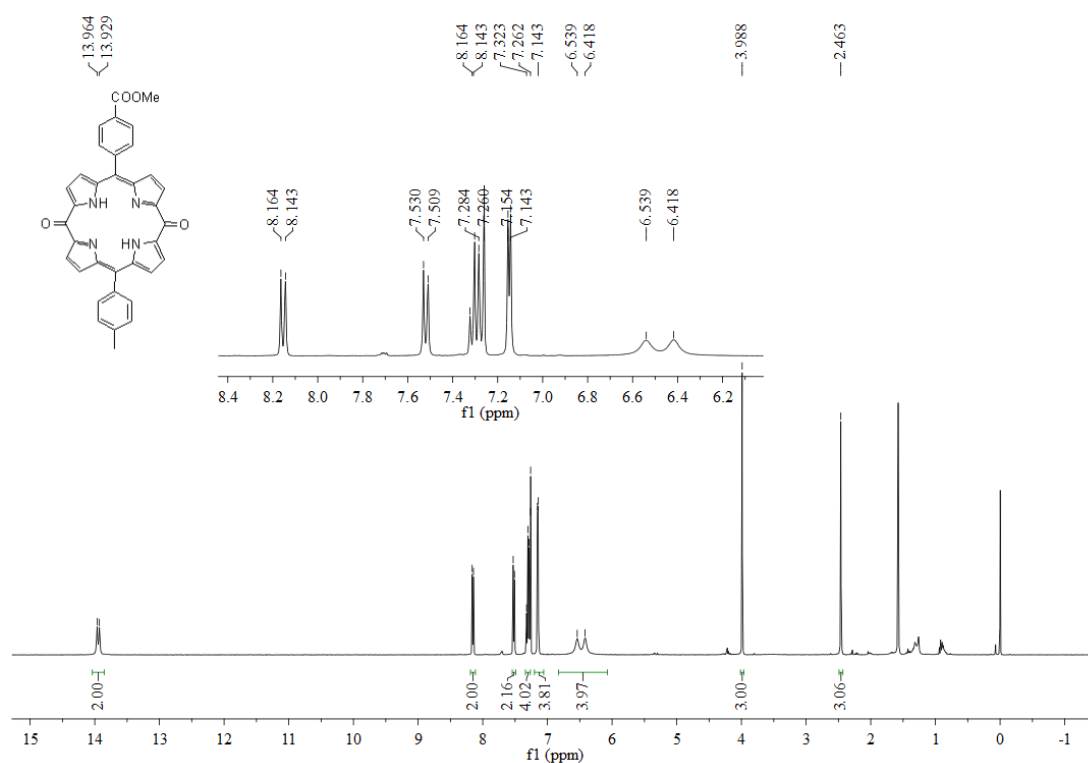

### $^1\text{H}$ NMR spectra of $\text{H}_2\text{DPP 2a}$ ( $\text{CDCl}_3$ )

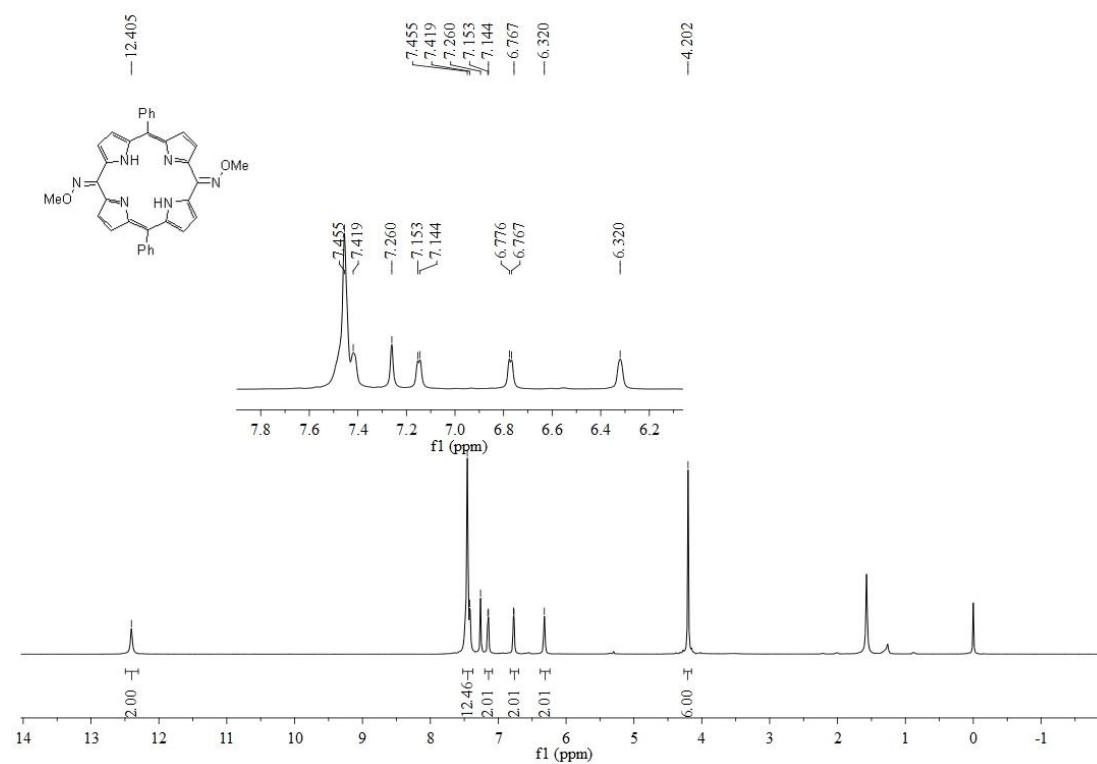

<sup>1</sup>H NMR spectra of H<sub>2</sub>DPP 2b (CDCl<sub>3</sub>)

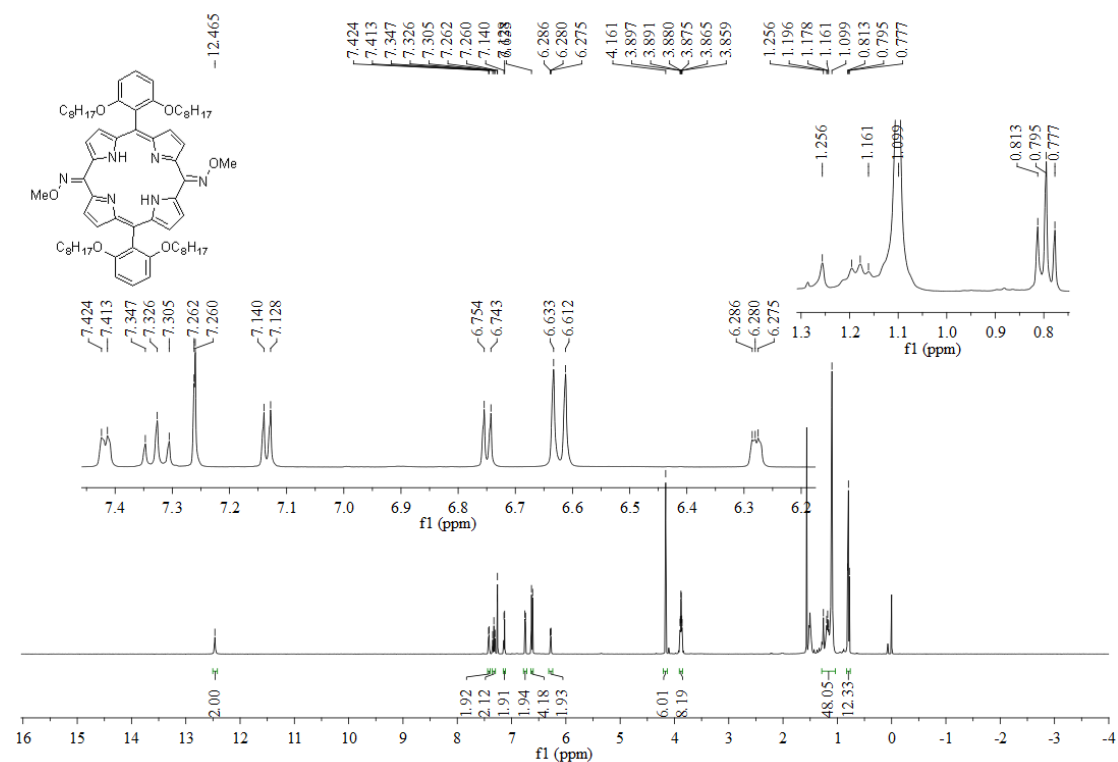

<sup>1</sup>H NMR spectra of H<sub>2</sub>DPP 2d (CDCl<sub>3</sub>)

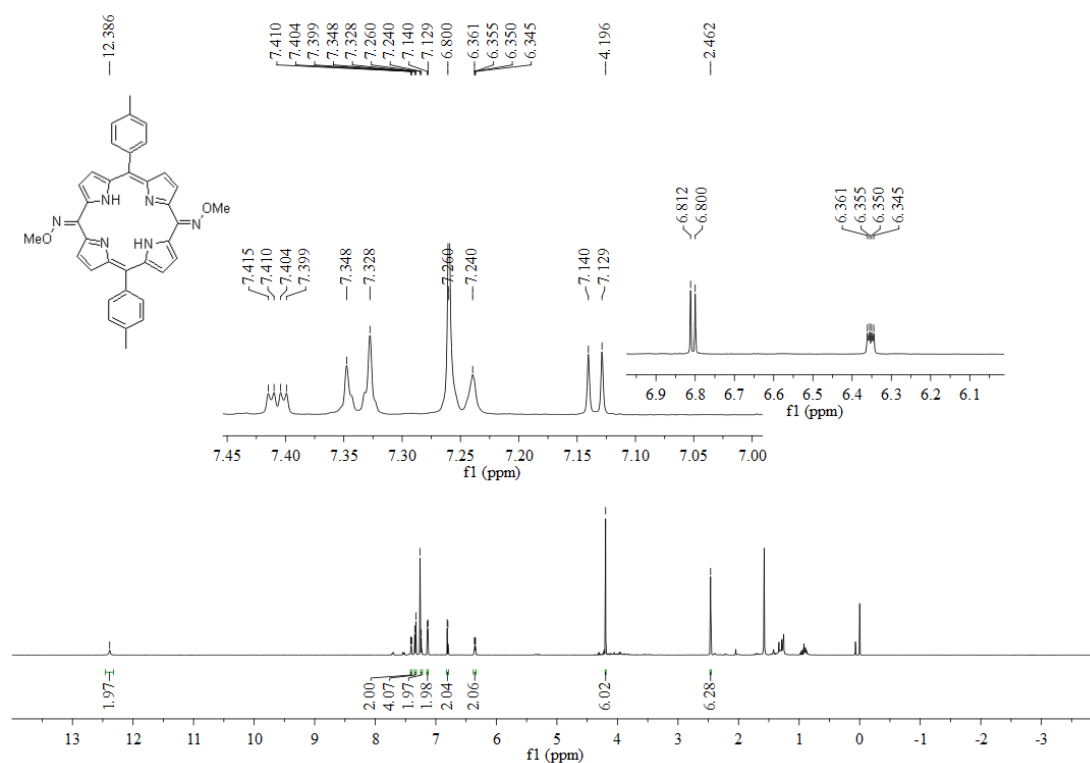



$^1\text{H}$  NMR spectra of **Zn1a** ( $\text{CDCl}_3$ ), \* represent solvent peak.

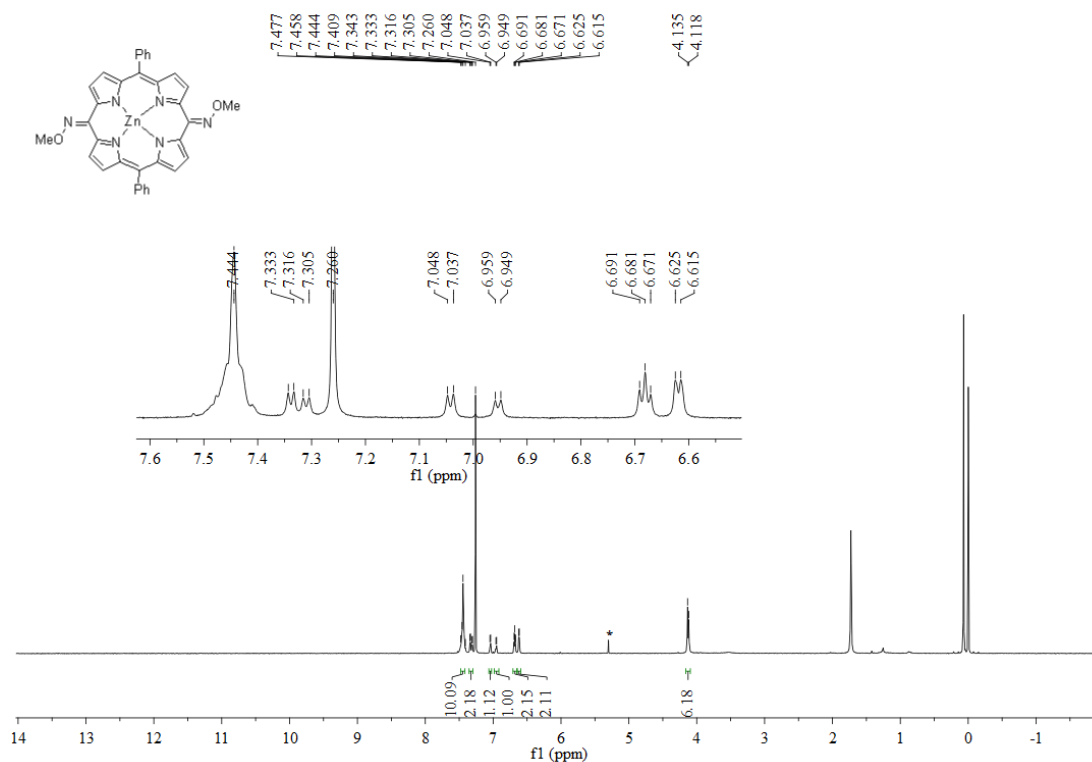

$^1\text{H}$  NMR spectra of **Zn1b** ( $\text{DMSO}-d_6$ )

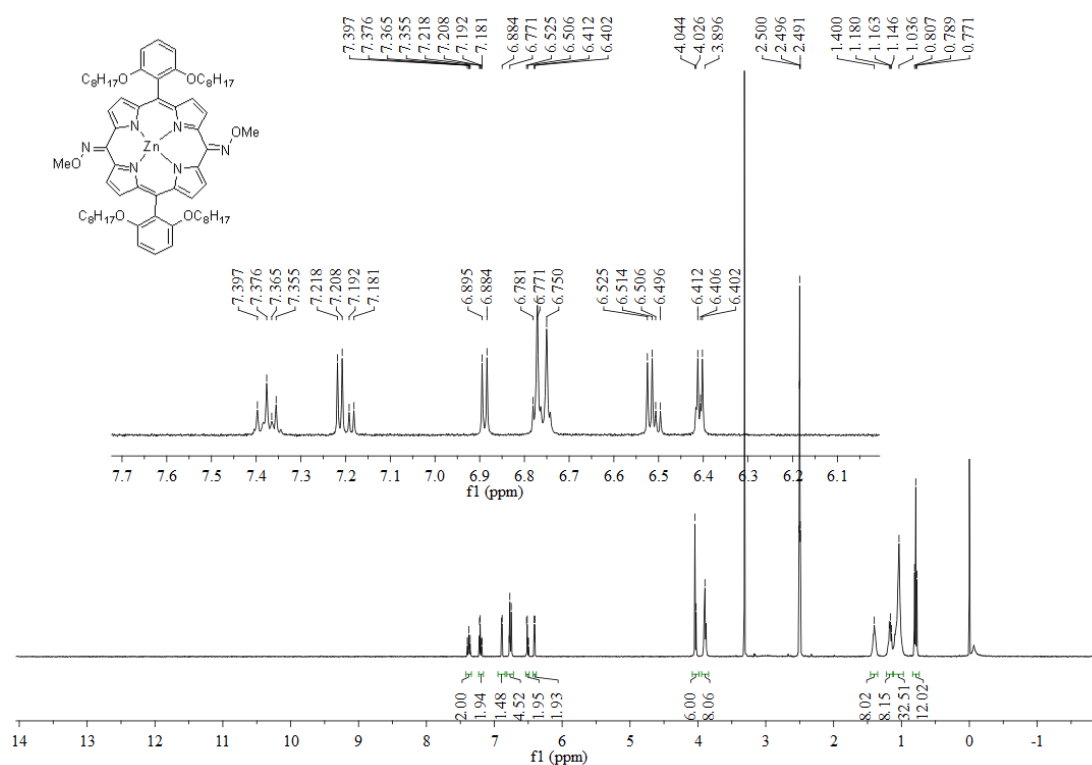

<sup>1</sup>H NMR spectra of **Zn1c** (CDCl<sub>3</sub>)

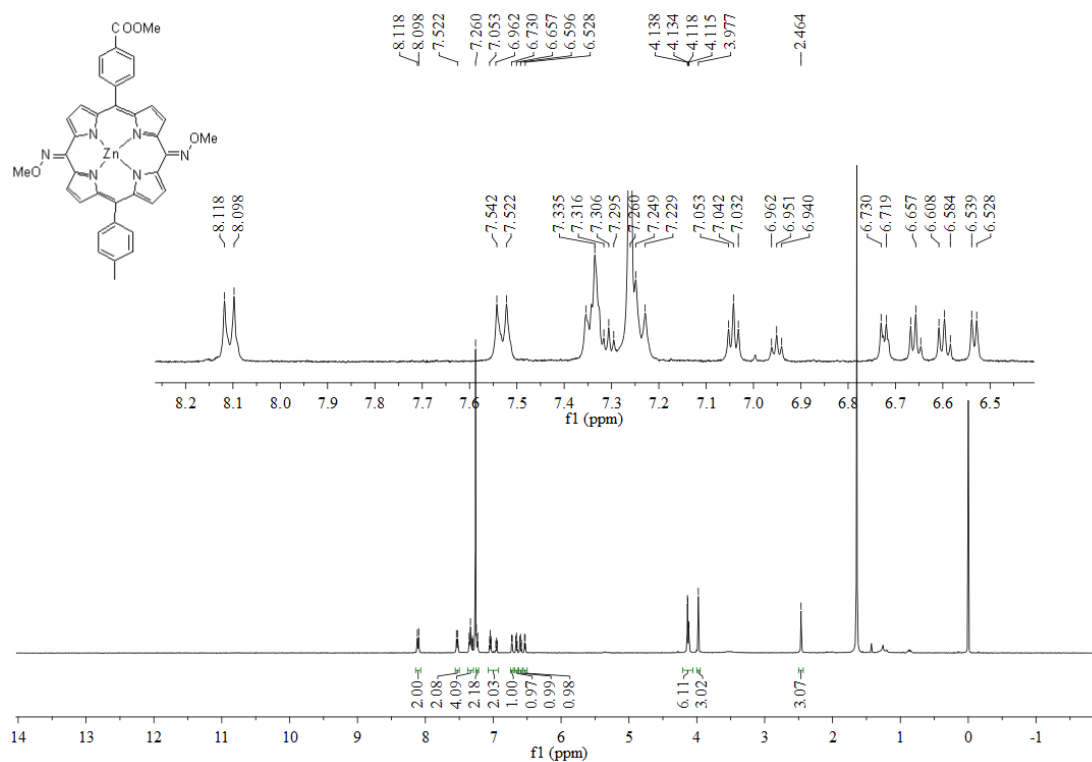

<sup>1</sup>H NMR spectra of **Zn1d** (DMSO-d<sub>6</sub>)

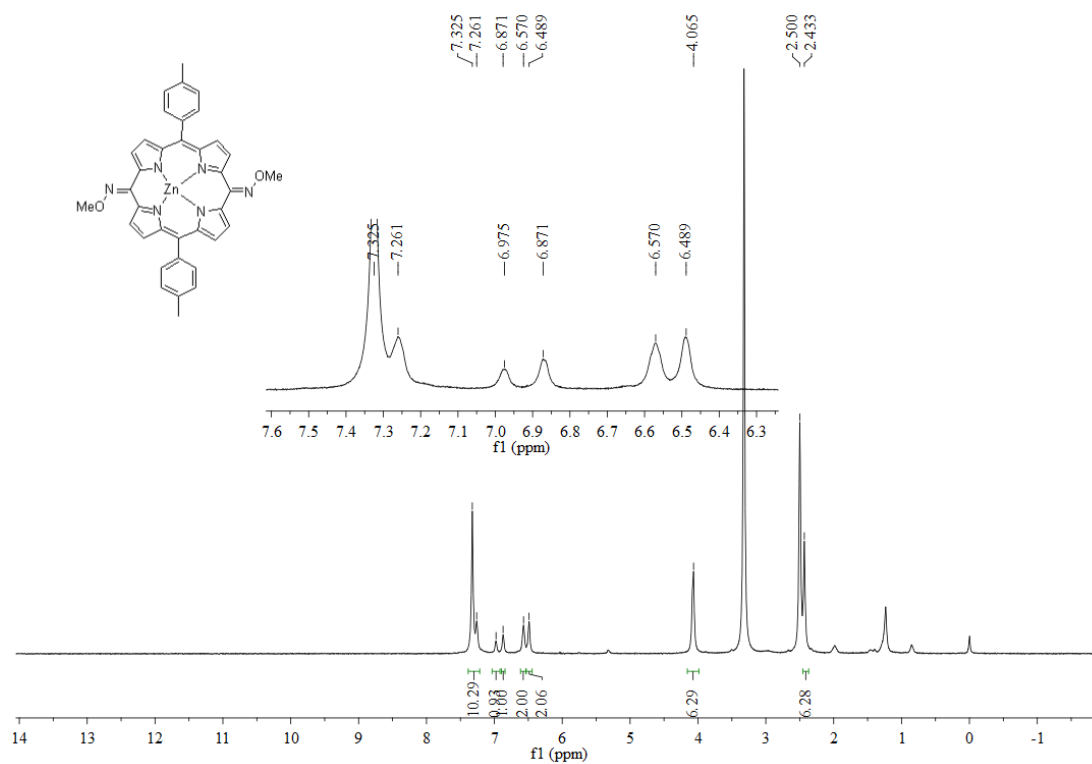

<sup>1</sup>H NMR spectra of **Zn2b** (CDCl<sub>3</sub>)

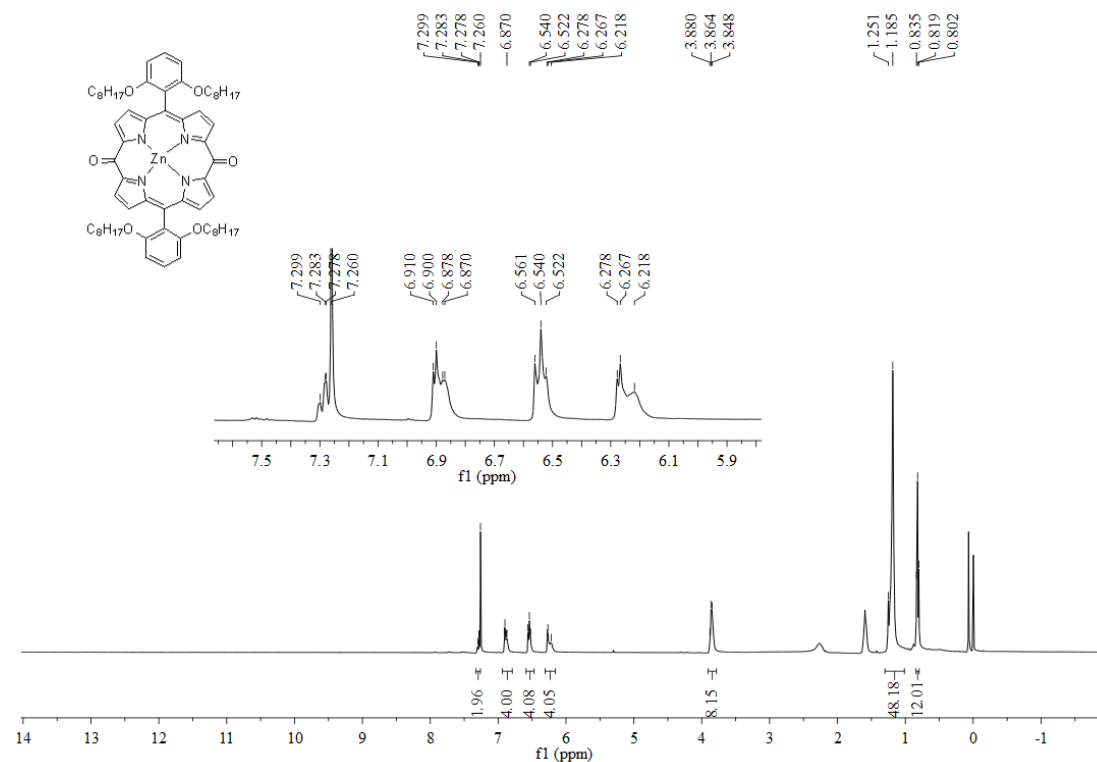

<sup>1</sup>H NMR spectra of **3aa** (DMSO-*d*<sub>6</sub>), \* represent solvent peak.

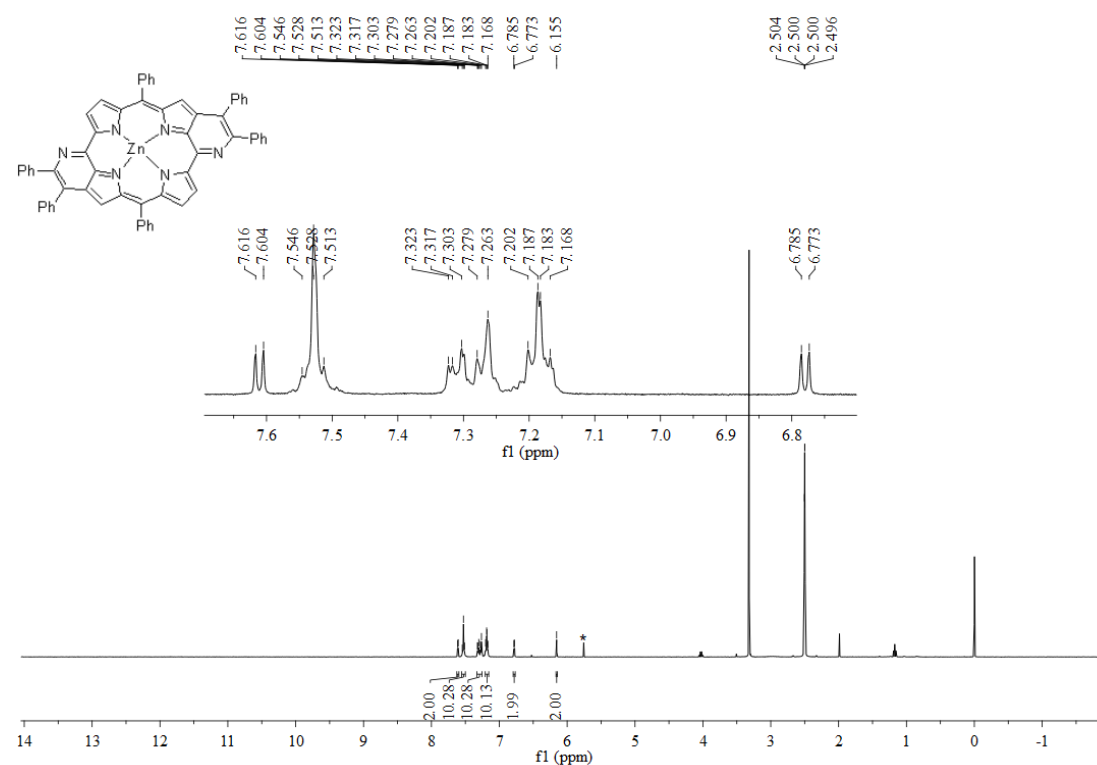

<sup>1</sup>H NMR spectra of **3ab** (DMSO-d<sub>6</sub>)

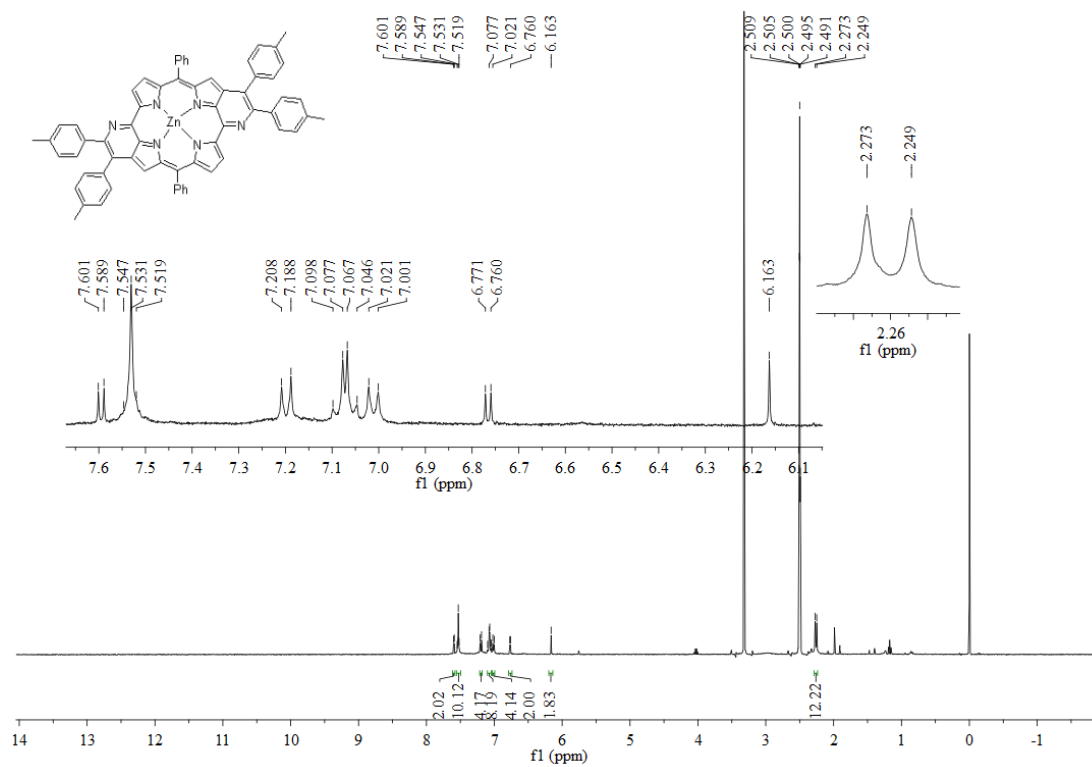

<sup>1</sup>H NMR spectra of **3ac** (DMSO-d<sub>6</sub>)

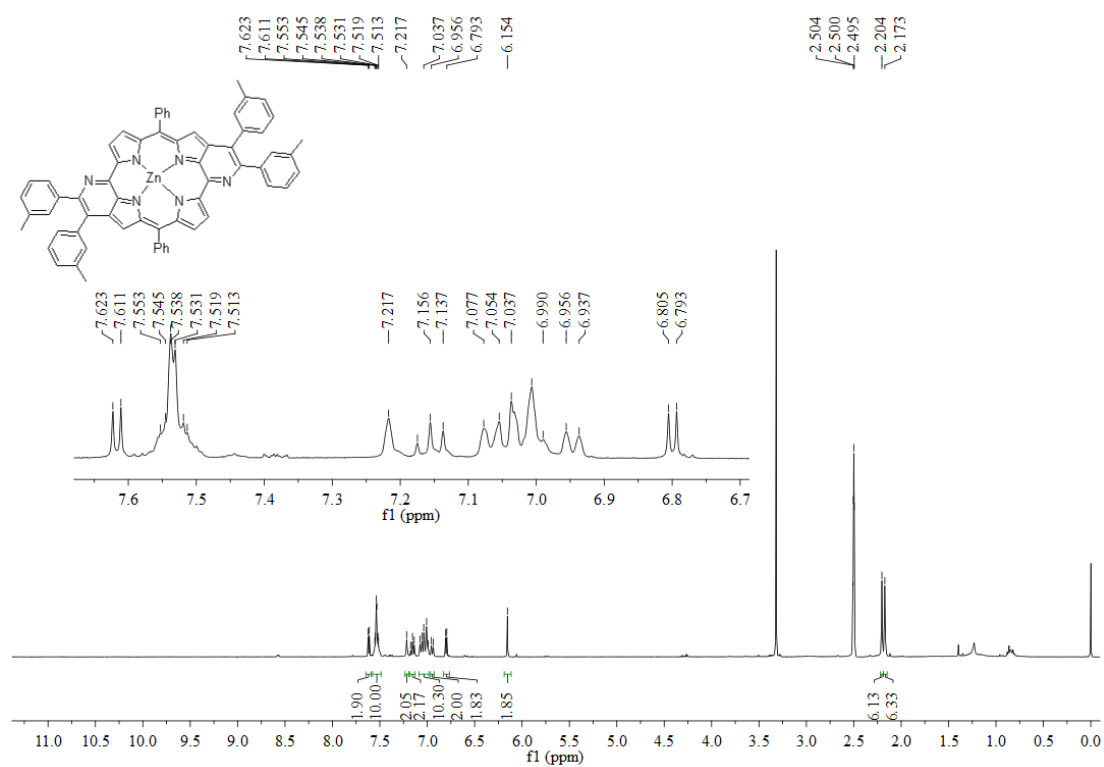

$^1\text{H}$  NMR spectra of **3ad** (DMSO- $d_6$ ), \* represent solvent peak.

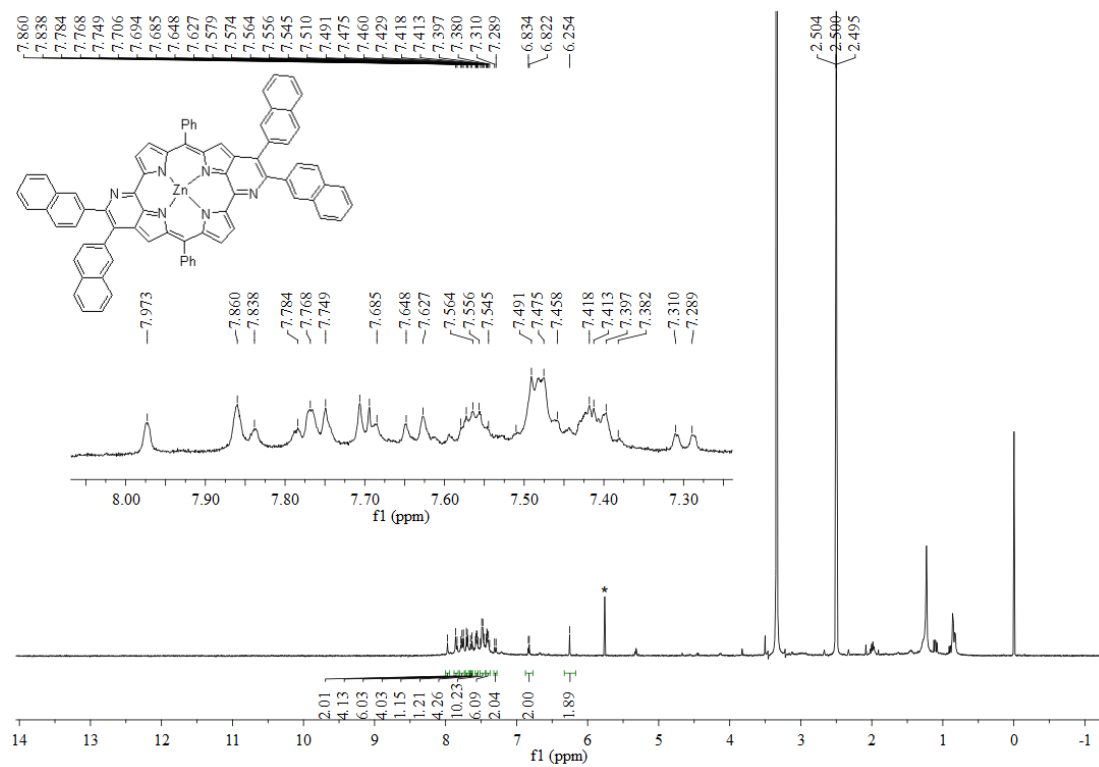

$^1\text{H}$  NMR spectra of **3ae** ( $\text{CDCl}_3$ )

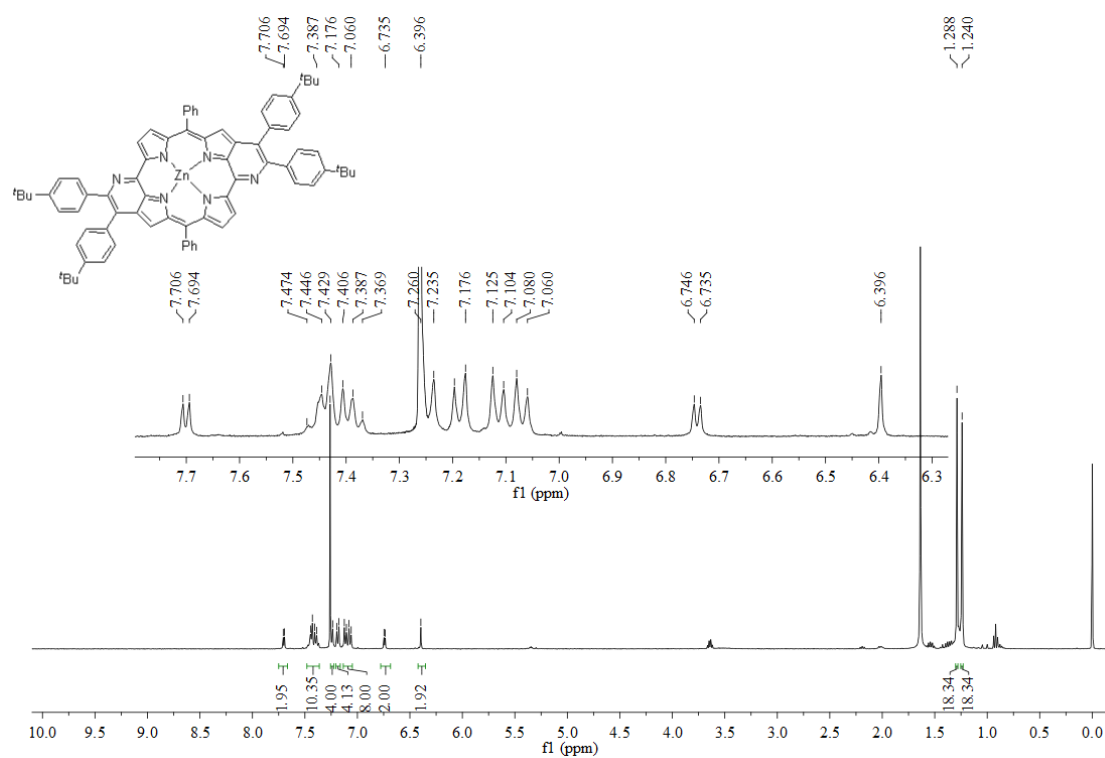

### $^1\text{H}$ NMR spectra of **3af** ( $\text{CDCl}_3$ )

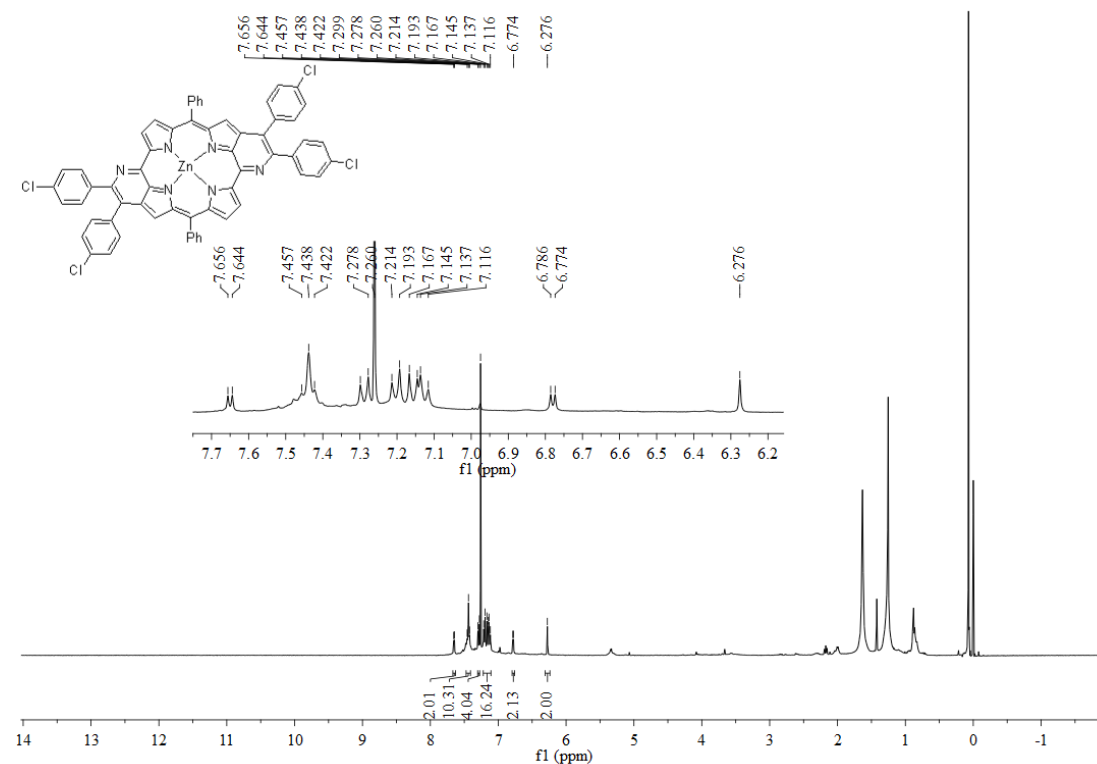

### $^1\text{H}$ NMR spectra of **3ah** ( $\text{DMSO-}d_6$ )

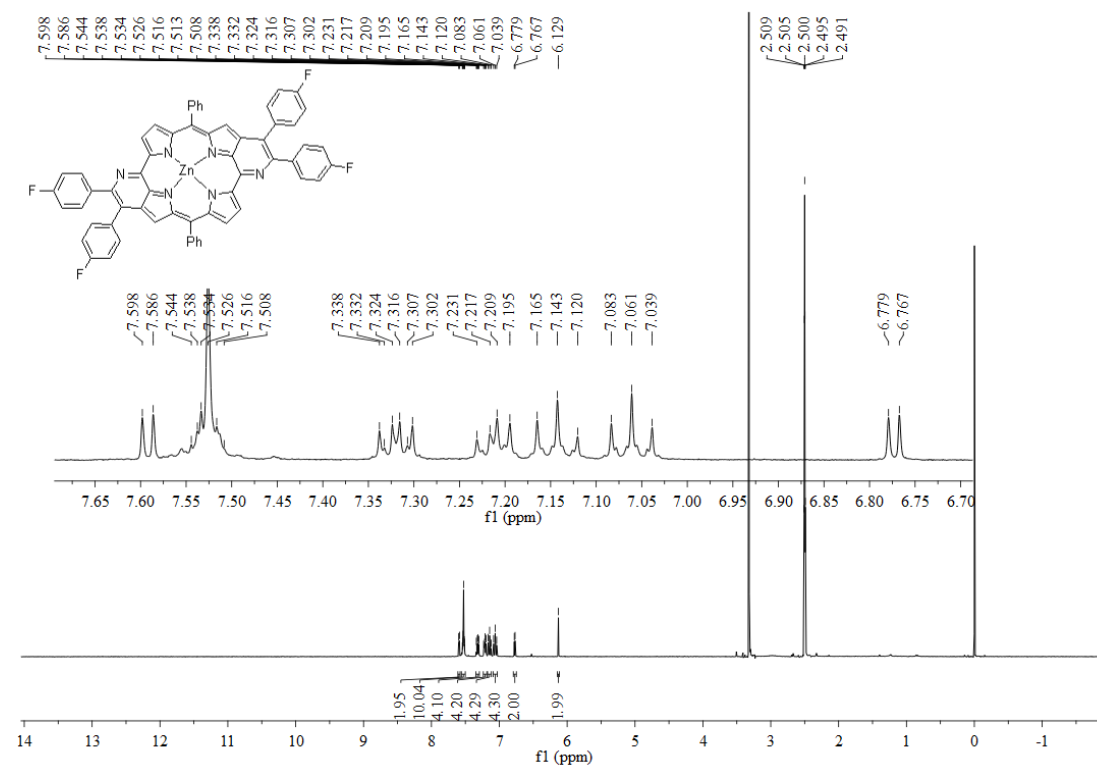

### <sup>1</sup>H NMR spectra of **3ai** (DMSO-d<sub>6</sub>)

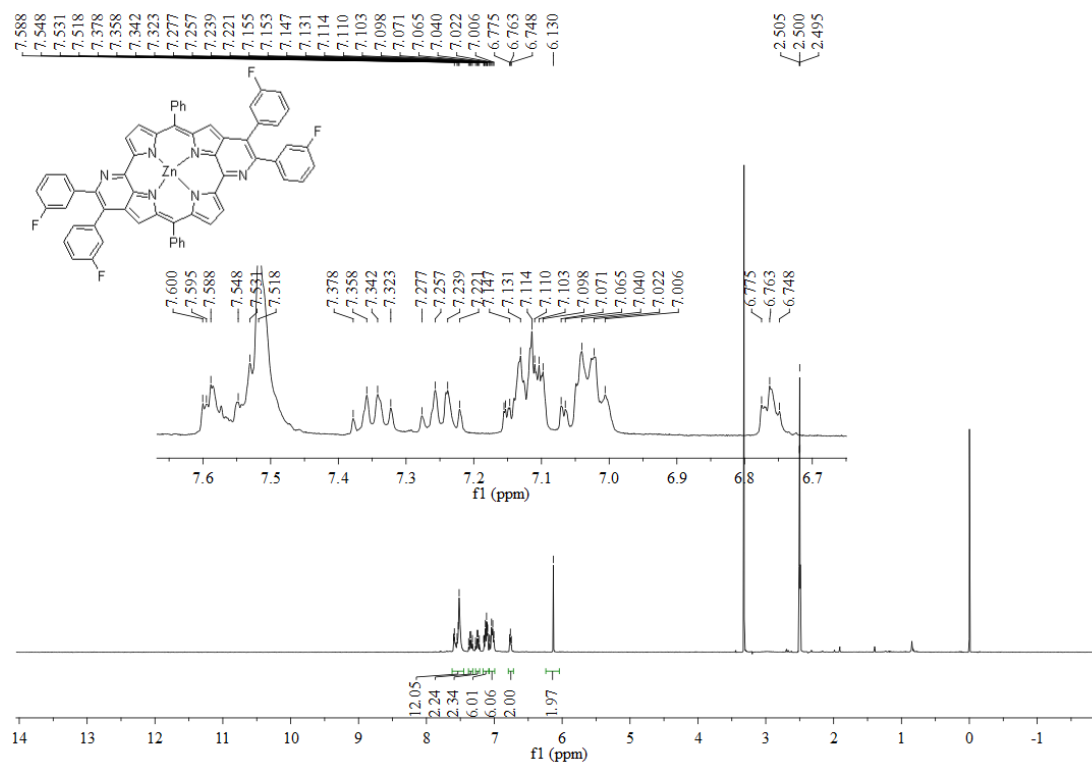

### <sup>1</sup>H NMR spectra of **3aj** (DMSO-d<sub>6</sub>)

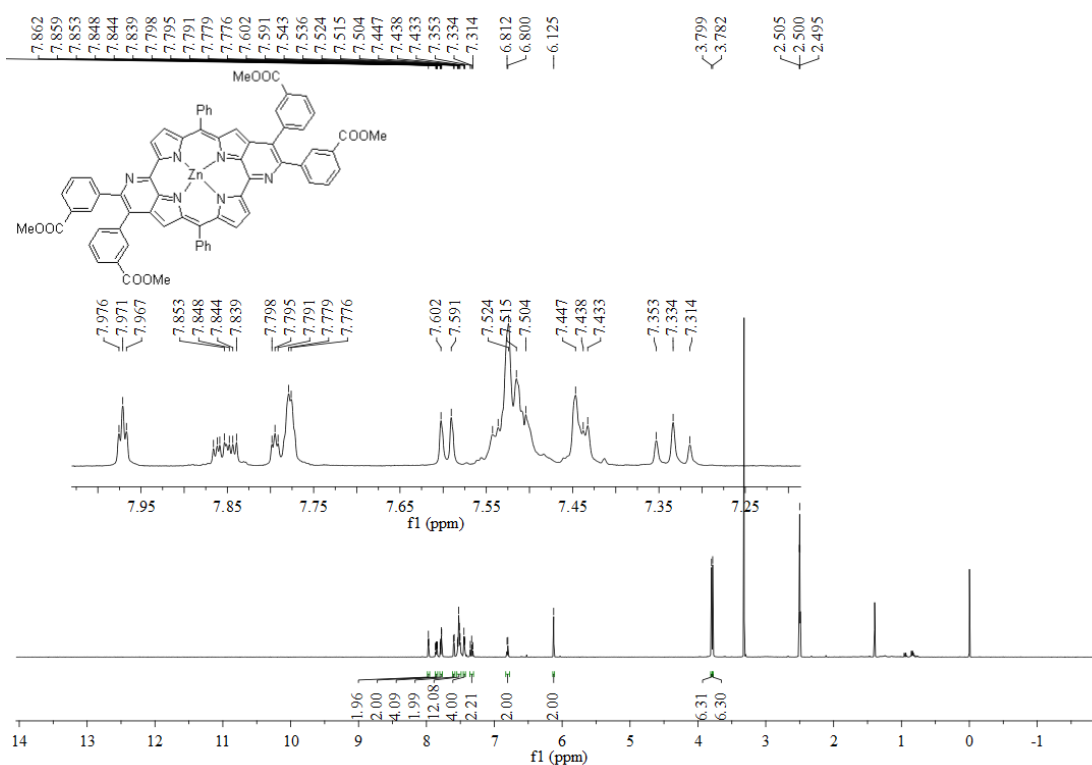

<sup>1</sup>H NMR spectra of **3ak** (DMSO-d<sub>6</sub>)

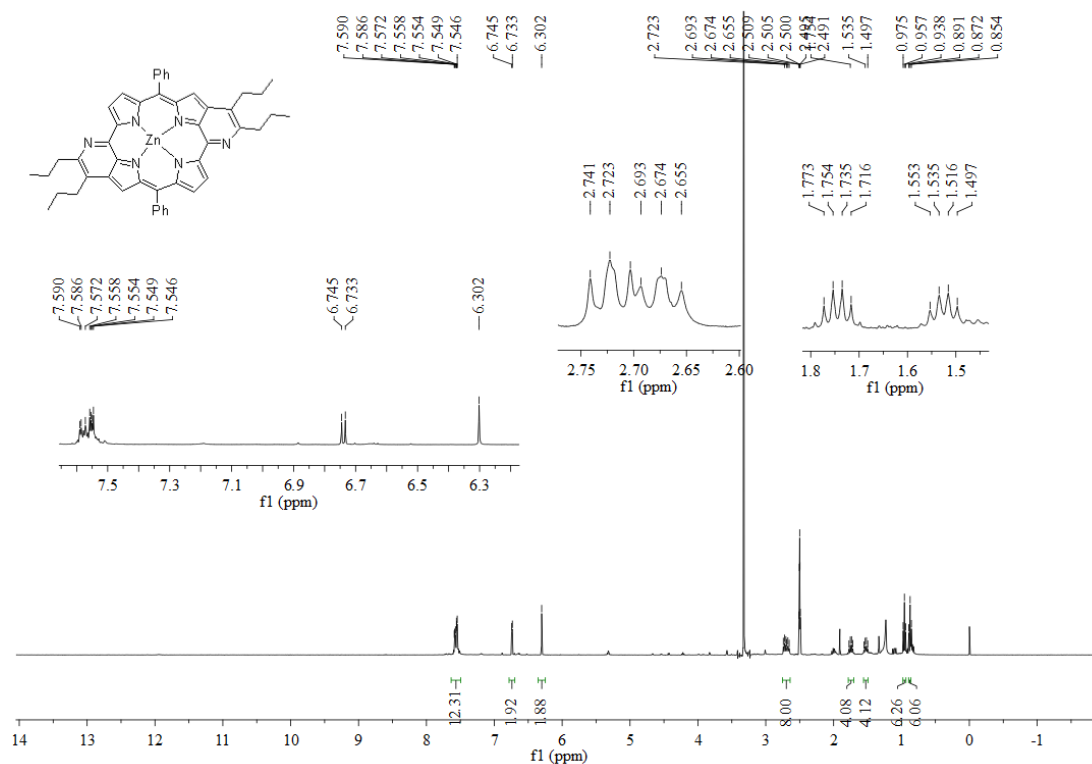

<sup>1</sup>H NMR spectra of **3ba** (CDCl<sub>3</sub>), \* represent solvent peak.

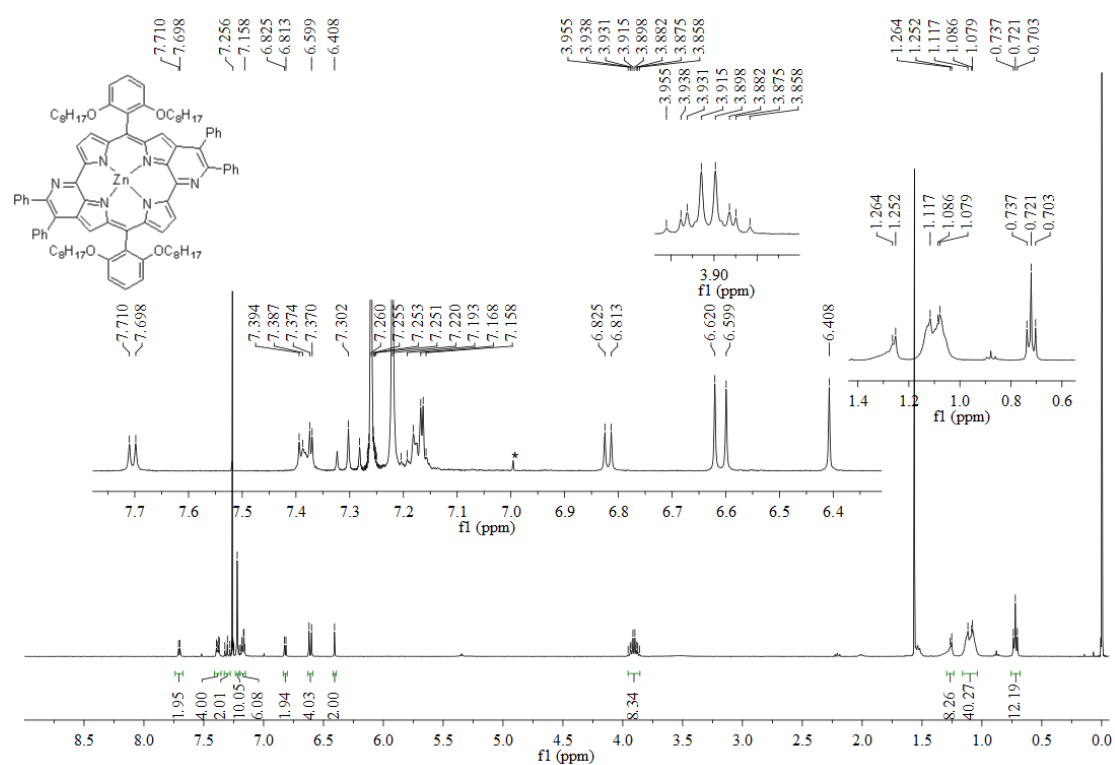



<sup>1</sup>H NMR spectra of **3ca** (CDCl<sub>3</sub>)

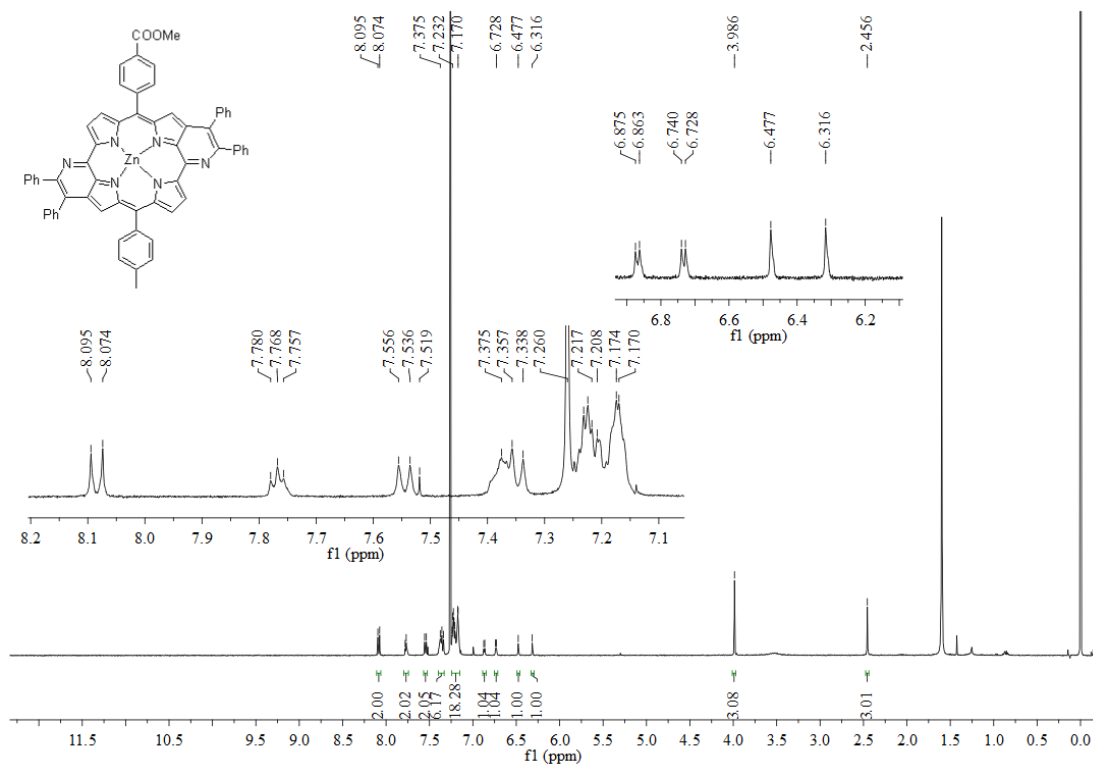

<sup>1</sup>H NMR spectra of **4aa** (DMSO-*d*<sub>6</sub>)

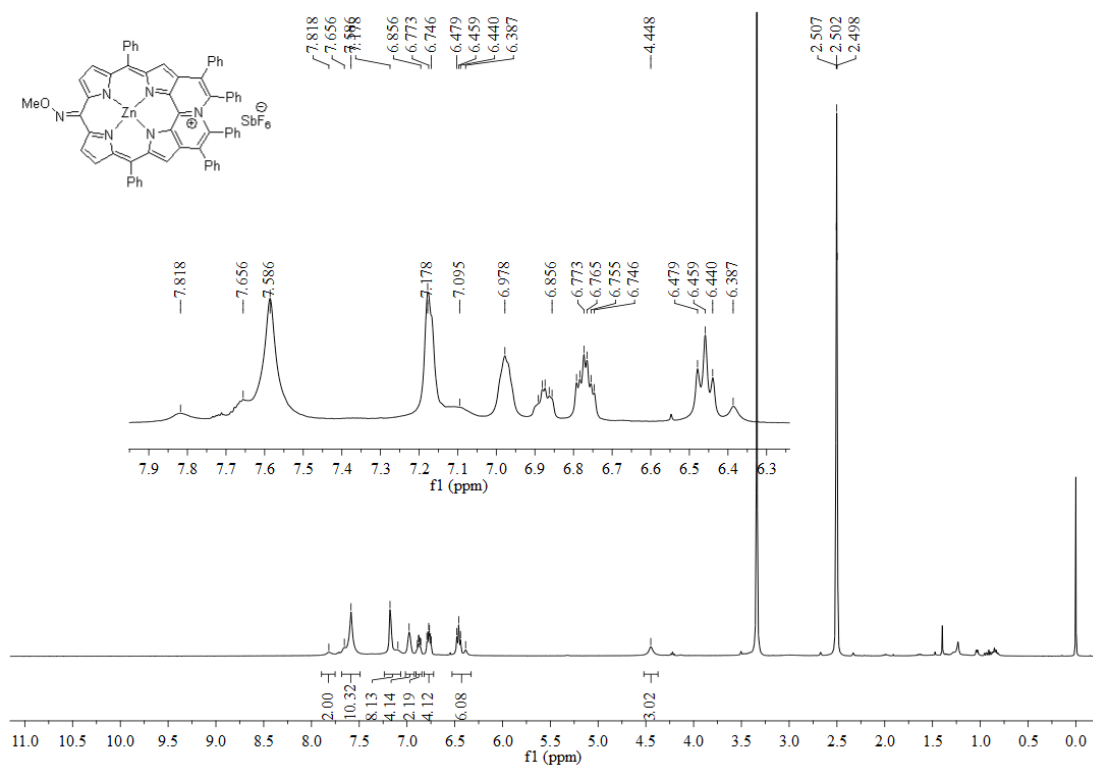

<sup>1</sup>H NMR spectra of **4ac** (DMSO-*d*<sub>6</sub>), \* represent solvent peak.

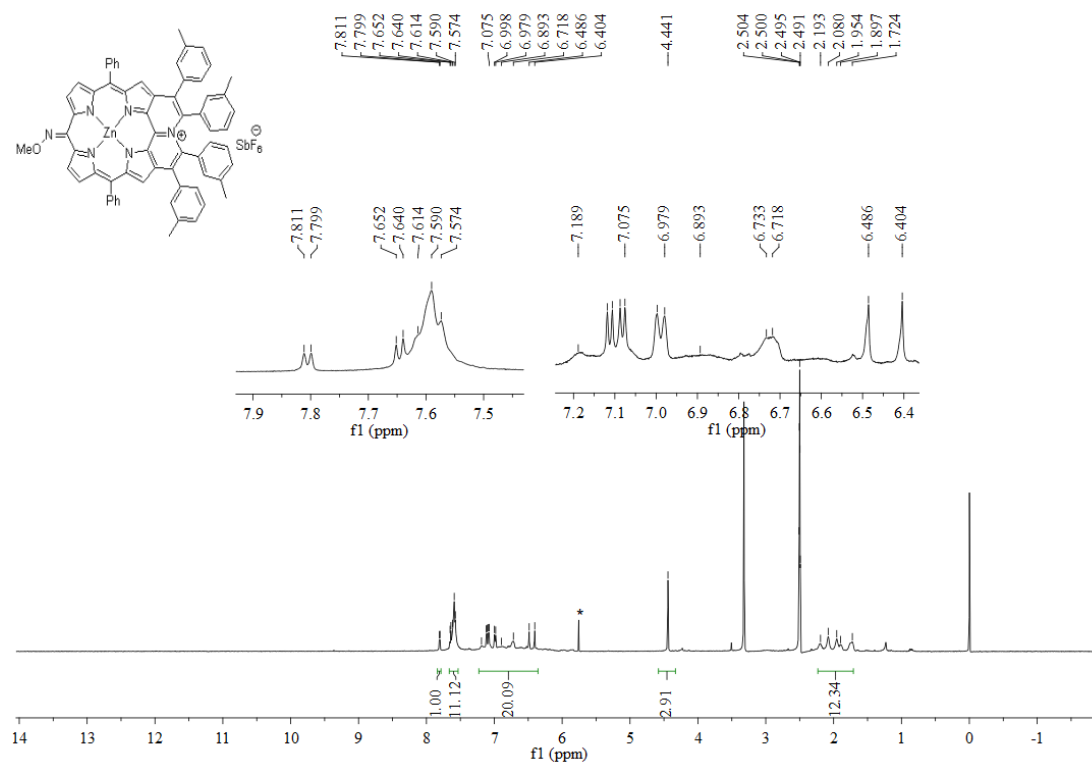

<sup>1</sup>H NMR spectra of **4af** (DMSO-*d*<sub>6</sub>)

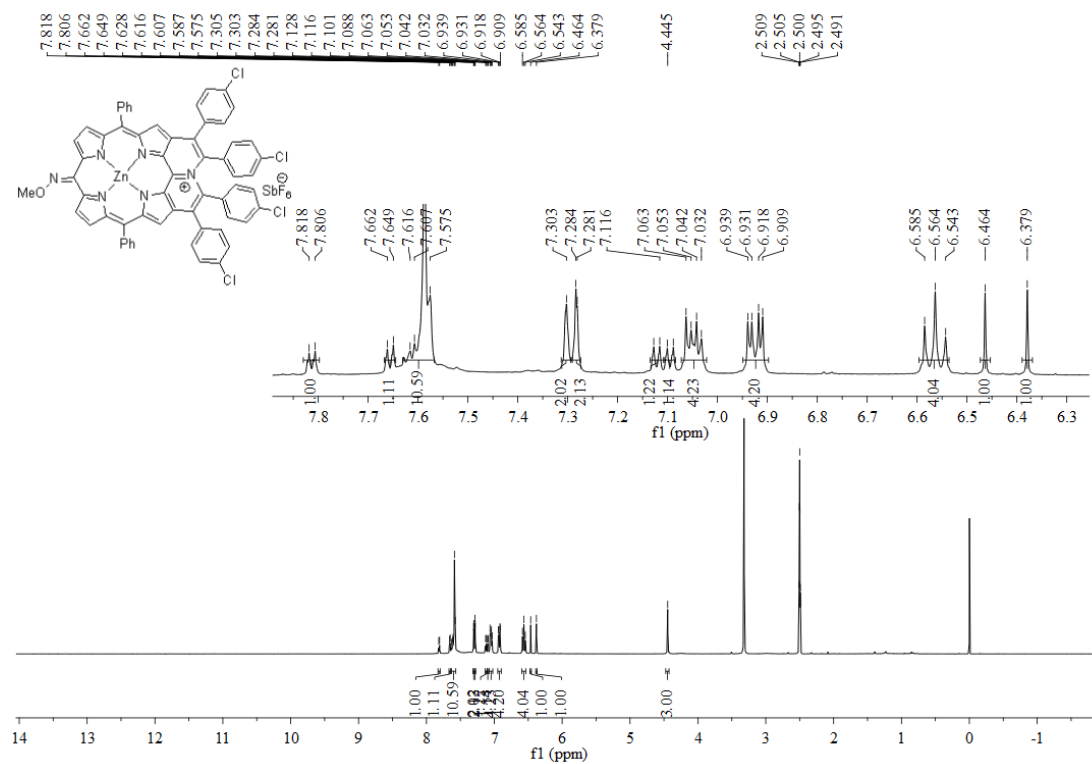

### <sup>1</sup>H NMR spectra of **4ah** (DMSO-*d*<sub>6</sub>)

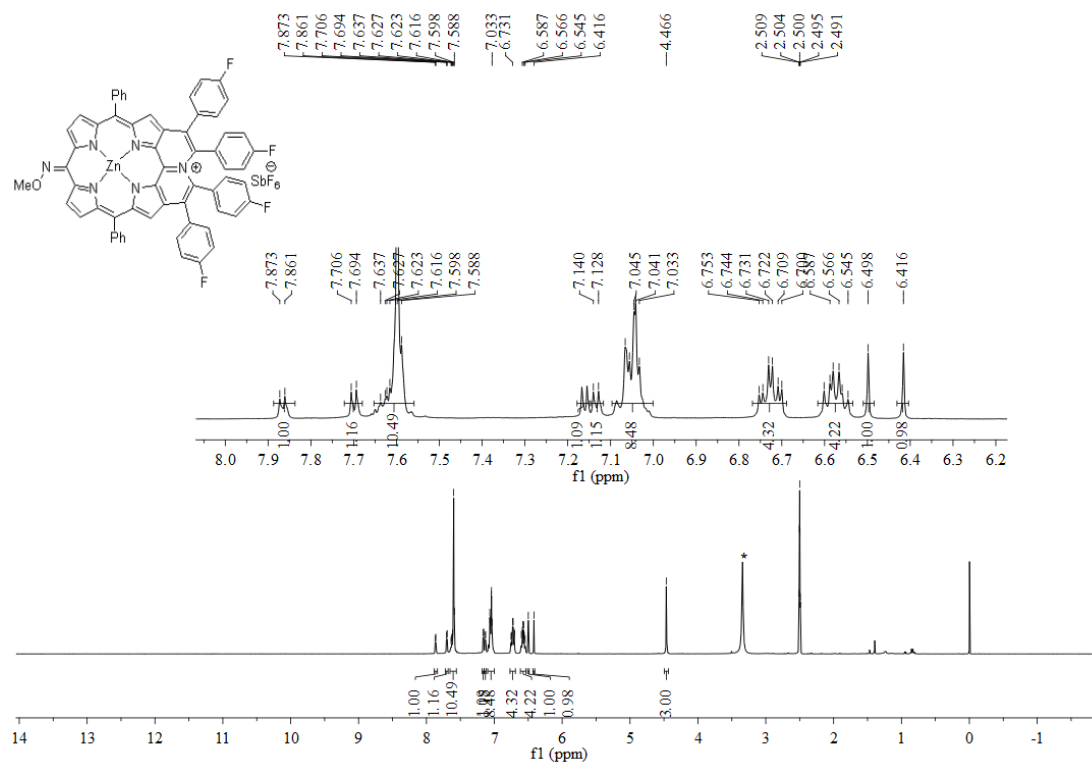

### <sup>1</sup>H NMR spectra of **4ai** (DMSO-*d*<sub>6</sub>)

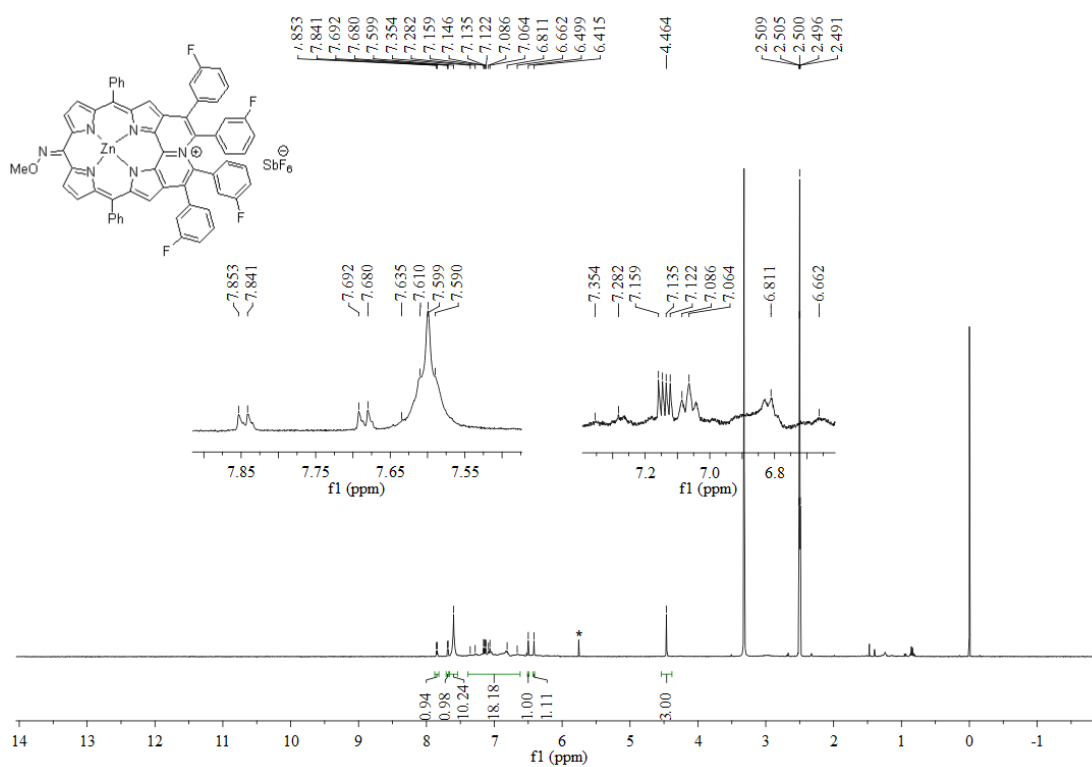

<sup>1</sup>H NMR spectra of **4al** (DMSO-d<sub>6</sub>)

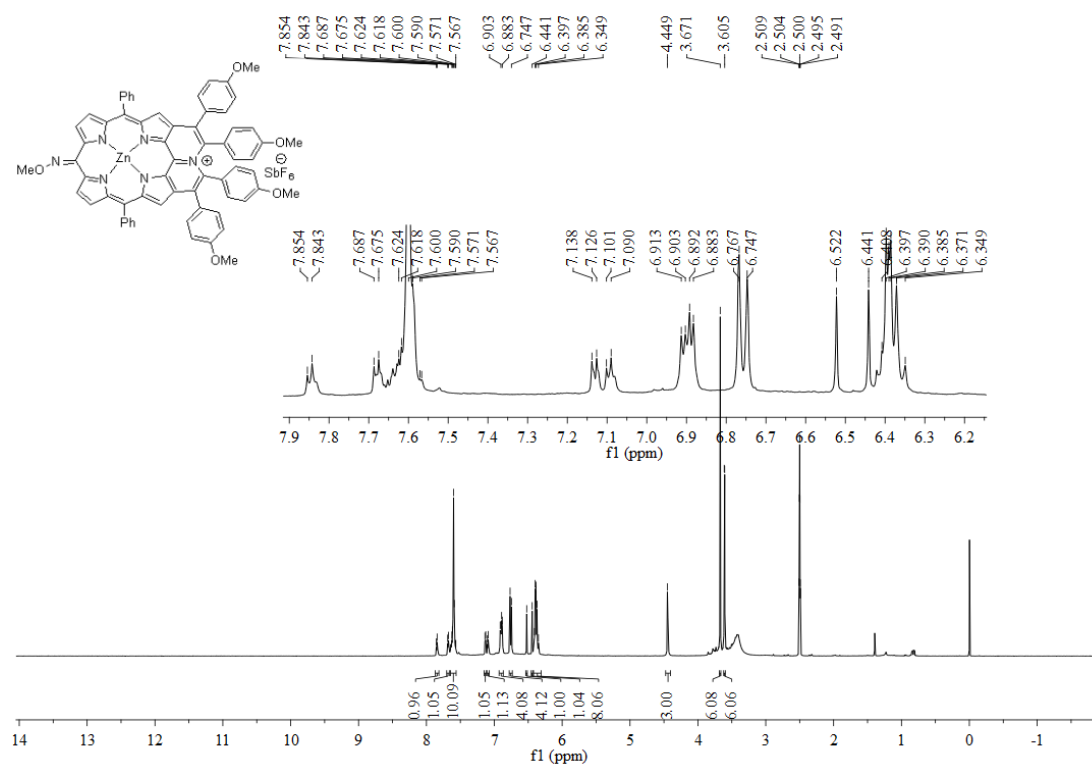

<sup>1</sup>H NMR spectra of **4am** (DMSO-d<sub>6</sub>)

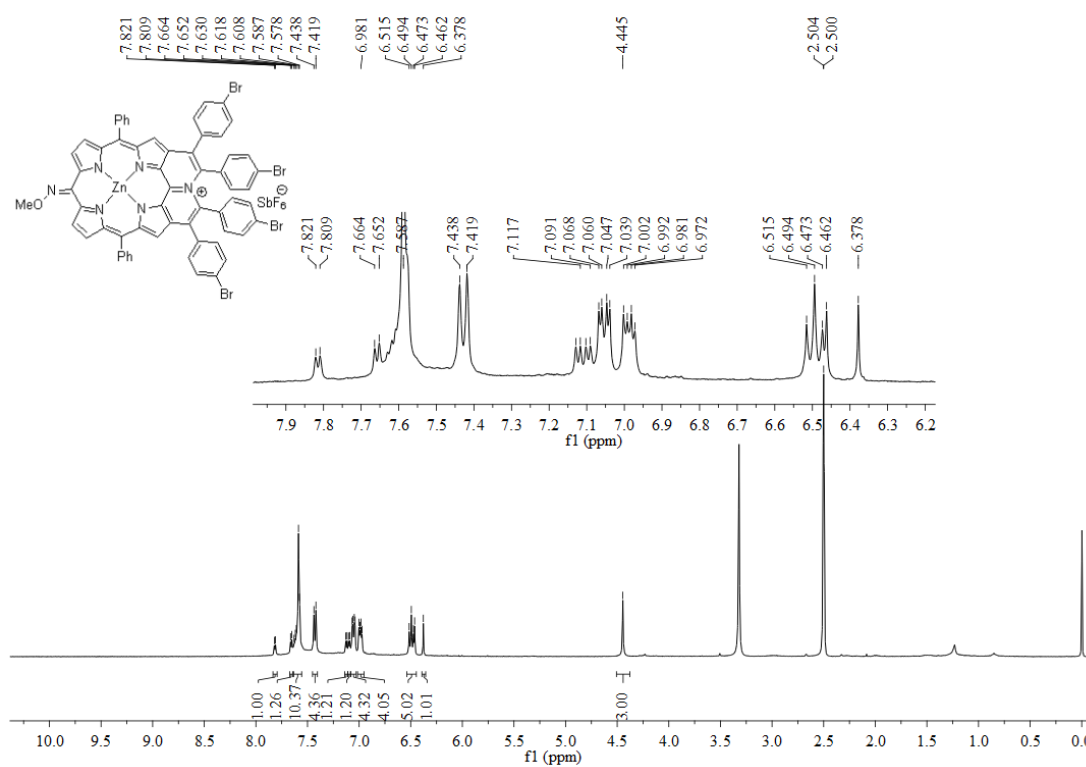

<sup>1</sup>H NMR spectra of **4an** (DMSO-d<sub>6</sub>)

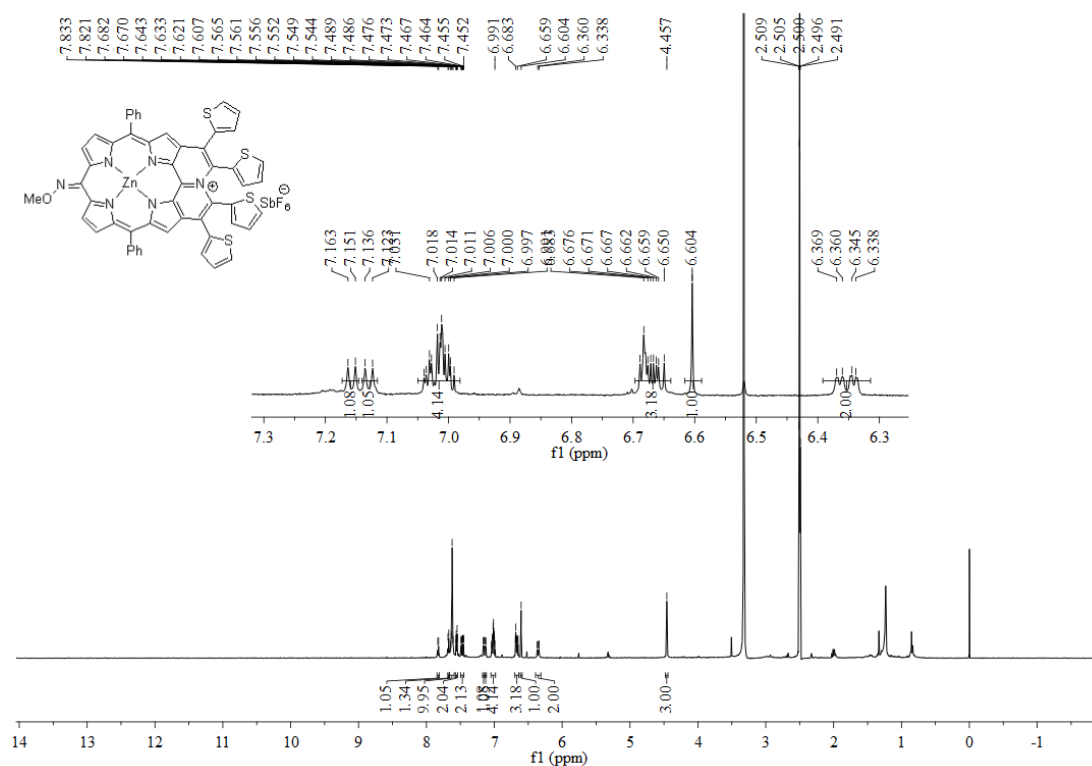

<sup>1</sup>H NMR spectra of **4da** (DMSO-d<sub>6</sub>), \* represent solvent peak.

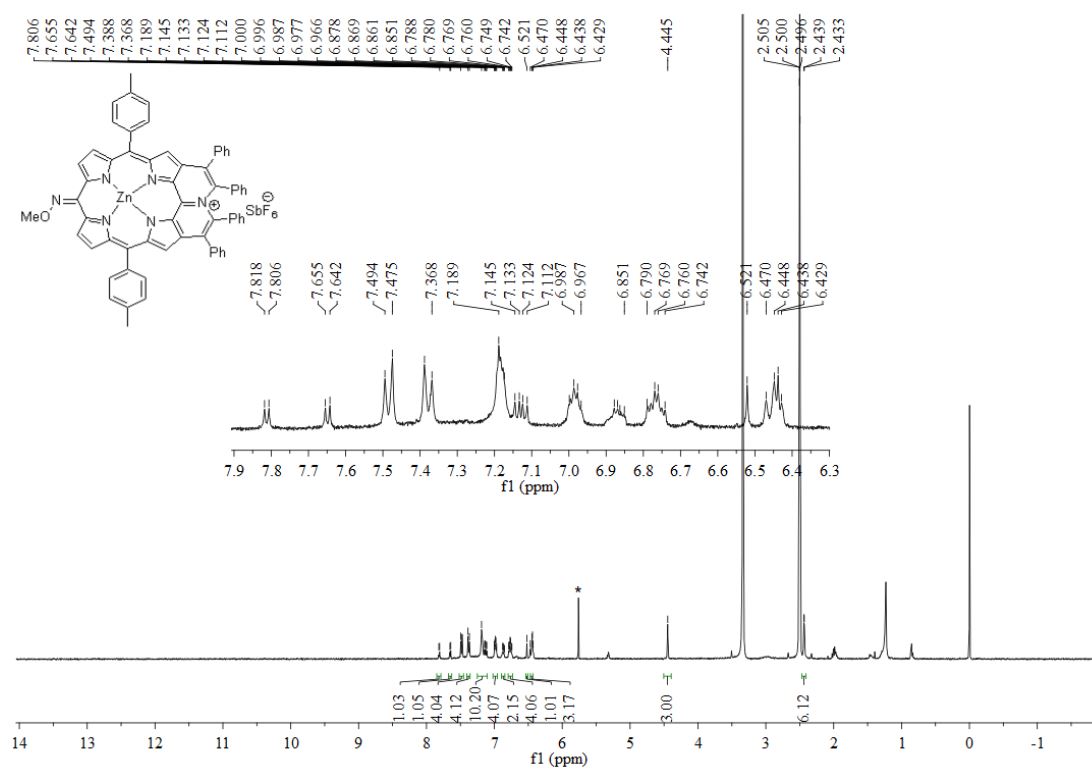

<sup>1</sup>H NMR spectra of the mixture of **5aa** (CDCl<sub>3</sub>)

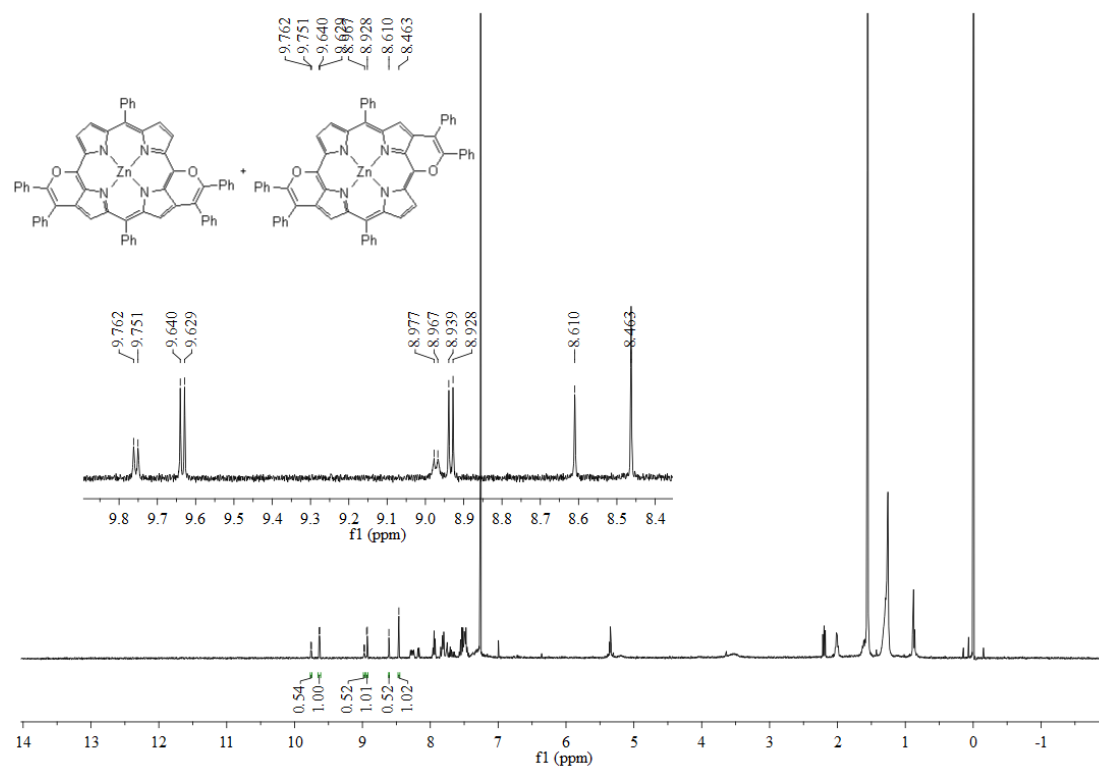

<sup>1</sup>H NMR spectra of **5ab** (CDCl<sub>3</sub>)

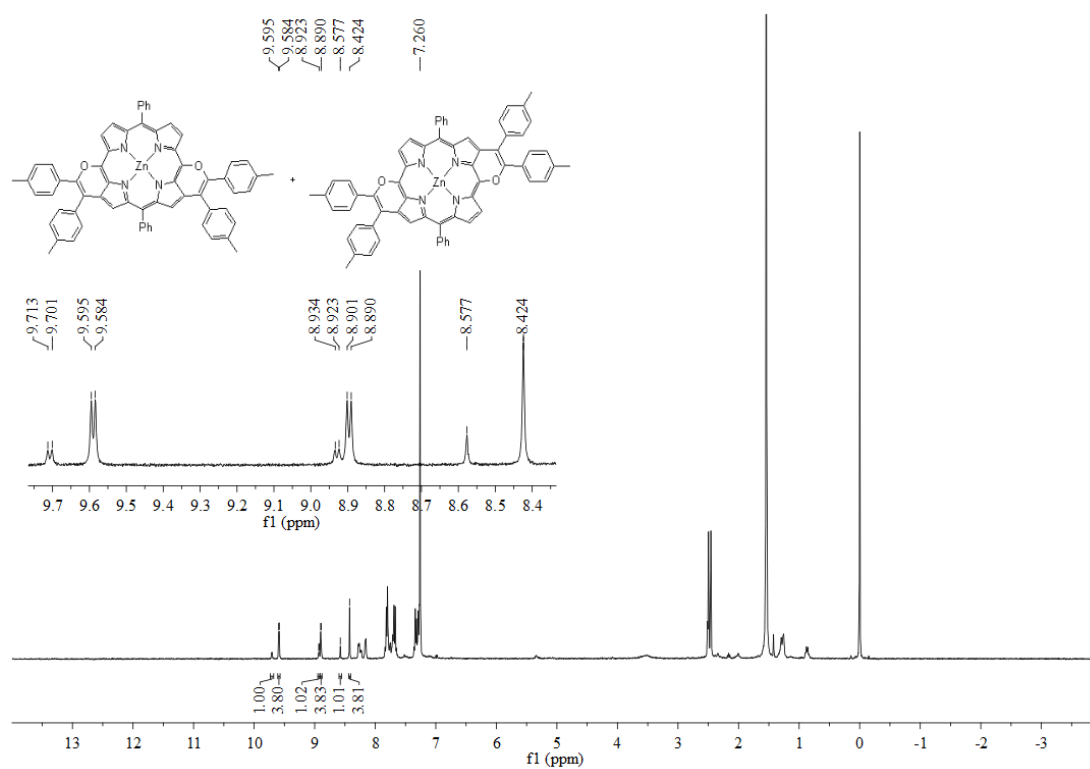

<sup>1</sup>H NMR spectra of **5ao** (CDCl<sub>3</sub>)

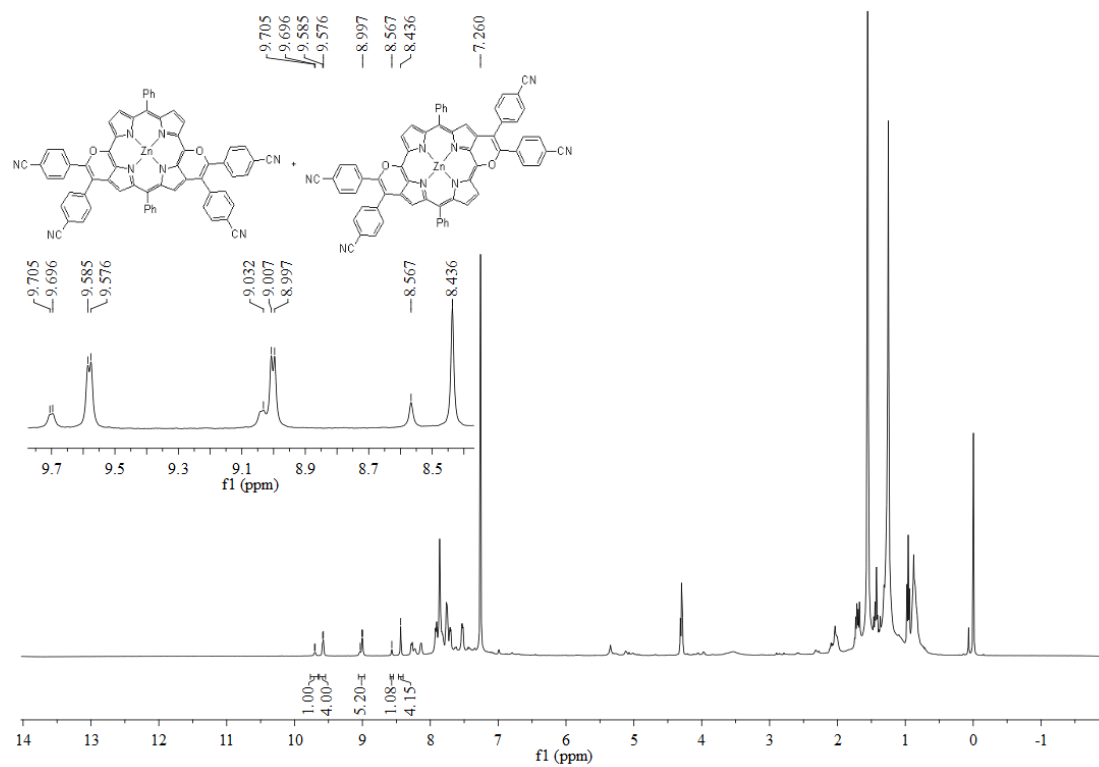

<sup>1</sup>H NMR spectra of the mixture of **5ah** (CDCl<sub>3</sub>)

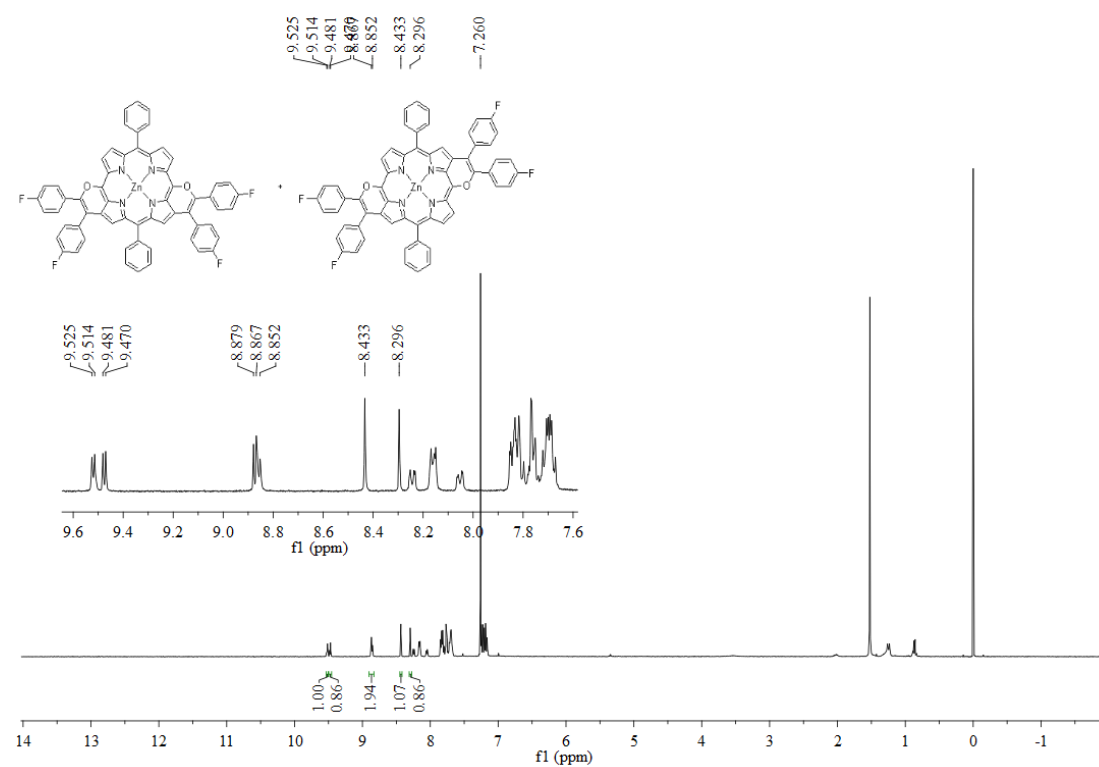

### <sup>1</sup>H NMR spectra of *syn*-5ah (CDCl<sub>3</sub>)

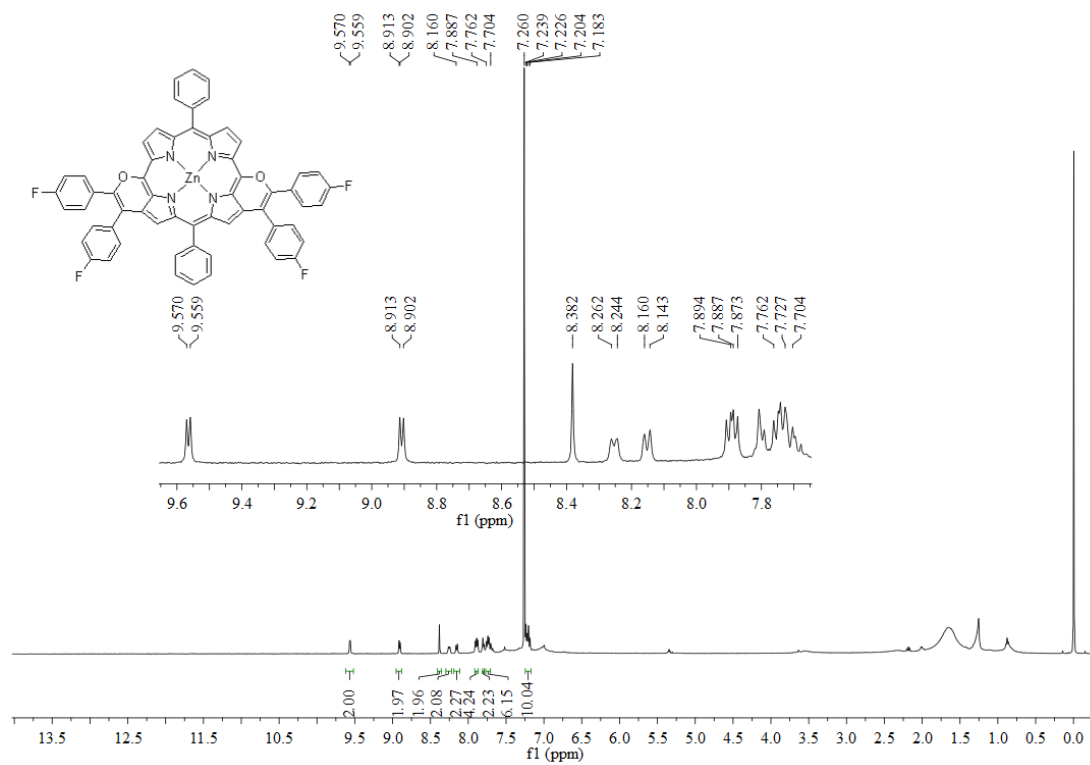

### <sup>1</sup>H NMR spectra of *anti*-5ah (CDCl<sub>3</sub>)

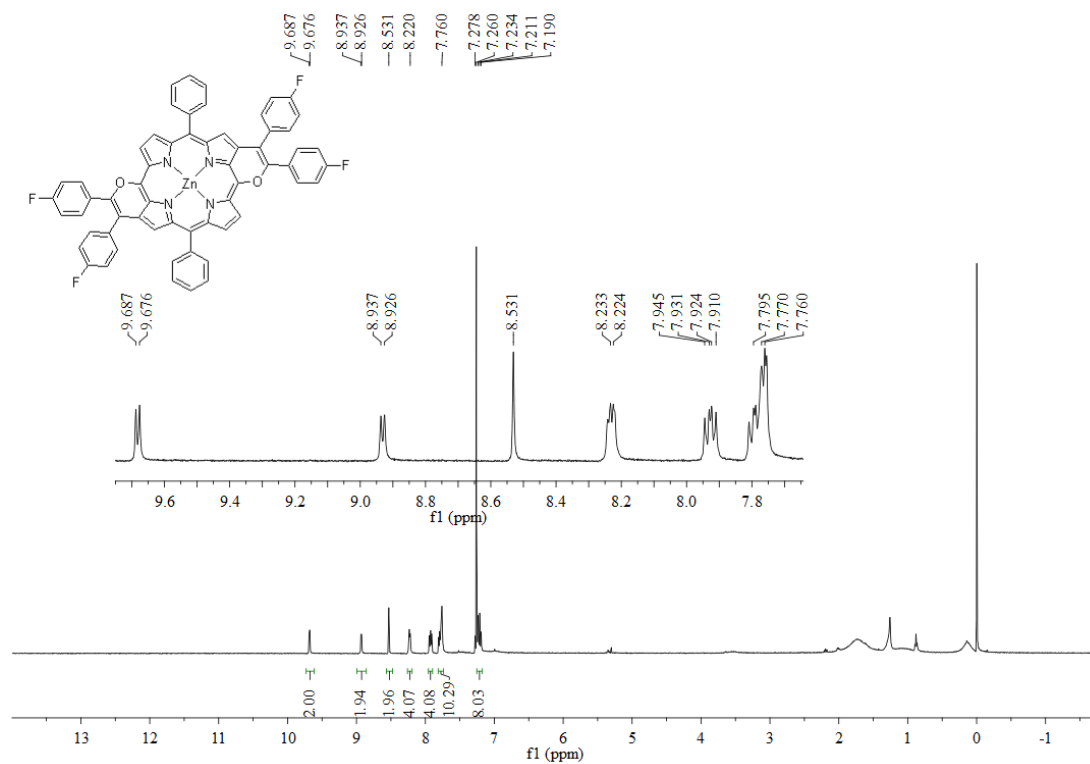



$^1\text{H}$  NMR spectra of *syn-5af* ( $\text{CDCl}_3$ ), \* represent solvent peak.

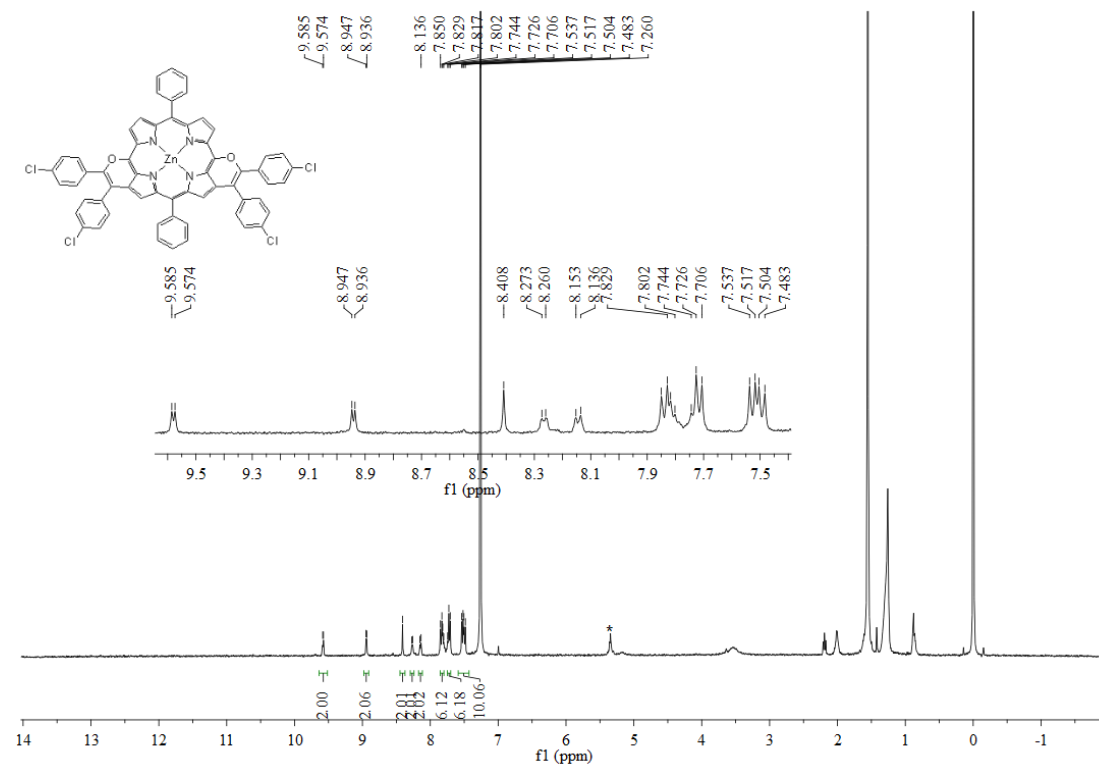

$^1\text{H}$  NMR spectra of *syn-5al* ( $\text{CDCl}_3$ )

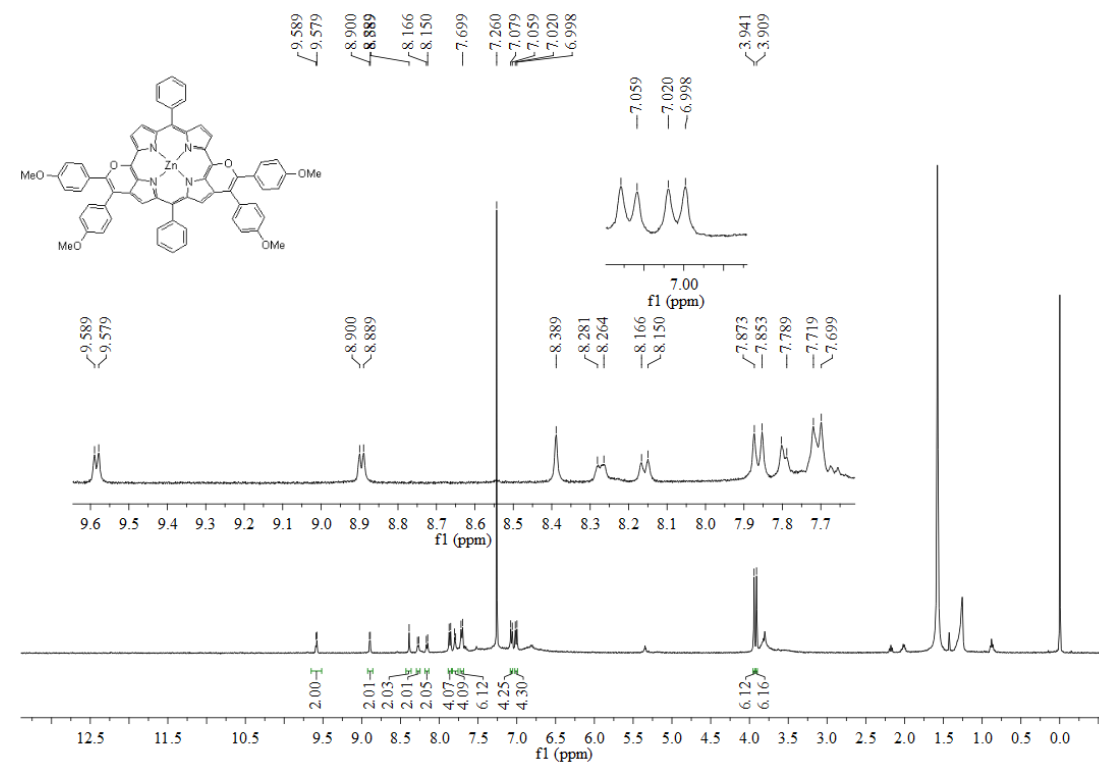

$^1\text{H}$  NMR spectra of **5ea** ( $\text{CDCl}_3$ ), \* represent solvent peak.

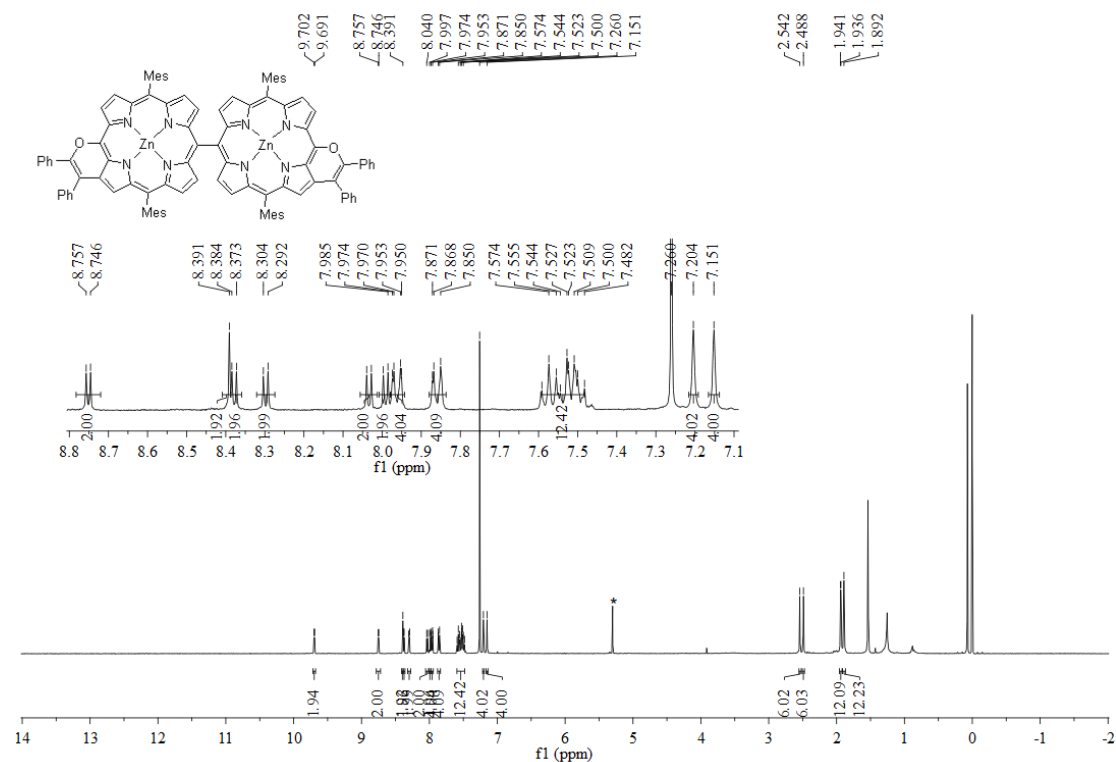

$^1\text{H}$  NMR spectra of **5eh** ( $\text{CDCl}_3$ )

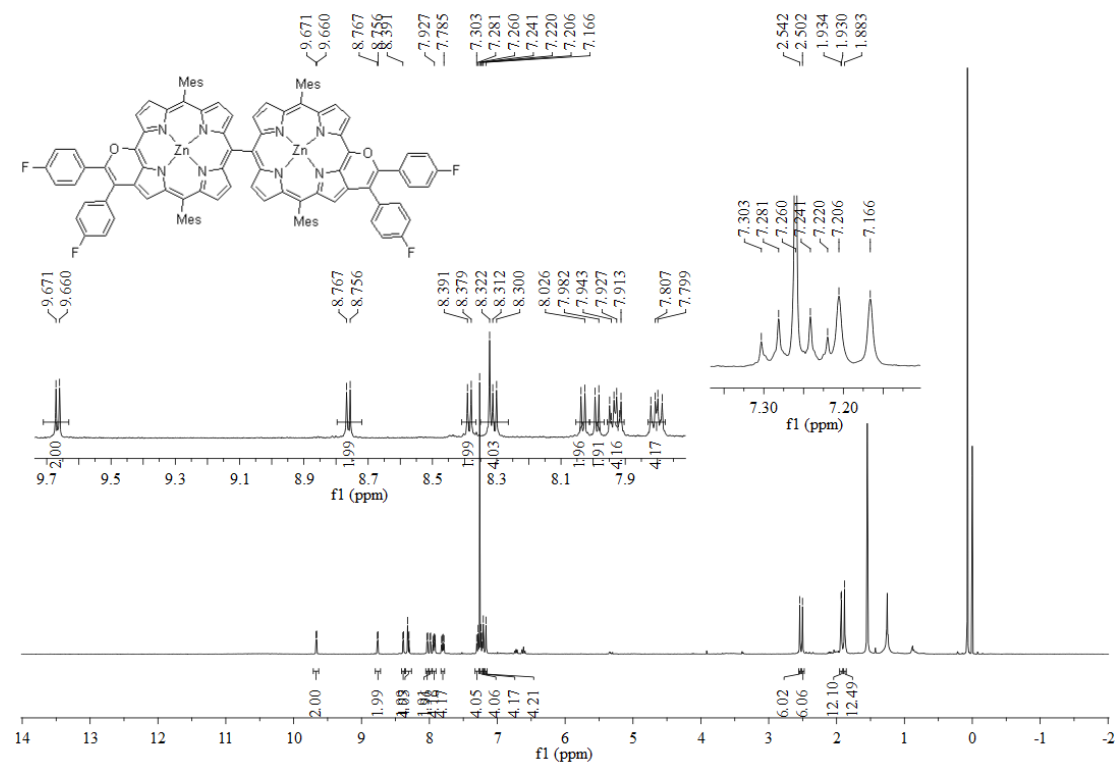

$^1\text{H}$  NMR spectra of **6** ( $\text{CD}_2\text{Cl}_2$ )

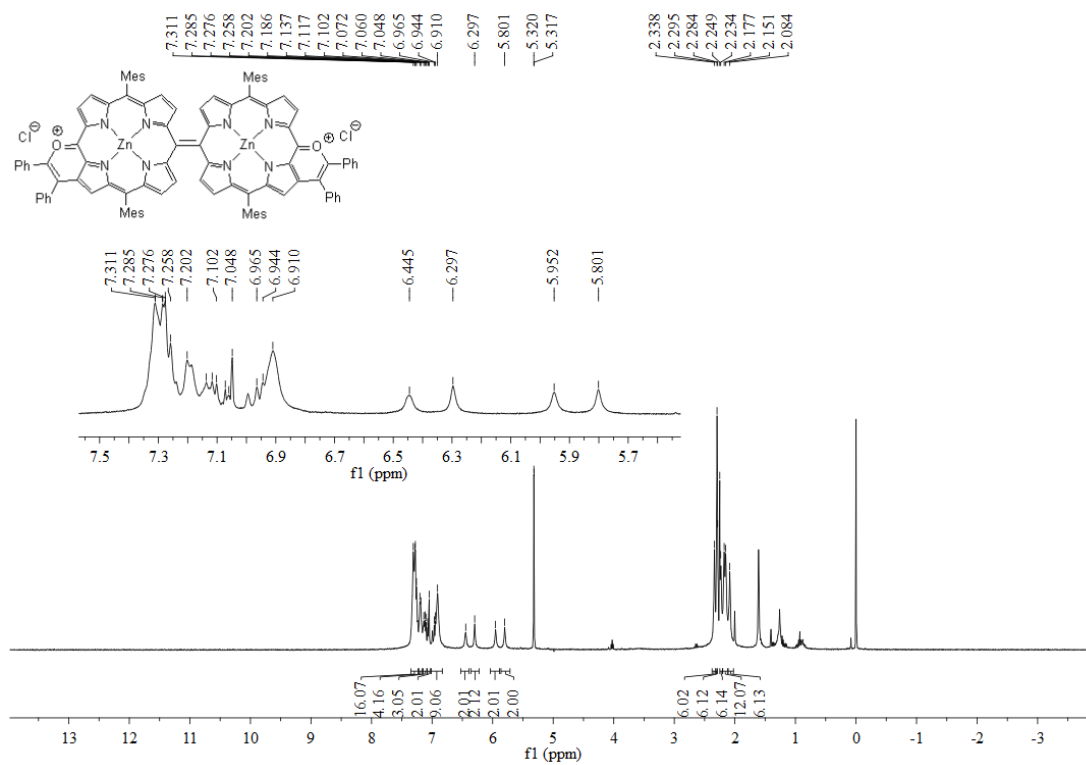

Supplement: SC-010-C9SC01596E-s001.pdf [file SC-010-C9SC01596E-s001.pdf]
